# Supplementary material for: Discovering consensus genomic regions in wheat for root-related traits by QTL meta-analysis
Source: PubMed Central journal article supplement (PMC6646344; doi:10.1038/s41598-019-47038-2), 2019-07-22

# **Discovering consensus genomic regions in wheat for root-related traits by QTL meta-analysis**

Jose Miguel Soriano and Fanny Alvaro

Sustainable Field Crops Programme, IRTA (Institute for Food and Agricultural Research and Technology), Lleida, Spain

Correspondence:  
josemiguel.soriano@irta.cat

## **Supplementary Material**

Supplementary material 1. Consensus map: Wheat\_Consensus\_2018

Supplementary material 2. Description and category of the traits collected for QTL meta-analysis.

Supplementary material 3. QTL overview index. The horizontal solid line represents the average value for the overview index and the horizontal dotted line represents the threshold for high values.

Supplementary material 1. Consensus map: Wheat\_Consensus\_2018

| Marker    | Chromosome | Position (cM) |
|-----------|------------|---------------|
| Gli-A1    | 1A         | 0             |
| wPt-5374  | 1A         | 2.3           |
| wPt-3698  | 1A         | 3.5           |
| wPt-4765  | 1A         | 6.3           |
| XksuD14b  | 1A         | 7.5           |
| wPt-2872  | 1A         | 12.4          |
| wPt-7726  | 1A         | 12.4          |
| wPt-9266  | 1A         | 12.4          |
| wPt-9317  | 1A         | 12.4          |
| wPt-1873  | 1A         | 13.3          |
| wPt-2311  | 1A         | 14.6          |
| XksuH9a   | 1A         | 15.5          |
| wPt-5167  | 1A         | 16.2          |
| wPt-8504  | 1A         | 16.2          |
| wPt-7567  | 1A         | 16.8          |
| Gli-A3    | 1A         | 18.5          |
| Xcdo580   | 1A         | 19.1          |
| wPt-2527  | 1A         | 23.1          |
| wPt-7030  | 1A         | 23.6          |
| wPt-8455  | 1A         | 23.7          |
| wPt-4029  | 1A         | 27.2          |
| XksuD14   | 1A         | 28.9          |
| wPt-7872  | 1A         | 29.4          |
| wPt-2384  | 1A         | 31.1          |
| Xbcd265a  | 1A         | 32.9          |
| wPt-4886  | 1A         | 35.2          |
| XWD004db  | 1A         | 37.5          |
| wPt-8770  | 1A         | 37.6          |
| wPt-1167  | 1A         | 38.5          |
| wPt-9752  | 1A         | 38.5          |
| wPt-6290  | 1A         | 38.6          |
| wPt-6122  | 1A         | 38.7          |
| wPt-6358  | 1A         | 40.1          |
| Glu-A3    | 1A         | 41.6          |
| wPt-6709  | 1A         | 41.6          |
| XWC2153   | 1A         | 43.5          |
| Xgdm33    | 1A         | 44.8          |
| Hg        | 1A         | 45.5          |
| M77/P64.2 | 1A         | 46.5          |
| Xpsr963.1 | 1A         | 46.5          |
| M62/P64.5 | 1A         | 47.5          |
| XSi2      | 1A         | 47.5          |
| Xfba165   | 1A         | 47.5          |

|               |    |      |
|---------------|----|------|
| Xgpw2186      | 1A | 47.5 |
| Xpsr11(Glu-3) | 1A | 47.5 |
| wPt-1862      | 1A | 47.8 |
| Xwg180        | 1A | 48.5 |
| wPt-5707      | 1A | 49.3 |
| wPt-3983      | 1A | 49.4 |
| Pm3           | 1A | 49.8 |
| XGlu3         | 1A | 49.8 |
| Xmta16y       | 1A | 49.8 |
| Xpsp2999      | 1A | 49.8 |
| P38/M47-5     | 1A | 50.8 |
| Xgpw2246      | 1A | 50.8 |
| wPt-8072      | 1A | 50.9 |
| wPt-9423      | 1A | 51   |
| Xgpw2276      | 1A | 51.2 |
| tin1          | 1A | 51.2 |
| Xgwm136       | 1A | 51.2 |
| Xcfa2153      | 1A | 52.2 |
| XgpwE5        | 1A | 52.2 |
| XgpwE8        | 1A | 52.2 |
| XgpwE9        | 1A | 52.2 |
| Xmta14c       | 1A | 52.2 |
| Xcdo431       | 1A | 53.2 |
| Xfbb196       | 1A | 54.2 |
| Pm3a          | 1A | 54.9 |
| XksuD14.2     | 1A | 55.2 |
| Xbcd808a      | 1A | 55.4 |
| wPt-3870      | 1A | 56   |
| P32/M54-4     | 1A | 56.1 |
| M51/P65.5     | 1A | 57.1 |
| Pm3e          | 1A | 57.6 |
| Xfba254       | 1A | 58   |
| Xfba393       | 1A | 58   |
| Mlar          | 1A | 59.1 |
| Xcdo1160      | 1A | 59.3 |
| Xfba286       | 1A | 59.9 |
| Lr10          | 1A | 61.3 |
| Xfbb160       | 1A | 61.8 |
| Xfbb234       | 1A | 61.8 |
| Xmwg60        | 1A | 61.8 |
| Xfbb319       | 1A | 62.8 |
| Xgpw2032      | 1A | 62.8 |
| Xgwm33.1      | 1A | 62.8 |
| H9/H10/H11    | 1A | 63.8 |
| Xfba285       | 1A | 63.8 |

|             |    |      |
|-------------|----|------|
| Xhor12      | 1A | 63.8 |
| Xbarc263    | 1A | 63.8 |
| wPt-2150    | 1A | 64   |
| Xcfa2226    | 1A | 64.2 |
| Xcfd15      | 1A | 64.9 |
| Xgwm33      | 1A | 66.8 |
| XGli3       | 1A | 67   |
| Xabc156     | 1A | 67   |
| Xpsp3151    | 1A | 67.1 |
| Xwmc818     | 1A | 67.9 |
| P40/M60-138 | 1A | 69.1 |
| P42/M50-2   | 1A | 69.1 |
| Xwmc104     | 1A | 69.1 |
| Xwmc329.1   | 1A | 69.1 |
| Xcdo426     | 1A | 69.1 |
| wPt-9757    | 1A | 69.3 |
| P40/M61-2   | 1A | 70.1 |
| Xcfa2158    | 1A | 70.1 |
| Xwmc33      | 1A | 70.8 |
| P78/M71.5   | 1A | 71.1 |
| XChs3       | 1A | 71.1 |
| Xgpw2005    | 1A | 71.1 |
| XksuE19     | 1A | 72.1 |
| Xwmc336     | 1A | 72.5 |
| XksuE18     | 1A | 73.2 |
| Xgwm264     | 1A | 74.5 |
| wPt-9429    | 1A | 76   |
| Xbcd2015    | 1A | 76.2 |
| Xwmc95      | 1A | 76.2 |
| wPt-0164    | 1A | 76.9 |
| Xgdm136     | 1A | 77.2 |
| Xbcd98      | 1A | 77.3 |
| wPt-3904    | 1A | 78.3 |
| Xbarc83     | 1A | 79.9 |
| Xbcd98.1    | 1A | 79.9 |
| Xwmc24      | 1A | 80.7 |
| XksuG9a     | 1A | 81.5 |
| XcsiH69     | 1A | 82.3 |
| XgbxR507    | 1A | 82.3 |
| Xgwm357     | 1A | 82.8 |
| M77/P64.13  | 1A | 83.3 |
| Xmwg2021.2  | 1A | 83.3 |
| Xmwg67      | 1A | 83.3 |
| Xbarc119    | 1A | 84.2 |
| wPt-2436    | 1A | 84.4 |

|              |    |      |
|--------------|----|------|
| wPt-2251     | 1A | 84.6 |
| Xgwm666      | 1A | 86.8 |
| Xgwm164      | 1A | 86.9 |
| XTri         | 1A | 87.4 |
| Xfba298      | 1A | 87.4 |
| Xpsr381      | 1A | 87.4 |
| Xbarc148     | 1A | 87.4 |
| XBCD175      | 1A | 88.4 |
| XWB148       | 1A | 88.4 |
| Xfba26       | 1A | 88.4 |
| Xwmc286      | 1A | 89.4 |
| P34/M51-324  | 1A | 90.4 |
| Xmwg645      | 1A | 90.4 |
| Xabg373      | 1A | 90.4 |
| Xbcd1072     | 1A | 90.4 |
| Xgwm108      | 1A | 90.4 |
| Xbcd368      | 1A | 90.4 |
| Xpsr161      | 1A | 90.4 |
| P35/M54-7    | 1A | 91.4 |
| P40/M61-10   | 1A | 91.4 |
| Xabg452      | 1A | 91.4 |
| Xmwg758      | 1A | 91.4 |
| Xp219dral    | 1A | 91.4 |
| Xrz244       | 1A | 91.4 |
| Xcfd59       | 1A | 91.9 |
| Xbcd1072.1   | 1A | 92.3 |
| Xfbb107      | 1A | 92.3 |
| XEm          | 1A | 93.3 |
| Xbcd12       | 1A | 93.3 |
| Xbcd200      | 1A | 93.3 |
| Xcdo105      | 1A | 93.3 |
| Xwmc84       | 1A | 93.3 |
| P34/M50-6    | 1A | 94.3 |
| Xcdo98       | 1A | 94.3 |
| XksuG9       | 1A | 94.3 |
| Xpsp3001-161 | 1A | 94.3 |
| Xpsp3027     | 1A | 94.3 |
| Xwmc084      | 1A | 94.3 |
| M60/P64.8    | 1A | 95.3 |
| M83/P65.1    | 1A | 95.3 |
| Xbarc162     | 1A | 95.3 |
| Xwg605a      | 1A | 95.3 |
| Xbcd98.2     | 1A | 96.3 |
| XcnI5        | 1A | 96.3 |
| Xwg605b      | 1A | 96.3 |

|             |    |       |
|-------------|----|-------|
| Xwmc120     | 1A | 96.3  |
| P39/M69-239 | 1A | 97.3  |
| Xbarc120    | 1A | 97.3  |
| Xfba118     | 1A | 97.3  |
| Xfbb274     | 1A | 97.3  |
| Xwmc744     | 1A | 97.4  |
| Xcfd30      | 1A | 97.6  |
| Xbarc28     | 1A | 98.1  |
| Xcfd30a     | 1A | 98.1  |
| P34/M51-341 | 1A | 99.4  |
| Xgpw2142    | 1A | 99.4  |
| Xgpw2277    | 1A | 99.4  |
| Xgwm135     | 1A | 99.4  |
| Xwmc278     | 1A | 100.4 |
| Xwmc630     | 1A | 100.8 |
| Xbcd446     | 1A | 100.8 |
| Xgpw1134    | 1A | 100.8 |
| Xpsp3003    | 1A | 100.8 |
| Xwmc826     | 1A | 101   |
| Xwmc611     | 1A | 101.1 |
| Xwmc11      | 1A | 101.2 |
| Xcfa2135    | 1A | 101.8 |
| Xgpw2115    | 1A | 101.8 |
| Xwg983      | 1A | 101.8 |
| Xwmc469     | 1A | 101.9 |
| wPt-6074    | 1A | 102.3 |
| Xcdo312     | 1A | 102.9 |
| Xbarc240    | 1A | 102.9 |
| Xwmc183     | 1A | 102.9 |
| Xcfd22      | 1A | 103.1 |
| Xwmc550     | 1A | 103.6 |
| Xcdo473     | 1A | 104   |
| wPt-1011    | 1A | 104.8 |
| Xcdo92b     | 1A | 105   |
| Glu-A1      | 1A | 105.4 |
| XksuD49     | 1A | 105.4 |
| Xbcd22      | 1A | 105.9 |
| XgbxGx74    | 1A | 105.9 |
| Xgpw2045    | 1A | 105.9 |
| Xgpw2259    | 1A | 105.9 |
| Xpsr1327    | 1A | 105.9 |
| Xbcd1407    | 1A | 106.9 |
| Xcdo278Dra  | 1A | 106.9 |
| Xmwig632    | 1A | 107.1 |
| wPt-0527    | 1A | 107.2 |

|                  |    |       |
|------------------|----|-------|
| Xwmc304          | 1A | 107.3 |
| M17/P77.15       | 1A | 107.9 |
| Xgbx3076         | 1A | 107.9 |
| Xpsr2019.1(Aba8) | 1A | 108.9 |
| Xwmc312          | 1A | 108.9 |
| Xwmc93           | 1A | 109.2 |
| P42/M51-295      | 1A | 110.2 |
| P40/M47-3        | 1A | 111.2 |
| Xabc155          | 1A | 111.2 |
| Xgpw2069         | 1A | 113.2 |
| Xcmwg733         | 1A | 115.2 |
| Xgpw2006         | 1A | 115.2 |
| P42/M47-2        | 1A | 116.2 |
| Xbcd738          | 1A | 116.2 |
| Xpsr325          | 1A | 116.2 |
| Xbcd187          | 1A | 118.2 |
| Xbcd265          | 1A | 118.2 |
| Xmsu488(Lec)     | 1A | 120.2 |
| Xmta17           | 1A | 120.2 |
| Xbcd304b         | 1A | 121.2 |
| XksuE3           | 1A | 121.2 |
| Xpsr634          | 1A | 121.2 |
| Xbcd1930         | 1A | 123.2 |
| Xcdo1188b        | 1A | 123.2 |
| Xpsr162          | 1A | 123.2 |
| Xbcd808b         | 1A | 124.2 |
| Xcmwg706         | 1A | 124.2 |
| Xbcd1889         | 1A | 125.2 |
| XksuH14          | 1A | 126.2 |
| Xfba316          | 1A | 128.2 |
| XksuE8           | 1A | 128.2 |
| Xcfa2129         | 1A | 129.2 |
| Xpsp3003b        | 1A | 129.2 |
| Xwmc9            | 1A | 129.9 |
| wPt-2406         | 1A | 133.3 |
| wPt-2976         | 1A | 133.3 |
| wPt-4709         | 1A | 133.3 |
| wPt-5274         | 1A | 133.3 |
| wPt-6754         | 1A | 133.3 |
| wPt-8644         | 1A | 133.3 |
| wPt-4658         | 1A | 133.6 |
| wPt-6005         | 1A | 133.6 |
| XAdh3            | 1A | 133.7 |
| Xmwg676          | 1A | 133.7 |
| wPt-5577         | 1A | 134   |

|            |    |       |
|------------|----|-------|
| wPt-0432   | 1A | 134.3 |
| Xfba92     | 1A | 134.7 |
| XksuH9     | 1A | 136.7 |
| Xgwm106    | 1A | 137.7 |
| Xbcd808    | 1A | 138.2 |
| XksuG34    | 1A | 138.8 |
| P35/M49-1  | 1A | 140.8 |
| Xcdo89     | 1A | 140.8 |
| Xgwm497    | 1A | 140.8 |
| wPt-8016   | 1A | 140.8 |
| Xbcd1434RV | 1A | 141.8 |
| Xcfa2056   | 1A | 145.8 |
| Xcni5a     | 1A | 145.8 |
| Xfba311    | 1A | 145.8 |
| Xmwg710    | 1A | 145.8 |
| Xfbb142    | 1A | 147.8 |
| Xfba234    | 1A | 148.8 |
| Xdupw38    | 1A | 150.5 |
| Xwmc673    | 1A | 150.5 |
| Xfbb171    | 1A | 151.6 |
| Xwmc51     | 1A | 152.4 |
| Xwmc716    | 1A | 153.2 |
| wPt-0258   | 1A | 154.4 |
| wPt-0128   | 1A | 154.7 |
| XksuH9b    | 1A | 155   |
| P78/M92-4  | 1A | 155.6 |
| Xmwg733    | 1A | 155.6 |
| wPt-5316   | 1A | 156.3 |
| Xfba279    | 1A | 158.3 |
| Xpsr967    | 1A | 159.3 |
| Xbcd304    | 1A | 160.3 |
| Xpsr386    | 1A | 160.3 |
| Xwmc254    | 1A | 160.3 |
| Xwmc59     | 1A | 160.3 |
| Xfba266    | 1A | 161.3 |
| Xfba268    | 1A | 161.3 |
| XgbxG097   | 1A | 161.3 |
| XgpwE7     | 1A | 161.3 |
| Xmwg912    | 1A | 162.3 |
| Xwmc237    | 1A | 162.3 |
| wPt-2847   | 1A | 164.9 |
| M21/P76.5  | 1A | 167.1 |
| Xbarc213   | 1A | 168.1 |
| XksuE11b   | 1A | 168.1 |
| M71/P77.5  | 1A | 169.1 |



|                 |    |       |
|-----------------|----|-------|
| Xwg241          | 1A | 169.1 |
| Eps-1Am         | 1A | 170.1 |
| XksuE11.1a      | 1A | 178.1 |
| Xcdo393         | 1A | 179.1 |
| P78/M69.4       | 1A | 180.1 |
| wPt-1078        | 1A | 183.4 |
| wPt-2927        | 1A | 183.4 |
| Xbarc287        | 1A | 183.6 |
| Xbarc158        | 1A | 185.6 |
| Xbarc17         | 1A | 186.3 |
| Xbarc145        | 1A | 187.1 |
| Xcfa2219        | 1A | 193.3 |
| Xgwm99          | 1A | 194.8 |
| Gli-B1          | 1B | 0     |
| wPt-0308        | 1B | 1.2   |
| wPt-304810      | 1B | 2.8   |
| Xbcd1434        | 1B | 4     |
| Xopw13-435      | 1B | 4     |
| Xpsr11(Glu-3).1 | 1B | 4     |
| Yr10            | 1B | 4     |
| Glu-B3          | 1B | 5     |
| Xfbb250         | 1B | 5     |
| Xmta16a         | 1B | 5     |
| Xmtd161         | 1B | 5     |
| Xpsp3000        | 1B | 5     |
| XksuD14         | 1B | 6     |
| TC69046         | 1B | 6.1   |
| P31/M52-2       | 1B | 6.9   |
| Xmta14          | 1B | 7.9   |
| Ogliada         | 1B | 8.7   |
| Xpsr12(Glu-1)   | 1B | 8.9   |
| Xcfd15          | 1B | 10.9  |
| Xpsr11(Glu-3).2 | 1B | 10.9  |
| XHplc2-3        | 1B | 11.9  |
| Xwhs179a        | 1B | 11.9  |
| XMGL077         | 1B | 12.9  |
| Xgpw1143        | 1B | 12.9  |
| Xhor12          | 1B | 12.9  |
| rPt-8399        | 1B | 13.2  |
| Xpsr963         | 1B | 13.9  |
| wPt-3477        | 1B | 14.4  |
| XksuG9          | 1B | 14.7  |
| M71/P77.9       | 1B | 15    |
| Xmwig938        | 1B | 15    |
| XgpwE12         | 1B | 16    |

|              |    |      |
|--------------|----|------|
| Xmta16       | 1B | 16   |
| Xopah20-1100 | 1B | 16   |
| wPt-8627     | 1B | 16.6 |
| Xgwm835      | 1B | 16.8 |
| wPt-2988     | 1B | 16.8 |
| wPt-8949     | 1B | 17.4 |
| wPt-8267     | 1B | 17.6 |
| wPt-1912     | 1B | 17.8 |
| wPt-1328     | 1B | 17.9 |
| wPt-7094     | 1B | 18.2 |
| wPt-4107     | 1B | 18.9 |
| Xgwm24       | 1B | 19.1 |
| wPt-1560     | 1B | 19.3 |
| wPt-2052     | 1B | 19.3 |
| Xgwm608      | 1B | 19.8 |
| M65/P64.4    | 1B | 21.2 |
| P34/M51-285  | 1B | 21.2 |
| Xfbb234      | 1B | 21.2 |
| Xfbb260      | 1B | 21.2 |
| Xgwm550      | 1B | 21.2 |
| Xwmc818      | 1B | 22.6 |
| Xgwm374a     | 1B | 22.7 |
| wPt-0359     | 1B | 23   |
| wPt-3465     | 1B | 23   |
| TC87195      | 1B | 23.2 |
| Xwmc51       | 1B | 23.5 |
| wPt-4366     | 1B | 23.6 |
| wPt-6592     | 1B | 23.7 |
| tPt-5675     | 1B | 23.8 |
| Xmwg60       | 1B | 23.8 |
| Xwmc49       | 1B | 24.3 |
| Xwmc798      | 1B | 24.7 |
| wPt-5347     | 1B | 24.7 |
| wPt-3753     | 1B | 25.3 |
| wPt-4434     | 1B | 25.4 |
| wPt-5067     | 1B | 25.4 |
| Xfbb160x     | 1B | 25.4 |
| Xbarc128     | 1B | 25.5 |
| Xgwm666d     | 1B | 25.6 |
| Xgwm1100     | 1B | 25.8 |
| Xwmc51b      | 1B | 26.2 |
| wPt-4811     | 1B | 26.5 |
| P41/M48-174  | 1B | 26.7 |
| Xwmc619      | 1B | 26.8 |
| wPt-0974     | 1B | 27.6 |

|          |    |      |
|----------|----|------|
| Xmwg837  | 1B | 27.9 |
| TC85294  | 1B | 28   |
| wPt-0655 | 1B | 29.3 |
| wPt-7833 | 1B | 29.5 |
| wPt-3177 | 1B | 30   |
| Xbarc60  | 1B | 30.8 |
| wPt-3282 | 1B | 31.6 |
| wPt-5164 | 1B | 31.6 |
| wPt-2230 | 1B | 31.8 |
| wPt-2999 | 1B | 32   |
| wPt-3824 | 1B | 32.1 |
| wPt-5312 | 1B | 32.1 |
| wPt-6427 | 1B | 32.1 |
| wPt-6434 | 1B | 32.1 |
| wPt-7529 | 1B | 32.1 |
| wPt-8986 | 1B | 32.1 |
| Xwmc406  | 1B | 32.3 |
| Xwmc500  | 1B | 32.3 |
| wPt-1781 | 1B | 32.5 |
| wPt-5065 | 1B | 32.5 |
| wPt-9903 | 1B | 32.5 |
| wPt-4605 | 1B | 32.7 |
| wPt-2614 | 1B | 32.9 |
| Xbarc8   | 1B | 34.1 |
| Xbarc119 | 1B | 34.3 |
| wPt-8930 | 1B | 34.7 |
| wPt-5485 | 1B | 35   |
| Xgwm413  | 1B | 36.5 |
| wPt-0222 | 1B | 36.6 |
| wPt-5678 | 1B | 36.6 |
| Xwmc329  | 1B | 36.7 |
| Xgdm36   | 1B | 36.8 |
| wPt-0260 | 1B | 36.9 |
| wPt-2706 | 1B | 36.9 |
| wPt-2744 | 1B | 36.9 |
| wPt-5385 | 1B | 36.9 |
| wPt-5899 | 1B | 36.9 |
| wPt-7242 | 1B | 36.9 |
| wPt-8087 | 1B | 36.9 |
| wPt-2762 | 1B | 37.1 |
| wPt-5363 | 1B | 37.1 |
| wPt-5562 | 1B | 37.1 |
| wPt-6777 | 1B | 37.1 |
| wPt-7038 | 1B | 37.1 |
| wPt-9977 | 1B | 37.1 |

|            |    |      |
|------------|----|------|
| wPt-3889   | 1B | 37.2 |
| Xgwm133    | 1B | 38.2 |
| Xgwm33b    | 1B | 38.2 |
| Rg1        | 1B | 38.8 |
| Xcdo99     | 1B | 38.8 |
| Xwmc222    | 1B | 38.8 |
| XWB152o    | 1B | 39.8 |
| Xgwm106    | 1B | 39.8 |
| Xgwm33     | 1B | 39.8 |
| P34/M50-10 | 1B | 40.8 |
| Xfba285    | 1B | 40.8 |
| Xgwm264    | 1B | 40.8 |
| Xcfa2158   | 1B | 41.8 |
| XgbxR698   | 1B | 41.8 |
| Xgwm49     | 1B | 41.8 |
| Xfbb237    | 1B | 42.8 |
| Xgpw2162   | 1B | 42.8 |
| Xwmc85     | 1B | 42.8 |
| Xcdo388    | 1B | 43.8 |
| Xcfd92     | 1B | 43.8 |
| Xgwm337    | 1B | 44.8 |
| Xgwm603    | 1B | 44.8 |
| M85/P65.5  | 1B | 45.8 |
| Xgpw1239   | 1B | 47.8 |
| Xmwg68     | 1B | 47.8 |
| Xmwg77     | 1B | 47.8 |
| Xabc156    | 1B | 48.8 |
| Xwmc391    | 1B | 48.8 |
| Xcfd59     | 1B | 48.8 |
| P78/M87.8  | 1B | 49.8 |
| XGli3.2    | 1B | 49.8 |
| XksuF43    | 1B | 49.8 |
| Xwmc500.2  | 1B | 49.9 |
| Xksu136    | 1B | 54   |
| XksuE18    | 1B | 55   |
| XksuE19    | 1B | 56   |
| Xmwg758    | 1B | 56   |
| Xmwg645    | 1B | 57   |
| Xbcd340    | 1B | 58   |
| Xabc155    | 1B | 59   |
| P40/M61-5  | 1B | 60   |
| P78/M43.7  | 1B | 60   |
| Xbcd1124   | 1B | 60   |
| Xcdo1188   | 1B | 60   |
| Xcfd20     | 1B | 60   |

|              |    |      |
|--------------|----|------|
| Xcsu109      | 1B | 61   |
| Xpsr688      | 1B | 61   |
| Xbcd1796     | 1B | 62   |
| Xbcd2        | 1B | 62   |
| Nor-B1       | 1B | 63   |
| Xcdo1340     | 1B | 63   |
| Xcmwg733     | 1B | 63   |
| Xwmc52       | 1B | 64   |
| Xfbb35       | 1B | 65   |
| XgbxG080     | 1B | 65   |
| Xglk431      | 1B | 65   |
| Xwmc230      | 1B | 65   |
| Yr9          | 1B | 65   |
| Xglk136a     | 1B | 66   |
| Xrz166       | 1B | 66   |
| P35/M48-2    | 1B | 67   |
| Xabg373      | 1B | 67   |
| Xbcd200      | 1B | 67   |
| Xglk163      | 1B | 67   |
| P32/M52-120  | 1B | 68   |
| Xcdo1473     | 1B | 68   |
| XS13M61(590) | 1B | 68   |
| XS25M51(280) | 1B | 68   |
| Xmgb2        | 1B | 68   |
| Xpsr957      | 1B | 68   |
| Xutv111      | 1B | 68   |
| Xutv1356     | 1B | 68   |
| Xutv618      | 1B | 68   |
| Xutv780      | 1B | 68   |
| Xwmc326      | 1B | 68   |
| wPt-1399     | 1B | 68   |
| wPt-3103     | 1B | 68   |
| wPt-4510     | 1B | 68   |
| wPt-4726     | 1B | 68   |
| wPt-5800     | 1B | 68   |
| wPt-6012     | 1B | 68   |
| wPt-6325     | 1B | 68   |
| Xbarc187     | 1B | 68   |
| Xgwm18       | 1B | 68   |
| Xutv1109     | 1B | 68.1 |
| wPt-5801     | 1B | 68.4 |
| XS13M61(370) | 1B | 69   |
| wPt-8682     | 1B | 69.4 |
| wPt-1116     | 1B | 69.6 |
| wPt-6117     | 1B | 70   |

|             |    |      |
|-------------|----|------|
| wPt-6833    | 1B | 70   |
| wPt-8616    | 1B | 70   |
| Xwmc128     | 1B | 70.2 |
| Xgdm28      | 1B | 70.3 |
| Xgwm494     | 1B | 70.3 |
| Xwmc31      | 1B | 70.3 |
| Xgdm33      | 1B | 70.3 |
| Xgdm33b     | 1B | 70.3 |
| Xpsr596a    | 1B | 70.7 |
| Xutv1518    | 1B | 71.1 |
| Xbcd1449    | 1B | 71.9 |
| Xbcd442a    | 1B | 71.9 |
| Xbcd762     | 1B | 71.9 |
| Xcmwg645    | 1B | 71.9 |
| Xfba177     | 1B | 71.9 |
| Xmwg695     | 1B | 71.9 |
| Xwg605      | 1B | 71.9 |
| Xgwm498     | 1B | 71.9 |
| Nor1        | 1B | 72   |
| Xcdo127     | 1B | 72.2 |
| Xgwm947     | 1B | 73   |
| Xbcd338     | 1B | 73.2 |
| Xwmc156.2   | 1B | 73.2 |
| Xcfd59c     | 1B | 73.2 |
| Xwmc419     | 1B | 73.2 |
| Xcdo1173    | 1B | 73.7 |
| Xcdo618     | 1B | 73.7 |
| Xcdo92      | 1B | 73.7 |
| Xfbb283     | 1B | 73.7 |
| Xwg811      | 1B | 73.7 |
| Xdupw532    | 1B | 73.7 |
| Xpsr949     | 1B | 73.7 |
| wPt-306450  | 1B | 74.1 |
| Xwmc611     | 1B | 74.5 |
| Xcdo98.2    | 1B | 74.6 |
| XgbxG178    | 1B | 74.6 |
| XgbxR059    | 1B | 74.6 |
| Xcfd2       | 1B | 75.6 |
| Xmex3M8f    | 1B | 75.6 |
| Xwmc320     | 1B | 75.6 |
| Xwmc269     | 1B | 75.9 |
| Xwmc597     | 1B | 76.3 |
| Xgwm273     | 1B | 76.5 |
| QLr.sfr-1BS | 1B | 77.5 |
| Xcfa2241    | 1B | 77.5 |

|           |    |      |
|-----------|----|------|
| Xfba28    | 1B | 77.5 |
| XgbxG263  | 1B | 77.5 |
| Xmwig837a | 1B | 77.5 |
| Yr15      | 1B | 77.5 |
| Xutv1181  | 1B | 78   |
| Xcfd65    | 1B | 78.5 |
| Xgdm136   | 1B | 78.5 |
| Xgwm762   | 1B | 78.6 |
| Xbarc120  | 1B | 78.8 |
| Xbcd12    | 1B | 78.9 |
| Xcdo278   | 1B | 78.9 |
| XWC0065   | 1B | 79.9 |
| Xcmwig758 | 1B | 79.9 |
| Xfba171   | 1B | 79.9 |
| Xfbb121   | 1B | 79.9 |
| Xgwm11    | 1B | 79.9 |
| wPt-1374  | 1B | 80.2 |
| Xbcd98b   | 1B | 80.6 |
| Xbarc137  | 1B | 80.6 |
| Xfba319   | 1B | 80.6 |
| Xfbb251   | 1B | 80.6 |
| Xwg822    | 1B | 80.6 |
| Xwmc626   | 1B | 81.1 |
| CA679329a | 1B | 81.4 |
| Xwmc216   | 1B | 81.4 |
| Xwmc213   | 1B | 82.1 |
| Xwmc813   | 1B | 82.2 |
| wPt-3084  | 1B | 82.7 |
| Xwmc694   | 1B | 82.8 |
| Xwmc156   | 1B | 83.1 |
| Xgwm582   | 1B | 83.4 |
| Xwmc265   | 1B | 83.5 |
| Xgwm374   | 1B | 84   |
| Xbarc240  | 1B | 84.2 |
| Xbcd386   | 1B | 84.2 |
| Xgbx3147  | 1B | 84.2 |
| BJ318987  | 1B | 84.3 |
| Xfbb180   | 1B | 84.6 |
| Xfbb67    | 1B | 84.6 |
| Xgwm403a  | 1B | 84.6 |
| XksuF43a  | 1B | 84.6 |
| Yr24      | 1B | 84.6 |
| wPt-5296  | 1B | 84.7 |
| P43/M62-3 | 1B | 84.9 |
| Xbcd1889  | 1B | 84.9 |

|                  |    |      |
|------------------|----|------|
| Xwmc277          | 1B | 84.9 |
| Xbarc181         | 1B | 84.9 |
| Xcfa2129         | 1B | 85.9 |
| Xgwm131          | 1B | 86.1 |
| wPt-2389         | 1B | 86.2 |
| Xcfd48           | 1B | 86.5 |
| Xbarc83          | 1B | 86.7 |
| Xbarc174         | 1B | 86.9 |
| Xpsr2019.2(Aba8) | 1B | 86.9 |
| Xutv786          | 1B | 87.2 |
| P37/M64-249      | 1B | 87.9 |
| Rf3              | 1B | 87.9 |
| XPc-B4e          | 1B | 87.9 |
| Xbarc302         | 1B | 87.9 |
| Xfba245          | 1B | 87.9 |
| Xmta17           | 1B | 87.9 |
| Xmwig68a         | 1B | 87.9 |
| Xgdm101          | 1B | 88   |
| P44/M54-1        | 1B | 88.9 |
| Xfbb329          | 1B | 88.9 |
| Xfbb90           | 1B | 88.9 |
| Xglk136          | 1B | 88.9 |
| Xpsr325          | 1B | 88.9 |
| Glu-B1           | 1B | 89.9 |
| Xcdo637          | 1B | 89.9 |
| Xfbb255          | 1B | 89.9 |
| Xmwig938b        | 1B | 89.9 |
| wPt-8168         | 1B | 89.9 |
| Xmag620          | 1B | 90.7 |
| Xmgb40           | 1B | 90.7 |
| Xwmc416          | 1B | 90.7 |
| wPt-3451         | 1B | 90.8 |
| wPt-6240         | 1B | 90.8 |
| wPt-9792         | 1B | 91.2 |
| Xutv1334         | 1B | 91.8 |
| Xpsr648          | 1B | 92   |
| wPt-0705         | 1B | 92   |
| wPt-2315         | 1B | 92   |
| wPt-303890       | 1B | 92.2 |
| Xwmc134          | 1B | 92.5 |
| Swes578          | 1B | 93.6 |
| wPt-3579         | 1B | 93.8 |
| Xcdo388a         | 1B | 93.9 |
| Xgdm126.1        | 1B | 93.9 |
| Xpsr967          | 1B | 93.9 |



|             |    |       |
|-------------|----|-------|
| Xpsr162     | 1B | 93.9  |
| wPt-0202    | 1B | 94.1  |
| wPt-3227    | 1B | 94.1  |
| wPt-0506    | 1B | 94.5  |
| wPt-0463    | 1B | 94.7  |
| wPt-3566    | 1B | 95.3  |
| Xdupw214    | 1B | 96.4  |
| Xgwm403     | 1B | 96.9  |
| P31/M53-3   | 1B | 98.4  |
| Xfba34a     | 1B | 98.4  |
| XksuE11a    | 1B | 98.4  |
| CA651264    | 1B | 99.4  |
| M17/P65.1   | 1B | 99.4  |
| Xbcd1150a   | 1B | 99.4  |
| XksuA1      | 1B | 99.4  |
| Xwmc85a     | 1B | 99.4  |
| P39/M50-10  | 1B | 100.4 |
| Xbcd1150b   | 1B | 100.4 |
| Xbcd1150    | 1B | 101.4 |
| Xwmc206     | 1B | 103.4 |
| Xbcd265d    | 1B | 104   |
| Xgwm274     | 1B | 104.1 |
| wPt-5011    | 1B | 104.1 |
| Xgwm153     | 1B | 104.8 |
| Xbarc81     | 1B | 105.1 |
| P32/M54-5   | 1B | 105.2 |
| P35/M51-2   | 1B | 105.2 |
| P38/M47-9   | 1B | 105.2 |
| P41/M51-182 | 1B | 105.2 |
| Xbcd265     | 1B | 105.2 |
| Xcdo1160    | 1B | 105.2 |
| Xcdo393     | 1B | 105.2 |
| Xmwg733     | 1B | 105.2 |
| Xbcd304     | 1B | 105.2 |
| Xbcd310     | 1B | 105.2 |
| wPt-1247    | 1B | 107.7 |
| wPt-1818    | 1B | 107.7 |
| wPt-9409    | 1B | 107.7 |
| Xwmc631     | 1B | 107.8 |
| Xwmc766     | 1B | 107.8 |
| Xwmc673     | 1B | 107.9 |
| Xbarc188    | 1B | 108.1 |
| XksuG34     | 1B | 108.2 |
| wPt-1403    | 1B | 108.3 |
| wPt-9032    | 1B | 108.5 |

|           |    |       |
|-----------|----|-------|
| wPt-6975  | 1B | 108.6 |
| CA679329b | 1B | 108.8 |
| P78/M72.4 | 1B | 108.9 |
| rPt-7906  | 1B | 109.2 |
| Xbcd441   | 1B | 109.9 |
| XgbxG160  | 1B | 109.9 |
| Xgwm806   | 1B | 110.2 |
| Xgwm268   | 1B | 111.2 |
| XWB188h   | 1B | 111.8 |
| Xbarc61   | 1B | 111.8 |
| Xwhs179   | 1B | 111.8 |
| Xgwm124   | 1B | 111.8 |
| P78/M92.2 | 1B | 112.8 |
| Xcmwg733a | 1B | 112.8 |
| Xmwg676   | 1B | 112.8 |
| Xcdo1196  | 1B | 113.8 |
| Xmwg69    | 1B | 115.8 |
| M67/P77.5 | 1B | 116.8 |
| Xbcd442   | 1B | 116.8 |
| Xgpw2071  | 1B | 116.8 |
| M51/P65.3 | 1B | 117.8 |
| Xutv1425  | 1B | 118.3 |
| BE419757  | 1B | 118.4 |
| Xfba178   | 1B | 119.7 |
| Xutv704   | 1B | 119.7 |
| wPt-0459  | 1B | 120.1 |
| Xgwm544   | 1B | 121.3 |
| Xbcd21    | 1B | 121.4 |
| Xglk259   | 1B | 121.4 |
| Xmwg984   | 1B | 121.4 |
| Xfbb275   | 1B | 122.4 |
| Xfba309   | 1B | 123.4 |
| wPt-2257  | 1B | 124.1 |
| Xfbb260a  | 1B | 124.3 |
| wPt-7066  | 1B | 124.7 |
| wPt-9809  | 1B | 124.9 |
| Xbcd508   | 1B | 127.1 |
| Xfba294   | 1B | 127.1 |
| wPt-0097  | 1B | 127.2 |
| Xfba134   | 1B | 128.9 |
| Xpsp3100  | 1B | 128.9 |
| Xbcd1261  | 1B | 130.9 |
| Xcdo1189  | 1B | 130.9 |
| Xbcd1514  | 1B | 131.9 |
| Xcfa2147  | 1B | 132.9 |

|              |    |       |
|--------------|----|-------|
| wPt-3475     | 1B | 132.9 |
| wPt-0944     | 1B | 133   |
| wPt-2526     | 1B | 133.5 |
| wPt-4129     | 1B | 133.9 |
| wPt-4532     | 1B | 134   |
| F79          | 1B | 134.6 |
| wPt-5034     | 1B | 134.8 |
| wPt-5061     | 1B | 134.9 |
| rPt-2940     | 1B | 135.2 |
| wPt-5281     | 1B | 135.5 |
| XS13M61(430) | 1B | 135.9 |
| wPt-5316b    | 1B | 136.5 |
| TC81688      | 1B | 139.2 |
| wPt-5907     | 1B | 140.8 |
| wPt-2205     | 1B | 141.4 |
| wPt-4688     | 1B | 143.1 |
| Xbcd1562     | 1B | 144.4 |
| F109         | 1B | 144.6 |
| wPt-8832     | 1B | 149.7 |
| rPt-5412     | 1B | 150.3 |
| Xwmc830      | 1B | 150.6 |
| Xwmc719      | 1B | 150.7 |
| Xwmc44       | 1B | 153.2 |
| Xhbe248      | 1B | 170.4 |
| TC88378      | 1B | 174.6 |
| Xcfa2292     | 1B | 175.7 |
| Xcdo346      | 1B | 176.7 |
| Xfba268      | 1B | 178.7 |
| Xfba34       | 1B | 178.7 |
| Xwmc367      | 1B | 180.2 |
| Xgwm259      | 1B | 184.4 |
| Xgwm328      | 1B | 184.7 |
| Xgpw1077     | 1B | 185.7 |
| Xgwm793      | 1B | 185.7 |
| wPt-3571     | 1B | 186.3 |
| Xfba266      | 1B | 186.7 |
| wPt-4721     | 1B | 186.8 |
| wPt-6142     | 1B | 186.8 |
| Xwmc728      | 1B | 188.4 |
| XksuE11      | 1B | 188.4 |
| Xmwig912     | 1B | 189.4 |
| Xksul27      | 1B | 190.4 |
| P36/M67-1    | 1B | 191.4 |
| Xwmc113      | 1B | 191.4 |
| Xgwm140      | 1B | 191.4 |

|               |    |       |
|---------------|----|-------|
| Xbarc80       | 1B | 193.9 |
| Lr46          | 1B | 194.9 |
| Yr29          | 1B | 194.9 |
| wPt-9028      | 1B | 195.2 |
| wPt-5253      | 1B | 195.3 |
| wPt-8866      | 1B | 195.4 |
| wPt-2968      | 1B | 195.9 |
| wPt-5915      | 1B | 196.3 |
| wPt-1973      | 1B | 196.4 |
| wPt-5721      | 1B | 196.6 |
| wPt-3950      | 1B | 196.8 |
| tPt-6091      | 1B | 197.3 |
| wPt-1672      | 1B | 197.3 |
| wPt-1786      | 1B | 197.4 |
| wPt-4361      | 1B | 197.5 |
| Xgwm659       | 1B | 198.2 |
| wPt-2485      | 1B | 198.7 |
| CA677684a     | 1B | 199.8 |
| Xcwem32       | 1B | 202.6 |
| wPt-4651      | 1B | 202.7 |
| wPt-5577b     | 1B | 203.2 |
| wPt-1313      | 1B | 203.3 |
| wPt-1770      | 1B | 203.3 |
| wPt-7746      | 1B | 203.3 |
| wPt-8245      | 1B | 203.3 |
| Swes947       | 1B | 204.6 |
| Xpsr593       | 1B | 228.5 |
| CD9b          | 1B | 274.9 |
| D1.1_ctg10323 | 1D | 0     |
| D1.1_ctg10469 | 1D | 0     |
| D1.1_ctg18    | 1D | 0     |
| D1.1_ctg6064  | 1D | 0     |
| D1.1_ctg8441  | 1D | 0     |
| D1.1_ctg8730  | 1D | 0     |
| D1.1_ctg9093  | 1D | 0     |
| Lr21          | 1D | 0     |
| Lr60          | 1D | 0     |
| Xbcd1431c     | 1D | 0     |
| Xfbb322       | 1D | 0     |
| Xgwm155       | 1D | 0     |
| Xmtd161b      | 1D | 0     |
| Xbcd1661      | 1D | 1     |
| XgbxG035d     | 1D | 1     |
| Xwg184        | 1D | 1     |
| Xcfa2170      | 1D | 2     |

|                |    |     |
|----------------|----|-----|
| Xfba167        | 1D | 2   |
| Xfbb293        | 1D | 2   |
| Xgpw2255       | 1D | 3   |
| Xwmc153        | 1D | 3   |
| Xwmc173        | 1D | 3   |
| Xfbb250a       | 1D | 4   |
| Xmwig570       | 1D | 4   |
| Xubp19.2       | 1D | 4   |
| D1.1_ctg3776_1 | 1D | 5   |
| P32/M49-1      | 1D | 5   |
| P34/M51-304    | 1D | 5   |
| P39/M49-178    | 1D | 5   |
| XksuE19        | 1D | 5   |
| D1.1_ctg11242  | 1D | 6   |
| D1.1_ctg19     | 1D | 6   |
| D1.1_ctg794    | 1D | 6   |
| D1.1_ctg9381   | 1D | 6   |
| Xcdo388b       | 1D | 6   |
| XgbxR698b      | 1D | 6   |
| Xmwig938b      | 1D | 6   |
| Xpsr11(Glu-3)  | 1D | 6   |
| Rg2            | 1D | 7   |
| Xfba199        | 1D | 7   |
| Xmwig68        | 1D | 7   |
| Xmwig837b      | 1D | 7   |
| Xabc156        | 1D | 7   |
| XksuD14a       | 1D | 7   |
| Xgwm147        | 1D | 9.8 |
| D1.1_ctg11208  | 1D | 11  |
| D1.1_ctg11431  | 1D | 11  |
| D1.1_ctg12342  | 1D | 11  |
| D1.1_ctg3156   | 1D | 11  |
| D1.1_ctg4584   | 1D | 11  |
| D1.1_ctg4680   | 1D | 11  |
| D1.1_ctg6495   | 1D | 11  |
| D1.1_ctg8678   | 1D | 11  |
| Xfbb234b       | 1D | 11  |
| Xfbb237a       | 1D | 11  |
| Xfbb67c        | 1D | 11  |
| XgbxG746       | 1D | 11  |
| Xgpw2067a      | 1D | 11  |
| Xhor12b        | 1D | 11  |
| XksuF43a       | 1D | 11  |
| Xmta16b        | 1D | 11  |
| Xbcd1434       | 1D | 11  |

|           |    |      |
|-----------|----|------|
| wPt-9181  | 1D | 11   |
| Glu-D3    | 1D | 12.3 |
| Gli-D1    | 1D | 13.1 |
| H22       | 1D | 13.8 |
| Xmwig60b  | 1D | 13.8 |
| Xwhs179.1 | 1D | 13.8 |
| Xwmc85    | 1D | 13.8 |
| Xfba329   | 1D | 14.8 |
| Xfbb196   | 1D | 14.8 |
| Xfbb260b  | 1D | 14.8 |
| Xfbb319b  | 1D | 14.8 |
| Xgpw1170  | 1D | 14.8 |
| Xgpw363   | 1D | 14.8 |
| Xgwm264   | 1D | 14.8 |
| Xgdm33    | 1D | 16.7 |
| Xgdm33c   | 1D | 17.4 |
| Xbarc149  | 1D | 25.7 |
| Xwmc147   | 1D | 28.7 |
| Xgwm33    | 1D | 34.3 |
| Xpsr1327  | 1D | 34.8 |
| Xwmc432   | 1D | 34.8 |
| P34/M511  | 1D | 35.8 |
| Xgwm33c   | 1D | 35.9 |
| P39/M49-8 | 1D | 36.4 |
| Xfba40b   | 1D | 36.4 |
| Xcfd15    | 1D | 36.4 |
| Xwmc336   | 1D | 36.4 |
| Xgwm33.3  | 1D | 37.4 |
| Xcfd61    | 1D | 39.7 |
| Xcni7.1   | 1D | 40.4 |
| Xcfd58    | 1D | 41.1 |
| Xmwig837  | 1D | 41.4 |
| Xcfd21    | 1D | 41.6 |
| Sr33      | 1D | 45.4 |
| Xmta16x   | 1D | 45.4 |
| Xwhs179.2 | 1D | 45.4 |
| Xbarc152  | 1D | 45.4 |
| wPt-3707  | 1D | 45.5 |
| wPt-3790  | 1D | 45.5 |
| Ogliadc   | 1D | 45.6 |
| XgpwE8b   | 1D | 45.6 |
| Xpsp3000  | 1D | 45.6 |
| Xwmc222   | 1D | 45.6 |
| wPt-3738  | 1D | 46.7 |
| Xabc156b  | 1D | 47.3 |

|                |    |      |
|----------------|----|------|
| Xcfd92         | 1D | 47.6 |
| wPt-4196       | 1D | 48.2 |
| P32/M59-2      | 1D | 50.8 |
| P34/M47-3      | 1D | 50.8 |
| Xgwm106        | 1D | 50.8 |
| D1.1_ctg3776_2 | 1D | 51.8 |
| XSi_2          | 1D | 51.8 |
| XksuE19b       | 1D | 51.8 |
| XgAmmA         | 1D | 52.8 |
| XksuE18a       | 1D | 54.8 |
| P32/M55-3      | 1D | 58.8 |
| Xmta14a        | 1D | 58.8 |
| XksuD14B       | 1D | 60.8 |
| Xhor12d        | 1D | 61.8 |
| Xubp19.1       | 1D | 66.8 |
| D1.1_ctg5162   | 1D | 69.8 |
| D1.1_ctg5357   | 1D | 69.8 |
| XksuG9         | 1D | 69.8 |
| Xgwm848        | 1D | 70.9 |
| Xbarc119       | 1D | 73.3 |
| Xcdo89         | 1D | 73.6 |
| wPt-0413       | 1D | 73.9 |
| wPt-9380       | 1D | 73.9 |
| wPt-7038b      | 1D | 74.2 |
| Xgwm191        | 1D | 74.4 |
| Xbcd200        | 1D | 74.6 |
| wPt-5503       | 1D | 75.3 |
| P37/M64-288    | 1D | 75.6 |
| Xgwm337        | 1D | 76.2 |
| Xbarc229.1     | 1D | 76.6 |
| Xcdo580        | 1D | 77.6 |
| Xwmc489        | 1D | 77.9 |
| Pm24           | 1D | 78.2 |
| Xcfd59b        | 1D | 78.2 |
| Xcdo1173       | 1D | 78.6 |
| Xgwm603        | 1D | 79   |
| Xcfd59         | 1D | 79.6 |
| D1.1_ctg10420  | 1D | 79.7 |
| D1.1_ctg620    | 1D | 79.7 |
| D1.1_ctg7447   | 1D | 79.7 |
| D1.1_ctg8782   | 1D | 79.7 |
| P34/M50-8      | 1D | 79.7 |
| P36/M68-2      | 1D | 79.7 |
| P39/M39-5      | 1D | 79.7 |
| P40/M51-8      | 1D | 79.7 |

|              |    |      |
|--------------|----|------|
| P41/M61-7    | 1D | 79.7 |
| Xbcd22       | 1D | 79.7 |
| Xbarc99      | 1D | 79.7 |
| Xcfd72       | 1D | 79.8 |
| Xcfd65       | 1D | 81.1 |
| Xwmc429      | 1D | 81.5 |
| P35/M39-5    | 1D | 82.5 |
| Xbarc148     | 1D | 85.1 |
| Xgwm608      | 1D | 85.3 |
| Xbarc229     | 1D | 85.5 |
| XcsEND2-4    | 1D | 85.6 |
| Xbarc162     | 1D | 85.6 |
| Xgwm458      | 1D | 86.3 |
| Xbarc240     | 1D | 86.9 |
| Xwmc339      | 1D | 87.3 |
| Xwmc590      | 1D | 88   |
| D1.1_ctg5940 | 1D | 89.6 |
| D1.1_ctg839  | 1D | 89.6 |
| Xfbb377d     | 1D | 89.6 |
| Xbarc169     | 1D | 90.6 |
| Xwmc216      | 1D | 91.4 |
| wPt-7711     | 1D | 91.4 |
| wPt-8854     | 1D | 91.4 |
| wPt-0077     | 1D | 91.6 |
| Xcfd19       | 1D | 91.8 |
| Xbcd402      | 1D | 93.1 |
| wPt-3945     | 1D | 94.1 |
| P31/M52-3    | 1D | 94.1 |
| wPt-9857     | 1D | 94.3 |
| wPt-4988     | 1D | 95   |
| P36/M54-8    | 1D | 95.1 |
| D1.1_ctg3072 | 1D | 96.1 |
| D1.1_ctg4533 | 1D | 96.1 |
| D1.1_ctg4968 | 1D | 96.1 |
| D1.1_ctg8047 | 1D | 96.1 |
| D1.1_ctg9710 | 1D | 96.1 |
| Xfba383      | 1D | 96.1 |
| Xfba8        | 1D | 96.1 |
| Xpsr634      | 1D | 96.1 |
| Xfba118a     | 1D | 97.1 |
| wPt-3743     | 1D | 97.6 |
| Xglk558      | 1D | 98.1 |
| Glu-D1       | 1D | 98.7 |
| D1.1_ctg1364 | 1D | 99.1 |
| D1.1_ctg6012 | 1D | 99.1 |



|               |    |       |
|---------------|----|-------|
| D1.1_ctg7989  | 1D | 99.1  |
| Xbcd1150Dra   | 1D | 99.1  |
| Xfba250b      | 1D | 99.1  |
| Xwmc36        | 1D | 100.1 |
| Xcfa2129      | 1D | 100.3 |
| Xcfd48        | 1D | 100.4 |
| D1.1_ctg11375 | 1D | 101.1 |
| Xmwg967       | 1D | 101.1 |
| Xbarc62       | 1D | 101.1 |
| Xgdm126       | 1D | 102.1 |
| Xcfd19a       | 1D | 103   |
| Xwmc93        | 1D | 104   |
| Xfbb194       | 1D | 104.5 |
| Xwmc261       | 1D | 104.5 |
| Xwmc673       | 1D | 104.5 |
| Xwmc732       | 1D | 104.7 |
| Xpsr544       | 1D | 105.3 |
| Xcfd48b       | 1D | 105.7 |
| Xcdo312       | 1D | 106.3 |
| Xgpw357       | 1D | 107.3 |
| Xgpw2118      | 1D | 109.3 |
| XksuD49       | 1D | 109.3 |
| wPt-6059      | 1D | 109.8 |
| Xgwm55        | 1D | 110   |
| D1.1_ctg7441  | 1D | 110.3 |
| Xgpw315       | 1D | 110.3 |
| XksuG55       | 1D | 110.3 |
| Xmta17c       | 1D | 110.3 |
| Xcfd63        | 1D | 110.9 |
| D1.1_ctg4643  | 1D | 111.8 |
| D1.1_ctg6587  | 1D | 111.8 |
| Xfbb90b       | 1D | 111.8 |
| XksuG2        | 1D | 111.8 |
| Xgwm642       | 1D | 111.8 |
| Xcfd28        | 1D | 113.8 |
| Xcfd83        | 1D | 113.8 |
| Xfba268       | 1D | 113.8 |
| Xfbb12        | 1D | 113.8 |
| P36/M47-5     | 1D | 114.8 |
| Xgpw360       | 1D | 114.8 |
| D1.1_ctg1648  | 1D | 115.8 |
| D1.1_ctg2680  | 1D | 115.8 |
| Xbcd1930      | 1D | 115.8 |
| Xmwg733c      | 1D | 115.8 |
| D1.1_ctg1075  | 1D | 116.8 |

|              |    |       |
|--------------|----|-------|
| D1.1_ctg5094 | 1D | 116.8 |
| Xcdo105      | 1D | 116.8 |
| Xgwm820      | 1D | 116.8 |
| Xwmc813      | 1D | 117.9 |
| Xcmwg733.3   | 1D | 117.9 |
| Xcmwg695     | 1D | 118.9 |
| Xmwg676d     | 1D | 119.9 |
| Xcsd19(Adh)  | 1D | 120.9 |
| Xmwg701      | 1D | 120.9 |
| Xbarc66      | 1D | 122.9 |
| Xfbb275c     | 1D | 122.9 |
| Xpsr95_Em    | 1D | 122.9 |
| XATPase      | 1D | 123.9 |
| Xcmwg701     | 1D | 125.9 |
| wPt-10060    | 1D | 126.5 |
| wPt-1070     | 1D | 126.5 |
| wPt-1597     | 1D | 126.5 |
| wPt-2541     | 1D | 126.5 |
| wPt-2839     | 1D | 126.5 |
| wPt-3636     | 1D | 126.5 |
| wPt-4427     | 1D | 126.5 |
| wPt-6503     | 1D | 126.5 |
| wPt-7057     | 1D | 126.5 |
| wPt-7421     | 1D | 126.5 |
| wPt-1531     | 1D | 126.6 |
| wPt-1685     | 1D | 126.6 |
| wPt-2897     | 1D | 126.6 |
| wPt-1263     | 1D | 126.7 |
| wPt-4687     | 1D | 126.8 |
| wPt-6560     | 1D | 126.8 |
| wPt-7092     | 1D | 126.9 |
| Xbcd1261A    | 1D | 127.9 |
| Xmwg693      | 1D | 127.9 |
| Xpsp3037     | 1D | 127.9 |
| wPt-7437     | 1D | 127.9 |
| Xbarc271     | 1D | 128.8 |
| Xfba279a     | 1D | 128.8 |
| wPt-7697     | 1D | 131.1 |
| D1.1_ctg1298 | 1D | 131.7 |
| Xbcd508c     | 1D | 131.7 |
| Xbarc346     | 1D | 137.7 |
| P36/M35-3    | 1D | 138.7 |
| Xgwm232      | 1D | 138.7 |
| Xcfa2187c    | 1D | 139.7 |
| Xcmwg693     | 1D | 139.7 |

|              |    |       |
|--------------|----|-------|
| P41/M35-1    | 1D | 140.7 |
| P32/M53-2    | 1D | 141.7 |
| P38/M54-6    | 1D | 141.7 |
| P41/M40-4    | 1D | 141.7 |
| P33/M49-3    | 1D | 142.7 |
| P34/M51-205  | 1D | 142.7 |
| P36/M49-3    | 1D | 142.7 |
| P36/M50-5    | 1D | 142.7 |
| P36/M54-7    | 1D | 142.7 |
| P37/M51-6    | 1D | 142.7 |
| P38/M50-2    | 1D | 142.7 |
| Xcdo393A     | 1D | 142.7 |
| P32/M52-145  | 1D | 143.7 |
| P34/M51-8    | 1D | 143.7 |
| P35/M76-2    | 1D | 143.7 |
| P42/M50-6    | 1D | 143.7 |
| Xcfd282      | 1D | 143.7 |
| Xcdo1420     | 1D | 144.7 |
| Xgpw1077     | 1D | 145.7 |
| Xgpw2196     | 1D | 145.7 |
| XksuE11.1D   | 1D | 146.7 |
| D1.1_ctg5083 | 1D | 147.7 |
| Xgpw2224     | 1D | 147.7 |
| Xksul27.1    | 1D | 147.7 |
| Xgdm126.2    | 1D | 149.7 |
| Xwg241b      | 1D | 150.7 |
| XgbxG097b    | 1D | 151.7 |
| Xcfa2147b    | 1D | 157   |
| Xcfd32       | 1D | 157.7 |
| Xcfa2147     | 1D | 158   |
| Xwmc609      | 1D | 159   |
| Xwmc405      | 1D | 160.9 |
| Xgdm111      | 1D | 161.8 |
| Xgwm241      | 1D | 165.2 |
| wPt-8545     | 1D | 165.3 |
| wPt-4180     | 1D | 177.5 |
| Xcfd27       | 1D | 188.8 |
| wPt-3157     | 1D | 194.4 |
| wPt-0003     | 2A | 0     |
| wPt-7901     | 2A | 1.4   |
| wPt-6687     | 2A | 1.8   |
| wPt-9793     | 2A | 2.3   |
| Xfba88       | 2A | 30.4  |
| Xwmc382      | 2A | 31.4  |
| Xcmwg682a    | 2A | 32.4  |

|                |    |      |
|----------------|----|------|
| XWB124pbb      | 2A | 33.4 |
| Xcdo456a       | 2A | 33.4 |
| Xfba70a        | 2A | 33.4 |
| Xfba82a        | 2A | 33.4 |
| Xwmc407        | 2A | 33.4 |
| Xcdo447a       | 2A | 34.4 |
| Xgwm210        | 2A | 34.4 |
| Yr17/Lr37/Sr38 | 2A | 34.4 |
| Xbarc1138a     | 2A | 35.4 |
| Xgpw1162       | 2A | 35.4 |
| Xgwm496        | 2A | 35.4 |
| Xgpw2125       | 2A | 36.4 |
| Xbcd718        | 2A | 37.4 |
| P78/M87.3      | 2A | 38.4 |
| XgbxG747b      | 2A | 38.4 |
| Xgwm614        | 2A | 40.4 |
| Lr17a          | 2A | 41.1 |
| wPt-0071       | 2A | 41.1 |
| Xwmc667        | 2A | 43   |
| Xpsr131        | 2A | 43.2 |
| Xgwm497        | 2A | 43.9 |
| Xfbb61         | 2A | 44.9 |
| Xwmc154        | 2A | 45   |
| wPt-6148       | 2A | 45   |
| wPt-8328       | 2A | 45   |
| Xbarc124       | 2A | 45.9 |
| Xcfd36         | 2A | 45.9 |
| Xfba198        | 2A | 45.9 |
| Xfba329        | 2A | 45.9 |
| Xfbb289        | 2A | 45.9 |
| Xbarc1138      | 2A | 46.9 |
| Xbarc212       | 2A | 46.9 |
| wPt-2147       | 2A | 48.2 |
| Xbcd348a       | 2A | 48.4 |
| Xcfa2201       | 2A | 48.4 |
| Xgbx3818y      | 2A | 48.4 |
| Xgpw2018       | 2A | 48.4 |
| Xwmc326        | 2A | 49.3 |
| wPt-8925       | 2A | 50   |
| wPt-9277       | 2A | 50.1 |
| wPt-7175       | 2A | 50.3 |
| tPt-2481       | 2A | 50.4 |
| tPt-4602       | 2A | 50.5 |
| Xcdo1090       | 2A | 50.7 |
| Xfba280        | 2A | 50.7 |

|               |    |      |
|---------------|----|------|
| XksuH9        | 2A | 50.7 |
| Xgwm636       | 2A | 50.7 |
| Xbcd1970a     | 2A | 51.7 |
| Xfbb72        | 2A | 51.7 |
| XksuD18       | 2A | 51.7 |
| Xgwm296       | 2A | 51.7 |
| Xcdo57        | 2A | 52.7 |
| Xfba3         | 2A | 53.7 |
| Xpsp3153      | 2A | 54.7 |
| Xgpw2127      | 2A | 55.7 |
| Xgwm359       | 2A | 55.7 |
| Xbarc231      | 2A | 56.7 |
| Xfba178       | 2A | 56.7 |
| P78/M92.10    | 2A | 57.7 |
| Xgpw2089      | 2A | 57.7 |
| Xbcd152a      | 2A | 59.7 |
| Xfbb226a      | 2A | 59.7 |
| Xbcd1184a     | 2A | 60.7 |
| Xpsr109(RbcS) | 2A | 60.7 |
| Xpsr133       | 2A | 60.7 |
| Xpsr332       | 2A | 60.7 |
| Xwsu1(Dor6).1 | 2A | 60.7 |
| Yr32          | 2A | 60.7 |
| XgbxG036a     | 2A | 61.7 |
| Xcdo1281a     | 2A | 62.7 |
| XPAACTelo1    | 2A | 63.7 |
| Xbcd161a      | 2A | 63.7 |
| Xbcd1688a     | 2A | 63.7 |
| Xbcd855a      | 2A | 63.7 |
| Xcdo405a      | 2A | 63.7 |
| Xfba106a      | 2A | 63.7 |
| Xfba374a      | 2A | 63.7 |
| Xfbb329       | 2A | 63.7 |
| XgbxG281      | 2A | 63.7 |
| Xabc170       | 2A | 65.7 |
| Xfba272       | 2A | 65.7 |
| Xwmc69        | 2A | 65.7 |
| P78/M43.9     | 2A | 67.7 |
| Xbcd1184      | 2A | 67.7 |
| Xfba300       | 2A | 67.7 |
| TC90640       | 2A | 69.7 |
| TC90641       | 2A | 69.7 |
| Xbarc128      | 2A | 69.7 |
| Xdupw210      | 2A | 69.7 |
| Xmag3807      | 2A | 69.7 |

|               |    |      |
|---------------|----|------|
| Xcdo665       | 2A | 69.7 |
| tPt-1041      | 2A | 69.8 |
| wPt-4197      | 2A | 69.8 |
| wPt-6245      | 2A | 69.9 |
| wPt-8049      | 2A | 69.9 |
| wPt-4984      | 2A | 70   |
| wPt-9672      | 2A | 70.1 |
| Xgwm512       | 2A | 70.3 |
| Xmag3996      | 2A | 70.3 |
| wPt-1601a     | 2A | 70.3 |
| wPt-4533      | 2A | 70.3 |
| Xcdo1376a     | 2A | 72.9 |
| Xbcd152       | 2A | 74.9 |
| Xrz395a       | 2A | 74.9 |
| Xwmc728       | 2A | 75.4 |
| Xwmc177       | 2A | 75.9 |
| wPt-0102      | 2A | 76   |
| wPt-0277      | 2A | 76   |
| wPt-3611      | 2A | 76   |
| wPt-3744      | 2A | 76   |
| Xwmc598       | 2A | 76.4 |
| Xwmc630       | 2A | 76.5 |
| Xgwm71        | 2A | 76.9 |
| tPt-5584      | 2A | 76.9 |
| Xwmc602       | 2A | 77.3 |
| wPt-1368      | 2A | 77.4 |
| Xwmc149       | 2A | 77.8 |
| Xgwm328a      | 2A | 78.8 |
| wPt-5839      | 2A | 79   |
| wPt-0274      | 2A | 79.1 |
| wPt-3896      | 2A | 79.5 |
| Xgwm372a      | 2A | 79.7 |
| XksuG5a       | 2A | 80.7 |
| Xopag08-300   | 2A | 80.7 |
| Xwmc826       | 2A | 81.2 |
| wPt-7026      | 2A | 81.4 |
| CA658758      | 2A | 82   |
| Xfbb359a      | 2A | 82.4 |
| wPt-7285      | 2A | 82.4 |
| wPt-7306      | 2A | 82.7 |
| Xfbb226       | 2A | 83.3 |
| Xgbx3832      | 2A | 83.3 |
| wPt-4201      | 2A | 83.5 |
| M83/P65.2     | 2A | 84.2 |
| Xwsu1(Dor6).2 | 2A | 84.2 |

|             |    |      |
|-------------|----|------|
| Xwmc827     | 2A | 85.4 |
| XgbxG542    | 2A | 85.9 |
| Xgpw2111    | 2A | 86.9 |
| Xopal19-700 | 2A | 86.9 |
| Xgpw2204    | 2A | 87.9 |
| Xgwm294a    | 2A | 87.9 |
| Xwmc453     | 2A | 87.9 |
| wPt-9320    | 2A | 88.4 |
| Xbcd1688    | 2A | 89   |
| Xcdo405     | 2A | 89   |
| Xgpw2225    | 2A | 89   |
| Xgpw2253    | 2A | 89   |
| wPt-3037    | 2A | 89.4 |
| wPt-2435    | 2A | 89.7 |
| Xfba106     | 2A | 90   |
| Xwmc522     | 2A | 90   |
| Xmag2090    | 2A | 90.2 |
| Xwmc32      | 2A | 90.5 |
| wPt-2120a   | 2A | 90.8 |
| TC82001     | 2A | 91.2 |
| Xwmc474     | 2A | 91.5 |
| Xwmc296     | 2A | 91.9 |
| Xwmc792     | 2A | 92.4 |
| Xgwm339     | 2A | 94   |
| Xgwm515     | 2A | 94.4 |
| Xfba374     | 2A | 94.6 |
| Xfbb359     | 2A | 94.6 |
| Xgwm10      | 2A | 94.6 |
| Xgwm425     | 2A | 94.6 |
| Xgwm448     | 2A | 94.7 |
| Xgwm275     | 2A | 94.8 |
| Xgwm95      | 2A | 95.2 |
| Xcfd2       | 2A | 96.2 |
| Xbcd161     | 2A | 97.2 |
| Xcdo1376    | 2A | 97.2 |
| Xgwm122     | 2A | 97.2 |
| M85/P65.4   | 2A | 98.2 |
| Xcdo1281    | 2A | 98.2 |
| Xgpw1148    | 2A | 98.2 |
| Xpsr107     | 2A | 98.2 |
| Xpsr135     | 2A | 98.2 |
| Xgwm10a     | 2A | 98.2 |
| Xbcd855     | 2A | 98.6 |
| Xgwm249     | 2A | 98.7 |
| Xbarc309    | 2A | 99.7 |

|              |    |       |
|--------------|----|-------|
| Xcdo447      | 2A | 99.7  |
| Xfba70       | 2A | 99.7  |
| Xfba82       | 2A | 99.7  |
| Xfbb212      | 2A | 99.7  |
| Xrz395b      | 2A | 99.7  |
| Xbcd1709     | 2A | 100.2 |
| Xgwm71b      | 2A | 100.3 |
| Xcdo456      | 2A | 100.7 |
| Xfba71       | 2A | 100.7 |
| Xfbb353a     | 2A | 100.7 |
| Xgbx4986     | 2A | 100.7 |
| Xcfa2164     | 2A | 100.7 |
| Xgpw2272     | 2A | 101.7 |
| Xgsy333      | 2A | 101.7 |
| Xpsp3088     | 2A | 101.7 |
| Xwmc246      | 2A | 101.7 |
| Xgwm558      | 2A | 101.7 |
| XksuF37a     | 2A | 101.9 |
| Xmgb225      | 2A | 101.9 |
| Xmgb5        | 2A | 101.9 |
| Xpsr388      | 2A | 101.9 |
| Xwmc63       | 2A | 101.9 |
| Xutv1340     | 2A | 102   |
| XS25M51(350) | 2A | 102.1 |
| wPt-6461     | 2A | 102.1 |
| Xwmc51       | 2A | 102.2 |
| Xwmc702      | 2A | 102.2 |
| wPt-8621     | 2A | 102.3 |
| wPt-1203     | 2A | 102.5 |
| wPt-1217     | 2A | 102.5 |
| wPt-8243     | 2A | 102.5 |
| wPt-8826     | 2A | 102.5 |
| Xwmc644      | 2A | 102.6 |
| Xgdm101      | 2A | 103   |
| Xgwm1045     | 2A | 103   |
| Xgwm895      | 2A | 103   |
| Xmag1010     | 2A | 103   |
| Xwmc744      | 2A | 103   |
| wPt-3114     | 2A | 103   |
| Xgwm630      | 2A | 103.1 |
| Xgwm473      | 2A | 103.4 |
| Xwmc794      | 2A | 103.9 |
| Xwmc632      | 2A | 104.6 |
| Xgwm66       | 2A | 104.9 |
| M62/P64.3    | 2A | 105   |



|             |    |       |
|-------------|----|-------|
| P78/M63.2   | 2A | 105   |
| XWC2263b    | 2A | 105   |
| Xbcd348     | 2A | 105   |
| Xpsr575.1   | 2A | 105   |
| Xwmc179     | 2A | 105   |
| Xgwm304     | 2A | 105   |
| Xfbb278     | 2A | 106   |
| Xgwm328     | 2A | 106   |
| Xwmc455     | 2A | 107   |
| wPt-7049    | 2A | 107.1 |
| Xgwm372     | 2A | 107.5 |
| Xglk554     | 2A | 108.5 |
| TC81096     | 2A | 111.7 |
| Xbarc15     | 2A | 111.9 |
| wPt-0921    | 2A | 111.9 |
| Xbcd543     | 2A | 112.1 |
| Xcfa2099    | 2A | 112.1 |
| Xcfa2043    | 2A | 114.1 |
| Xcmwg682    | 2A | 114.1 |
| Xwsu1       | 2A | 114.1 |
| P78/M69.9   | 2A | 115.1 |
| P32/M48-213 | 2A | 117.1 |
| Xfba276     | 2A | 117.1 |
| Xfbb353b    | 2A | 117.1 |
| Xbarc353    | 2A | 117.1 |
| Xwmc819     | 2A | 117.3 |
| M60/P64.6   | 2A | 118.3 |
| Xwmc261     | 2A | 118.3 |
| Xcfa2263    | 2A | 118.6 |
| Xbarc5      | 2A | 118.9 |
| Xcfa2058    | 2A | 119.6 |
| Xfbb353c    | 2A | 119.6 |
| Xgpw2206    | 2A | 119.6 |
| Xcfd6       | 2A | 120.4 |
| wPt-8071    | 2A | 120.4 |
| XksuG5b     | 2A | 120.6 |
| Xgwm47      | 2A | 121.6 |
| Xgwm445     | 2A | 123.2 |
| Xgwm817     | 2A | 123.8 |
| wPt-5865    | 2A | 124.2 |
| PmHNK54     | 2A | 125.7 |
| Xwmc109     | 2A | 126.6 |
| wPt-3244    | 2A | 129.1 |
| wPt-7056    | 2A | 129.5 |
| Xfba61      | 2A | 130   |

|            |    |       |
|------------|----|-------|
| Xfba62     | 2A | 130   |
| Xfba64     | 2A | 130   |
| Xfbb284    | 2A | 130   |
| XgbxG214   | 2A | 130   |
| Xwmc170    | 2A | 130   |
| Xgwm312    | 2A | 130   |
| wPt-2087   | 2A | 131.5 |
| PPO18      | 2A | 132.2 |
| Ppo-A1     | 2A | 132.2 |
| Xgwm372c   | 2A | 132.2 |
| Xgwm294    | 2A | 132.2 |
| Xcfd168    | 2A | 141.1 |
| Xcfd86     | 2A | 147   |
| Xfba345    | 2A | 149.3 |
| Xcfa2121   | 2A | 150.3 |
| Xgwm47c    | 2A | 151.3 |
| Xbcd1095   | 2A | 152.3 |
| Xbcd1307   | 2A | 152.3 |
| Xbcd1970   | 2A | 152.3 |
| XksuE16    | 2A | 152.3 |
| Xwmc35     | 2A | 153.3 |
| P33/M76-3  | 2A | 154.3 |
| Xpsr934    | 2A | 154.3 |
| Xgpw2229   | 2A | 155.3 |
| Xgpw2281   | 2A | 155.3 |
| XksuD22    | 2A | 155.3 |
| Xwmc181a   | 2A | 155.3 |
| Xbcd1086   | 2A | 156.3 |
| Xbcd292a   | 2A | 157.3 |
| Xcdo1410   | 2A | 161.3 |
| Xglk594    | 2A | 161.3 |
| P36/M41-2  | 2A | 162.3 |
| Xbarc353.1 | 2A | 162.3 |
| Xgpw2046   | 2A | 163.3 |
| Xfba314a   | 2A | 164.3 |
| Xgwm356    | 2A | 164.3 |
| Xfba385a   | 2A | 166.3 |
| XksuF11    | 2A | 166.3 |
| XksuD23    | 2A | 167.3 |
| XksuG5     | 2A | 167.3 |
| Xgwm265    | 2A | 168.3 |
| Xgwm526    | 2A | 168.3 |
| Pm4a       | 2A | 169.3 |
| P78/M87.6  | 2A | 171.3 |
| XksuF41    | 2A | 171.3 |

|            |    |       |
|------------|----|-------|
| Xwg645     | 2A | 171.3 |
| P78/M43.8  | 2A | 173.3 |
| P78/M71.7  | 2A | 173.3 |
| XWC0050pb  | 2A | 173.3 |
| Xbcd18     | 2A | 173.3 |
| Xcdo678    | 2A | 173.3 |
| M77/P64.7  | 2A | 175.3 |
| XksuF1     | 2A | 176.3 |
| Xbcd292    | 2A | 177.3 |
| Xgwm761    | 2A | 177.9 |
| Pm23(Pm4c) | 2A | 178   |
| Xgwm526a   | 2A | 178   |
| Xcfd168a   | 2A | 178.4 |
| Xwmc198    | 2A | 178.8 |
| wPt-7024a  | 2A | 178.8 |
| Xbarc279   | 2A | 178.8 |
| Xcfd86a    | 2A | 178.9 |
| Xbcd1428   | 2A | 179.7 |
| Xbcd410    | 2A | 179.7 |
| XksuH16    | 2A | 179.7 |
| Xwmc181    | 2A | 181.7 |
| tPt-3136   | 2A | 182.2 |
| wPt-6064   | 2A | 183   |
| Xgwm1067   | 2A | 183.2 |
| Pm4d       | 2A | 184.3 |
| Xbarc76    | 2A | 184.6 |
| wPt-0638   | 2A | 185.3 |
| wPt-3728a  | 2A | 185.3 |
| Xwmc658    | 2A | 185.4 |
| Xgwm382    | 2A | 185.7 |
| wPt-7466   | 2A | 185.7 |
| Xgwm311    | 2A | 187.3 |
| Pm4b       | 2A | 188   |
| XgbxG303   | 2A | 188.4 |
| Xfba209    | 2A | 189.3 |
| Xfba385    | 2A | 189.3 |
| Xgpw4456   | 2A | 189.4 |
| XteLL      | 2A | 190.3 |
| Xcfd267    | 2A | 191.7 |
| XksuF11b   | 2A | 192.3 |
| Xfba8      | 2A | 193.3 |
| Xmag3579   | 2A | 195.4 |
| Xfba314    | 2A | 199.3 |
| Xpsr540    | 2A | 201.9 |
| Xcfa2086   | 2A | 204.3 |

|           |    |      |
|-----------|----|------|
| wPt-4026  | 2B | 0    |
| Lr16      | 2B | 0.3  |
| wPt-0746  | 2B | 2.8  |
| wPt-1663  | 2B | 3.2  |
| wPt-8970  | 2B | 3.2  |
| wPt-3388  | 2B | 3.4  |
| wPt-6158  | 2B | 3.8  |
| wPt-3565  | 2B | 4    |
| wPt-0477  | 2B | 4.1  |
| wPt-6223  | 2B | 4.7  |
| wPt-1813  | 2B | 4.8  |
| W01T03a   | 2B | 5.2  |
| Xbcd348   | 2B | 5.4  |
| Xglk302.1 | 2B | 5.4  |
| Xgwm5b    | 2B | 6.5  |
| wPt-9274  | 2B | 7.1  |
| wPt-1634  | 2B | 7.6  |
| Xwmc764   | 2B | 8.3  |
| wPt-1842  | 2B | 9.8  |
| BQ170801  | 2B | 10   |
| Xbarc45   | 2B | 17.1 |
| Xbarc35   | 2B | 17.2 |
| wPt-7970  | 2B | 19   |
| wPt-5960  | 2B | 19.3 |
| Xwmc661   | 2B | 19.4 |
| wPt-6805  | 2B | 19.7 |
| Xgwm210   | 2B | 20.5 |
| wPt-0100  | 2B | 20.5 |
| wPt-4916  | 2B | 20.5 |
| wPt-3517  | 2B | 20.8 |
| Xwmc489   | 2B | 21.1 |
| wPt-3459  | 2B | 21.9 |
| wPt-8737  | 2B | 22   |
| Xwmc382   | 2B | 22.8 |
| wPt-4453  | 2B | 23.4 |
| wPt-8235  | 2B | 24.2 |
| wPt-1601b | 2B | 25.6 |
| wPt-2106  | 2B | 25.6 |
| wPt-5738  | 2B | 25.9 |
| XksuD18   | 2B | 27.2 |
| Xcdo456   | 2B | 30.2 |
| Xcmwg682  | 2B | 30.2 |
| Xfba82    | 2B | 30.2 |
| Xmwg682   | 2B | 30.2 |
| Xgwm614   | 2B | 30.2 |

|             |    |      |
|-------------|----|------|
| Sm1         | 2B | 32.2 |
| wPt-7995    | 2B | 32.6 |
| Xfbb171     | 2B | 33   |
| Xgdm93a     | 2B | 33   |
| wPt-10908   | 2B | 33.1 |
| XWB124pbc   | 2B | 33.9 |
| BJ227727    | 2B | 34.6 |
| Xmwg676     | 2B | 34.7 |
| wPt-5188    | 2B | 35.6 |
| wPt-6311    | 2B | 35.6 |
| Xbarc124    | 2B | 35.9 |
| wPt-6706    | 2B | 36   |
| Xfba70      | 2B | 36.6 |
| Xopx9-970   | 2B | 36.6 |
| P78/M59.1   | 2B | 37.6 |
| Xcdo447     | 2B | 37.6 |
| Xfba83      | 2B | 37.6 |
| P78/M68.2   | 2B | 38.6 |
| P78/M68.3b  | 2B | 38.6 |
| P78/M72.8   | 2B | 38.6 |
| Xgpw2039    | 2B | 38.6 |
| wPt-9958    | 2B | 38.9 |
| wPt-5567    | 2B | 40.1 |
| Xcfd238     | 2B | 42.7 |
| CA695634    | 2B | 44   |
| MIIW170     | 2B | 45.8 |
| Xopab2-1410 | 2B | 45.9 |
| wPt-1041    | 2B | 47.1 |
| XE1M1g      | 2B | 47.7 |
| Xfbb274.1   | 2B | 47.7 |
| Xfba308     | 2B | 50.7 |
| Xwmc83      | 2B | 53.7 |
| M86/P65.1   | 2B | 55.7 |
| Xbarc318    | 2B | 56.7 |
| Xwmc25      | 2B | 58.7 |
| wPt-8326    | 2B | 60.6 |
| wPt-8389    | 2B | 60.9 |
| wPt-8004    | 2B | 61   |
| Xgwm154     | 2B | 62   |
| wPt-10778   | 2B | 62.4 |
| Xfba280     | 2B | 62.4 |
| Xwmc154     | 2B | 62.4 |
| wPt-3569a   | 2B | 63.9 |
| Xwmc243     | 2B | 64.4 |
| Xgpw1099    | 2B | 64.9 |

|             |    |      |
|-------------|----|------|
| Xgwm1128    | 2B | 68.1 |
| Xwmc597     | 2B | 68.3 |
| Xwmc213     | 2B | 69.6 |
| tPt-4627    | 2B | 70.6 |
| wPt-5374b   | 2B | 71.4 |
| Xbarc200    | 2B | 71.9 |
| Xbcd18      | 2B | 73.9 |
| Xcfd11b     | 2B | 74.9 |
| Xrz69       | 2B | 74.9 |
| P78/M71.1   | 2B | 75.9 |
| Xgbx3793    | 2B | 76.9 |
| XWB007i     | 2B | 77.9 |
| Xfbb121     | 2B | 77.9 |
| Xfba4.1     | 2B | 78.9 |
| Xfbb40.2    | 2B | 78.9 |
| Xpsr593     | 2B | 78.9 |
| XgbxG035    | 2B | 79.9 |
| Xgwm257     | 2B | 79.9 |
| wPt-6246    | 2B | 80.3 |
| Xmag3976    | 2B | 81.1 |
| P78/M87.5   | 2B | 81.5 |
| Xbcd1434    | 2B | 81.5 |
| Xpsr126     | 2B | 81.5 |
| Xwmc257     | 2B | 82   |
| wPt-7695    | 2B | 82.1 |
| wPt-4301    | 2B | 83.4 |
| wPt-5707b   | 2B | 84.7 |
| wPt-3983b   | 2B | 84.8 |
| wPt-4997    | 2B | 85   |
| wPt-1489    | 2B | 85.1 |
| wPt-3561    | 2B | 85.1 |
| wPt-8072b   | 2B | 85.1 |
| wPt-9402b   | 2B | 85.1 |
| wPt-9423b   | 2B | 85.1 |
| QYld.crc-2B | 2B | 85.4 |
| Xrz444.1    | 2B | 85.4 |
| Xwmc420     | 2B | 85.4 |
| Xgwm71      | 2B | 85.4 |
| Xbcd1184    | 2B | 86.4 |
| Xpsr146     | 2B | 86.4 |
| wPt-9668    | 2B | 87.7 |
| wPt-6932    | 2B | 87.9 |
| Xfba29a     | 2B | 88.3 |
| Xgpw1148    | 2B | 88.3 |
| Xgwm55a     | 2B | 88.3 |

|           |    |       |
|-----------|----|-------|
| Xfba272.2 | 2B | 89.3  |
| Xfba29b   | 2B | 91.3  |
| Xfbb62    | 2B | 91.3  |
| Xwmc422   | 2B | 91.3  |
| Xcdo665   | 2B | 92.3  |
| Xgpw1030  | 2B | 92.3  |
| XgbxG142  | 2B | 93.3  |
| Xbcd445a  | 2B | 94.3  |
| Xcni6a    | 2B | 94.3  |
| XgbxGx71  | 2B | 94.3  |
| XgbxR452  | 2B | 94.3  |
| Xgwm257b  | 2B | 94.3  |
| Xgwm388a  | 2B | 94.3  |
| Xgwm429   | 2B | 96.3  |
| Xwmc770   | 2B | 98.5  |
| Xbarc10   | 2B | 98.6  |
| Xgwm682   | 2B | 102.3 |
| wPt-4195  | 2B | 102.7 |
| wPt-5788  | 2B | 102.9 |
| wPt-5513  | 2B | 103   |
| Pm42      | 2B | 103.1 |
| wPt-5672  | 2B | 103.9 |
| Xmag464   | 2B | 106.2 |
| wPt-9644  | 2B | 106.2 |
| wPt-2600  | 2B | 106.4 |
| wPt-7320  | 2B | 106.9 |
| wPt-8513  | 2B | 107   |
| wPt-5556  | 2B | 107.1 |
| wPt-0408  | 2B | 107.6 |
| wPt-7158  | 2B | 107.6 |
| Xgwm148   | 2B | 107.7 |
| wPt-6567  | 2B | 107.7 |
| wPt-4125  | 2B | 108.3 |
| TC82742   | 2B | 108.8 |
| wPt-1064  | 2B | 108.8 |
| wPt-6192  | 2B | 108.8 |
| wPt-6199  | 2B | 108.8 |
| wPt-9098  | 2B | 108.8 |
| wPt-0615  | 2B | 109   |
| wPt-7757  | 2B | 109   |
| XgbxR739  | 2B | 109.1 |
| YrCN19    | 2B | 109.1 |
| Xgwm410   | 2B | 109.1 |
| Xwmc597b  | 2B | 109.2 |
| wPt-2120b | 2B | 109.9 |

|               |    |       |
|---------------|----|-------|
| wPt-6477      | 2B | 111   |
| Xfbb353       | 2B | 111.5 |
| Xmwg950       | 2B | 111.5 |
| Xgwm132       | 2B | 111.7 |
| Xgwm128       | 2B | 111.9 |
| Xfba374       | 2B | 112.2 |
| Xtam72.3      | 2B | 112.2 |
| Xwsu1         | 2B | 112.2 |
| Xwmc35        | 2B | 112.2 |
| wPt-3288      | 2B | 112.4 |
| Xpsr596b      | 2B | 112.6 |
| Xwmc434       | 2B | 112.6 |
| wPt-2314      | 2B | 112.9 |
| QEet.inra-2B  | 2B | 113   |
| QYr.sgi-2B.1  | 2B | 113   |
| XgbxG520      | 2B | 113   |
| Xgpw1109      | 2B | 113   |
| Xbarc13       | 2B | 113   |
| Xbarc7        | 2B | 113.5 |
| wPt-7779      | 2B | 113.9 |
| Xbarc183      | 2B | 114.1 |
| Xcdo405       | 2B | 114.4 |
| Xfba106       | 2B | 114.4 |
| Xgpw1073      | 2B | 114.4 |
| Xgpw2225      | 2B | 114.4 |
| Xgpw320       | 2B | 114.4 |
| Yr27          | 2B | 114.4 |
| wPt-6471      | 2B | 115   |
| Xcfa2043      | 2B | 115.4 |
| Xwsu1.1(Dor6) | 2B | 115.4 |
| wPt-0335      | 2B | 115.8 |
| TC71236       | 2B | 115.9 |
| Xbarc55       | 2B | 116.4 |
| Xwmc261       | 2B | 117   |
| Xfbb47        | 2B | 117.4 |
| Xwmc272       | 2B | 117.6 |
| Ne2           | 2B | 118.4 |
| Xbarc361      | 2B | 118.4 |
| Xbcd152       | 2B | 118.4 |
| Xgwm630       | 2B | 119.4 |
| Xfba38        | 2B | 120.6 |
| Xbarc98       | 2B | 120.7 |
| Xwmc474       | 2B | 120.9 |
| Xbcd265       | 2B | 121   |
| Xbarc1147     | 2B | 121.2 |



|              |    |       |
|--------------|----|-------|
| Xfbb185      | 2B | 121.3 |
| Xbarc160     | 2B | 121.6 |
| Xbarc91      | 2B | 121.6 |
| Xbcd1709     | 2B | 121.6 |
| XksuF11a     | 2B | 121.6 |
| Xbarc18      | 2B | 121.6 |
| Xcni2        | 2B | 122.6 |
| Xfbb21       | 2B | 122.6 |
| Xfbb226a     | 2B | 122.6 |
| Xfbb75a      | 2B | 122.6 |
| Xtam18       | 2B | 122.6 |
| Xwmc179      | 2B | 122.6 |
| Xwmc344      | 2B | 123   |
| Xbarc167     | 2B | 123.2 |
| Xwmc27       | 2B | 123.2 |
| QLr.osu-2B   | 2B | 124.2 |
| Xfba64       | 2B | 124.2 |
| XksuD22      | 2B | 124.2 |
| Xgwm374      | 2B | 124.2 |
| Xwmc265      | 2B | 125.3 |
| Xbcd1119     | 2B | 125.6 |
| Xcdo388      | 2B | 125.6 |
| Xgwm319      | 2B | 125.6 |
| Qfhs.inra-2B | 2B | 126.6 |
| Xfba199      | 2B | 127.6 |
| Xfbb335      | 2B | 127.6 |
| Xfbb4        | 2B | 127.6 |
| Xcfa2278     | 2B | 127.8 |
| Xbarc349     | 2B | 128.5 |
| Xgwm403      | 2B | 128.5 |
| Xbcd445b     | 2B | 128.8 |
| Xcni6b       | 2B | 128.8 |
| XksuF37      | 2B | 128.8 |
| Xwmc477      | 2B | 128.8 |
| Sr36         | 2B | 129.8 |
| Xbcd260      | 2B | 129.8 |
| Xcdo370      | 2B | 129.8 |
| XgbxG553     | 2B | 129.8 |
| Xwmc245      | 2B | 130.8 |
| Xwmc592      | 2B | 131.1 |
| Xwmc498      | 2B | 131.3 |
| wPt-6278     | 2B | 131.4 |
| Xgwm271      | 2B | 131.5 |
| Xgwm55       | 2B | 132.8 |
| Xgwm55b      | 2B | 133.7 |

|              |    |       |
|--------------|----|-------|
| Xbarc128     | 2B | 134.2 |
| wPt-0473     | 2B | 134.7 |
| Xgwm129      | 2B | 135.4 |
| Xbarc1139    | 2B | 135.8 |
| XWG996       | 2B | 137.3 |
| Xgwm388      | 2B | 137.3 |
| Xgwm337      | 2B | 137.4 |
| CA594434a    | 2B | 138   |
| Xglk594      | 2B | 138.5 |
| QGw1.inra-2B | 2B | 139.5 |
| Xopp2-510    | 2B | 139.5 |
| BM134420-239 | 2B | 139.5 |
| wPt-0950     | 2B | 139.7 |
| Xfbb284a     | 2B | 140.5 |
| wPt-3132     | 2B | 140.6 |
| wPt-2854     | 2B | 140.7 |
| wPt-7404     | 2B | 140.7 |
| wPt-7200     | 2B | 140.8 |
| Xfba345      | 2B | 141.5 |
| Xfba61       | 2B | 141.5 |
| Xfba62       | 2B | 141.5 |
| XgbxG329     | 2B | 141.5 |
| Xfbb324      | 2B | 142.5 |
| Yr5          | 2B | 142.5 |
| wPt-0694     | 2B | 142.8 |
| Xbarc101     | 2B | 143.5 |
| Xbcd1779     | 2B | 143.5 |
| XksuF15      | 2B | 143.5 |
| Xwsu2(Pk)    | 2B | 143.5 |
| wPt-9736     | 2B | 144.3 |
| CA724675     | 2B | 144.9 |
| Xcdo669      | 2B | 145.1 |
| Xwmc363      | 2B | 145.6 |
| Xwmc441      | 2B | 145.6 |
| Xcfd70c      | 2B | 145.8 |
| wPt-4968     | 2B | 145.8 |
| Xwmc149a     | 2B | 146.4 |
| Xcfd70       | 2B | 146.7 |
| Xwmc500      | 2B | 147.2 |
| wPt-1140     | 2B | 147.2 |
| wPt-5878     | 2B | 147.7 |
| Xwmc51       | 2B | 148.4 |
| wPt-4002     | 2B | 148.4 |
| wPt-4199     | 2B | 148.6 |
| wPt-5128     | 2B | 148.6 |

|            |    |       |
|------------|----|-------|
| Xcdo684    | 2B | 148.9 |
| Xgwm120    | 2B | 148.9 |
| Xgwm1027   | 2B | 149   |
| wPt-7892   | 2B | 149.2 |
| wPt-8040a  | 2B | 149.7 |
| Xgwm191    | 2B | 149.7 |
| Xmxe3M2b   | 2B | 150.7 |
| Xwmc51h    | 2B | 150.7 |
| BU099658   | 2B | 150.8 |
| wPt-3701   | 2B | 150.8 |
| wPt-4812   | 2B | 151.5 |
| Xgwm877    | 2B | 151.8 |
| tPt-6105   | 2B | 151.9 |
| wPt-7765   | 2B | 151.9 |
| wPt-7859   | 2B | 151.9 |
| wPt-7161   | 2B | 152   |
| wPt-8856   | 2B | 152.2 |
| wPt-5736   | 2B | 152.3 |
| wPt-7350   | 2B | 152.4 |
| wPt-8284   | 2B | 152.4 |
| wPt-9336   | 2B | 152.4 |
| wPt-6565   | 2B | 152.5 |
| Xfbb113a   | 2B | 152.8 |
| wPt-10715  | 2B | 153   |
| wPt-2397   | 2B | 153   |
| Xbcd292    | 2B | 153.2 |
| wPt-1650   | 2B | 153.4 |
| Xfba209    | 2B | 153.8 |
| Yr7        | 2B | 153.8 |
| Xwmc360    | 2B | 153.8 |
| wPt-3042   | 2B | 153.8 |
| wPt-305355 | 2B | 153.9 |
| wPt-6522   | 2B | 154.4 |
| wPt-8569   | 2B | 154.5 |
| Xcfd73     | 2B | 154.7 |
| wPt-3436   | 2B | 154.7 |
| wPt-305036 | 2B | 154.9 |
| wPt-7317   | 2B | 155.1 |
| wPt-0906   | 2B | 155.8 |
| wPt-0794   | 2B | 156.2 |
| wPt-0891   | 2B | 156.6 |
| Xmwg2025   | 2B | 156.7 |
| wPt-2274   | 2B | 157.1 |
| rPt-6122   | 2B | 157.3 |
| Xbcd512    | 2B | 157.4 |

|           |    |       |
|-----------|----|-------|
| wPt-11421 | 2B | 157.4 |
| Xbcd307   | 2B | 157.6 |
| Xgwm16    | 2B | 157.6 |
| wPt-3632  | 2B | 157.6 |
| wPt-6643  | 2B | 157.6 |
| Xgwm47    | 2B | 157.8 |
| wPt-2724  | 2B | 158.2 |
| wPt-10548 | 2B | 158.8 |
| Xgwm130   | 2B | 159.1 |
| wPt-2293  | 2B | 159.2 |
| wPt-8693  | 2B | 159.4 |
| wPt-8340  | 2B | 160   |
| Xwmc435   | 2B | 160.4 |
| wPt-0189  | 2B | 160.5 |
| wPt-9654  | 2B | 160.6 |
| wPt-1294  | 2B | 160.7 |
| CA662535  | 2B | 160.8 |
| Xbcd410   | 2B | 161   |
| Xpsr370b  | 2B | 161.2 |
| Xfba359a  | 2B | 162.1 |
| Xgwm501   | 2B | 162.1 |
| wPt-8521  | 2B | 163.2 |
| wPt-2135  | 2B | 163.3 |
| wPt-10440 | 2B | 163.5 |
| wPt-3378  | 2B | 163.5 |
| wPt-5779  | 2B | 163.5 |
| wPt-7360  | 2B | 163.5 |
| wPt-5680  | 2B | 163.6 |
| wPt-3929  | 2B | 163.7 |
| wPt-0489  | 2B | 163.8 |
| TC72953   | 2B | 164   |
| wPt-3651  | 2B | 164   |
| wPt-0049  | 2B | 165.8 |
| wPt-4368  | 2B | 165.9 |
| wPt-4917  | 2B | 165.9 |
| Xwmc175   | 2B | 166.1 |
| wPt-2266  | 2B | 166.6 |
| wPt-1646  | 2B | 166.8 |
| wPt-7305  | 2B | 166.8 |
| Xwmc175a  | 2B | 166.9 |
| wPt-5242  | 2B | 168.6 |
| Xgwm1300  | 2B | 168.7 |
| BJ253815  | 2B | 169.3 |
| Sr9a      | 2B | 170.2 |
| Xcdo678a  | 2B | 170.2 |

|           |    |       |
|-----------|----|-------|
| Xfba117   | 2B | 170.2 |
| Xfba276   | 2B | 170.2 |
| CA681959b | 2B | 171.6 |
| Xmwg660a  | 2B | 174.3 |
| XpKabaG   | 2B | 174.3 |
| Xwmc332   | 2B | 174.3 |
| Xbcd1095A | 2B | 175.3 |
| Xbcd135   | 2B | 175.3 |
| Xfba385a  | 2B | 175.3 |
| Xfba102   | 2B | 176.3 |
| Xfba116   | 2B | 176.3 |
| XgbxG087  | 2B | 176.3 |
| XksuF1    | 2B | 176.3 |
| XksuF41   | 2B | 176.3 |
| Xmwg546   | 2B | 176.3 |
| Xcfd267   | 2B | 177.3 |
| Xwmc434a  | 2B | 177.3 |
| Xglk558   | 2B | 180.3 |
| XksuD23   | 2B | 181.3 |
| Xfba314   | 2B | 182.3 |
| Xcdo36    | 2B | 183.3 |
| Xfba310   | 2B | 183.3 |
| Xfbb284b  | 2B | 183.3 |
| Xcdo244   | 2B | 184.2 |
| Xfbb226b  | 2B | 184.2 |
| Xfbb75b   | 2B | 185.2 |
| XksuF11b  | 2B | 185.2 |
| Xwg645    | 2B | 185.2 |
| Xwmc627   | 2B | 185.3 |
| wPt-9257  | 2B | 185.3 |
| wPt-4223  | 2B | 185.7 |
| wPt-0510  | 2B | 186.6 |
| wPt-0567  | 2B | 187.5 |
| Xbcd1231  | 2B | 188.5 |
| Xfbb278   | 2B | 188.5 |
| Xgwm619   | 2B | 190.5 |
| Xgdm93b   | 2B | 191.5 |
| Xksu558   | 2B | 192.5 |
| Lr50      | 2B | 193.5 |
| wPt-8776  | 2B | 193.8 |
| Xcdo678b  | 2B | 194.3 |
| Xfba359b  | 2B | 195.3 |
| Pm33      | 2B | 196.3 |
| Xfba385b  | 2B | 196.3 |
| Xwmc149   | 2B | 196.3 |

|               |    |       |
|---------------|----|-------|
| TC89976       | 2B | 196.5 |
| Xwmc361       | 2B | 197.6 |
| wPt-7506      | 2B | 199.1 |
| wPt-2622      | 2B | 201.1 |
| PmJM22        | 2B | 201.6 |
| Rht4          | 2B | 204.1 |
| Xwmc317       | 2B | 204.1 |
| Xwmc817       | 2B | 204.8 |
| wPt-6894      | 2B | 204.9 |
| wPt-0471      | 2B | 205.3 |
| Xcmwg660      | 2B | 205.7 |
| Xmwg660b      | 2B | 205.7 |
| PmPS5B        | 2B | 205.9 |
| MIAB10        | 2B | 206.1 |
| Xbarc159      | 2B | 208.7 |
| Xwg338        | 2B | 209.1 |
| Xfbb113       | 2B | 209.4 |
| Xwmc445       | 2B | 209.4 |
| Xgwm382       | 2B | 215.7 |
| MIZec1        | 2B | 218.3 |
| Xwmc356       | 2B | 218.9 |
| Xgwm526       | 2B | 222.4 |
| Xwmc602       | 2B | 225.9 |
| Pm6           | 2B | 263.3 |
| XW21a         | 2D | 0     |
| XWB124pba     | 2D | 0     |
| Xcfd77        | 2D | 5     |
| Xbarc124      | 2D | 8     |
| lw2           | 2D | 9     |
| D1.1_ctg10347 | 2D | 10    |
| D1.1_ctg13285 | 2D | 10    |
| D1.1_ctg1672  | 2D | 10    |
| D1.1_ctg4187  | 2D | 10    |
| D1.1_ctg5156  | 2D | 10    |
| D1.1_ctg5751  | 2D | 10    |
| D1.1_ctg5966  | 2D | 10    |
| D1.1_ctg7416  | 2D | 10    |
| D1.1_ctg8     | 2D | 10    |
| D1.1_ctg9710  | 2D | 10    |
| Xfbb274       | 2D | 10    |
| D1.1_ctg5649  | 2D | 11    |
| Xfba83a       | 2D | 11    |
| XgbxG218b     | 2D | 11    |
| Xgwm37        | 2D | 11    |
| XksuE3b       | 2D | 11    |

|              |    |      |
|--------------|----|------|
| Xwmc818      | 2D | 11.1 |
| Xwmc574      | 2D | 11.4 |
| Xcfa2040     | 2D | 12.1 |
| Xcmwg682a    | 2D | 12.1 |
| Xfba349a     | 2D | 12.1 |
| Xfbb189b     | 2D | 12.1 |
| XgbxG747a    | 2D | 12.1 |
| Xcfd56       | 2D | 13.7 |
| Xcfd65       | 2D | 13.7 |
| Xcfd51       | 2D | 16.4 |
| Xbarc90      | 2D | 17.3 |
| D1.1_ctg3038 | 2D | 18   |
| QEet.inra-2D | 2D | 18   |
| Xbcd18a      | 2D | 18   |
| Xcdo456a     | 2D | 18   |
| Xgpw294      | 2D | 18   |
| Xmwg682      | 2D | 18   |
| Xcfd36       | 2D | 18   |
| Xwmc111      | 2D | 18.3 |
| Xbcd1970     | 2D | 19.3 |
| wPt-6419     | 2D | 19.5 |
| Lr39         | 2D | 20.5 |
| Xfba272      | 2D | 20.5 |
| Xwmc25       | 2D | 23.8 |
| Xwmc503      | 2D | 25.8 |
| Xgwm261      | 2D | 28.5 |
| P39/M49-121  | 2D | 29.1 |
| Xgwm296      | 2D | 29.1 |
| Xgwm210      | 2D | 30.9 |
| Xcfd11       | 2D | 31.9 |
| Xcfd53       | 2D | 32.9 |
| Xwmc112      | 2D | 33.6 |
| Xabc165a     | 2D | 33.8 |
| XksuA1a      | 2D | 33.8 |
| wPt-2644     | 2D | 33.8 |
| P32/M37-6    | 2D | 33.8 |
| wPt-9997     | 2D | 33.9 |
| D1.1_ctg9144 | 2D | 34.8 |
| Xpsr908      | 2D | 34.8 |
| Xwmc431      | 2D | 34.8 |
| QFhs.pur.2D  | 2D | 35.8 |
| Xfba400      | 2D | 35.8 |
| Rht8         | 2D | 36.8 |
| Xgpw332      | 2D | 36.8 |
| Xcdo366      | 2D | 37.7 |

|               |    |      |
|---------------|----|------|
| QHd.ksu-2D    | 2D | 37.7 |
| P37/M39f      | 2D | 38.7 |
| Xfba349b      | 2D | 38.7 |
| Xfba88        | 2D | 38.7 |
| Xfba4         | 2D | 39.7 |
| Xgwm455       | 2D | 39.7 |
| Xbarc297      | 2D | 40.5 |
| wPt-8319      | 2D | 41.4 |
| Tg1           | 2D | 41.6 |
| wPt-3202      | 2D | 43.2 |
| wPt-6343      | 2D | 43.2 |
| Xcdo1379      | 2D | 44.6 |
| Xwmc470       | 2D | 44.6 |
| Xpsr370a      | 2D | 45.1 |
| Xbcd611       | 2D | 45.9 |
| Xwmc087       | 2D | 45.9 |
| wPt-0298      | 2D | 46.9 |
| wPt-2781      | 2D | 46.9 |
| wPt-6003      | 2D | 46.9 |
| wPt-7375      | 2D | 46.9 |
| Xgwm122       | 2D | 48.6 |
| Xgwm484       | 2D | 48.6 |
| D1.1_ctg161   | 2D | 49.6 |
| D1.1_ctg4862  | 2D | 49.6 |
| Xbcd102       | 2D | 49.6 |
| Xcfd255       | 2D | 49.6 |
| Xcdo1479      | 2D | 50.6 |
| Xwmc453       | 2D | 50.6 |
| wPt-9749      | 2D | 50.6 |
| Xcfd43        | 2D | 50.8 |
| wPt-0619      | 2D | 53.1 |
| Xwmc190       | 2D | 54   |
| wPt-4144      | 2D | 54   |
| Xbarc168      | 2D | 54.3 |
| Xgwm102       | 2D | 55.8 |
| D1.1_ctg7448  | 2D | 56.4 |
| Xbcd262       | 2D | 56.4 |
| Xfbb279       | 2D | 56.4 |
| wPt-1991      | 2D | 57   |
| Xbcd718       | 2D | 57.6 |
| Xwsu1         | 2D | 58.6 |
| Xwsu1.2(Dor6) | 2D | 58.6 |
| Xbcd1970b     | 2D | 59.6 |
| Xcfd2         | 2D | 59.6 |
| BE497718-260  | 2D | 60.6 |



|                |    |      |
|----------------|----|------|
| Xbcd18b        | 2D | 60.7 |
| Xcdo405        | 2D | 60.7 |
| Xcfa2262       | 2D | 60.7 |
| Xfba83         | 2D | 60.7 |
| wPt-8524       | 2D | 61.7 |
| Xgpw361        | 2D | 62.6 |
| Xgwm515        | 2D | 62.7 |
| Xcdo456b       | 2D | 63.4 |
| Xfba65         | 2D | 63.4 |
| XgbxG212       | 2D | 63.4 |
| Xgwm515b       | 2D | 63.4 |
| XgbxG536       | 2D | 64.4 |
| Xbarc292       | 2D | 65.4 |
| Xfba38         | 2D | 65.4 |
| XgbxR618       | 2D | 65.4 |
| Xgpw346        | 2D | 65.4 |
| P78/M72.4a     | 2D | 66.4 |
| Xgpw2088       | 2D | 66.4 |
| Xgpw349        | 2D | 66.4 |
| Xbcd260        | 2D | 68.4 |
| Xcmwg682       | 2D | 68.4 |
| Xgwm249        | 2D | 69.4 |
| Xw2lb          | 2D | 70.4 |
| XgbxR635       | 2D | 71.4 |
| D1.1_ctg216_1  | 2D | 73.4 |
| Xfba74a        | 2D | 73.4 |
| XgbxG145       | 2D | 73.4 |
| Xtam8a         | 2D | 73.4 |
| P35/M48-4      | 2D | 74.4 |
| Xbcd120        | 2D | 75.4 |
| XksuA1b        | 2D | 75.4 |
| Xwmc18         | 2D | 75.4 |
| Acph-D2        | 2D | 76.2 |
| D1.1_ctg6265-1 | 2D | 76.2 |
| Xbcd111        | 2D | 76.2 |
| Xfba341a       | 2D | 76.2 |
| Xwmc149        | 2D | 77.2 |
| Xbarc11        | 2D | 78.2 |
| Xgwm30         | 2D | 82.2 |
| Xcfd17         | 2D | 83.3 |
| Xgwm358        | 2D | 83.6 |
| Xbarc145       | 2D | 84.2 |
| Xcfd116        | 2D | 84.4 |
| Xwmc630        | 2D | 85   |
| Xwmc245        | 2D | 85.8 |

|                |    |       |
|----------------|----|-------|
| Xwmc144        | 2D | 85.9  |
| Xcfd160a       | 2D | 87.6  |
| Xcfd193        | 2D | 87.6  |
| Xcfd160        | 2D | 87.8  |
| Xwmc601        | 2D | 87.9  |
| Xfbb99         | 2D | 88.8  |
| Xwmc797        | 2D | 90    |
| wPt-1554       | 2D | 90    |
| Xgwm157        | 2D | 92    |
| Xgwm539        | 2D | 94.8  |
| Xcfd73         | 2D | 96.1  |
| Xcfd73b        | 2D | 97.3  |
| Xcfd233        | 2D | 98.3  |
| wPt-0330       | 2D | 98.9  |
| Xcfd62         | 2D | 99.3  |
| Xbarc228       | 2D | 100.2 |
| wPt-6574       | 2D | 101   |
| wPt-6752       | 2D | 101.3 |
| Xgwm296b       | 2D | 101.9 |
| Xwmc41         | 2D | 102.2 |
| Xwmc181        | 2D | 104.1 |
| Xcfd16         | 2D | 104.4 |
| Pm43           | 2D | 104.6 |
| wPt-3728b      | 2D | 105.3 |
| Xcfd168b       | 2D | 107.4 |
| Xcfd270        | 2D | 107.4 |
| D1.1_ctg5879   | 2D | 109.4 |
| Xfbb164b       | 2D | 109.4 |
| Xgpw1184       | 2D | 109.4 |
| Xgpw1247       | 2D | 109.4 |
| XgbxG575b      | 2D | 110.4 |
| D1.1_ctg216-2  | 2D | 111.4 |
| Xfba74b        | 2D | 111.4 |
| Xfba111a       | 2D | 112.4 |
| D1.1_ctg4236_1 | 2D | 113.4 |
| D1.1_ctg6265_2 | 2D | 113.4 |
| Xfba341b       | 2D | 113.4 |
| Xfba61a        | 2D | 113.4 |
| Xfba62a        | 2D | 113.4 |
| Xfba64a        | 2D | 113.4 |
| Xfbb122a       | 2D | 113.4 |
| Xfbb284a       | 2D | 113.4 |
| Xgwm790        | 2D | 113.4 |
| Xfbb32a        | 2D | 114.4 |
| Xtam8b         | 2D | 115.4 |

|                |    |       |
|----------------|----|-------|
| Xwmc035a       | 2D | 115.4 |
| Xgwm608        | 2D | 116.4 |
| Xpsr331.1      | 2D | 116.4 |
| Xfbb68a        | 2D | 117.4 |
| Xmwig526a      | 2D | 117.4 |
| Xrz444a        | 2D | 119.4 |
| D1.1_ctg6289_1 | 2D | 120.4 |
| Xfba209a       | 2D | 120.4 |
| Xfbb9a         | 2D | 120.4 |
| D1.1_ctg5940_1 | 2D | 121.4 |
| D1.1_ctg839_1  | 2D | 121.4 |
| Xfbb377a       | 2D | 121.4 |
| D1.1_ctg8097_1 | 2D | 122.4 |
| Xcfd44         | 2D | 122.4 |
| Xfba116a       | 2D | 122.4 |
| Xcfd168        | 2D | 122.6 |
| Xwmc243        | 2D | 124.2 |
| M86/P65.3      | 2D | 124.3 |
| Xcdo1008       | 2D | 124.3 |
| M51/P65.0      | 2D | 125.3 |
| Xgbx3832a      | 2D | 125.3 |
| Xgwm349        | 2D | 127.7 |
| Xksud23a       | 2D | 128.7 |
| Xcfd239        | 2D | 128.8 |
| D1.1_ctg3738_1 | 2D | 129.5 |
| Xfba311a       | 2D | 129.5 |
| Xfbb251a       | 2D | 129.5 |
| Xgwm877.2      | 2D | 129.5 |
| Xfbb72a        | 2D | 131.5 |
| Xksu558        | 2D | 131.5 |
| Xcfd161        | 2D | 132.5 |
| Xwmc445        | 2D | 132.5 |
| D1.1_ctg6265   | 2D | 134.5 |
| Xfba341c       | 2D | 134.5 |
| Xfba61b        | 2D | 134.5 |
| Xfbb284b       | 2D | 134.5 |
| D1.1_ctg4236_2 | 2D | 135.5 |
| D1.1_ctg8097_2 | 2D | 135.5 |
| Xfba111b       | 2D | 135.5 |
| Xfba62b        | 2D | 135.5 |
| Xfba64b        | 2D | 135.5 |
| Xfbb122b       | 2D | 135.5 |
| Xfbb32b        | 2D | 135.5 |
| Xgpw2321       | 2D | 135.5 |
| Xbarc219       | 2D | 137.5 |

|                |    |       |
|----------------|----|-------|
| Xgpw308        | 2D | 137.5 |
| wPt-4413       | 2D | 138.4 |
| Xgpw313a       | 2D | 138.4 |
| Xgpw300        | 2D | 139.4 |
| Xgpw338        | 2D | 139.4 |
| Xgwm301a       | 2D | 139.4 |
| Xrz444b        | 2D | 139.4 |
| Xgpw354        | 2D | 140.4 |
| XWC0050pa      | 2D | 141.4 |
| Xgwm311.1      | 2D | 141.4 |
| Xmwg526b       | 2D | 141.4 |
| Xwmc167        | 2D | 142.4 |
| Xwmc175        | 2D | 144.5 |
| Xgwm382        | 2D | 145.7 |
| D1.1_ctg3434   | 2D | 146.7 |
| D1.1_ctg5940_2 | 2D | 146.7 |
| D1.1_ctg839_2  | 2D | 146.7 |
| XBCD410        | 2D | 146.7 |
| Xfbb377b       | 2D | 146.7 |
| P35/M53-3      | 2D | 147.7 |
| P38/M49-7      | 2D | 147.7 |
| P40/M51-1      | 2D | 147.7 |
| P41/M48-61     | 2D | 147.7 |
| P41/M61-3      | 2D | 147.7 |
| Xgwm320        | 2D | 148.7 |
| D1.1_ctg2905   | 2D | 149.2 |
| D1.1_ctg7196   | 2D | 149.2 |
| XksuH9         | 2D | 149.2 |
| Xbarc59        | 2D | 149.2 |
| Xbarc159       | 2D | 149.9 |
| Xwmc817        | 2D | 151.9 |
| Xglk558        | 2D | 152.6 |
| Xfbb68b        | 2D | 154.6 |
| Xgwm349b       | 2D | 154.6 |
| XksuD23b       | 2D | 154.6 |
| Xgwm301        | 2D | 154.6 |
| Xcfd50         | 2D | 155.6 |
| Xfba314.2      | 2D | 156.6 |
| P31/M54-4      | 2D | 158.6 |
| XksuH16        | 2D | 158.6 |
| D1.1_ctg6289_2 | 2D | 161.6 |
| D1.1_ctg8097   | 2D | 161.6 |
| Xfba116b       | 2D | 161.6 |
| Xfbb9b         | 2D | 161.6 |
| P42/M60-6      | 2D | 162.6 |

|                |    |       |
|----------------|----|-------|
| Xfbb72b        | 2D | 162.6 |
| Xcdo18         | 2D | 163.6 |
| Xcdo36         | 2D | 163.6 |
| Xfba311b       | 2D | 168.6 |
| D1.1_ctg3738_2 | 2D | 169.6 |
| Xfbb251b       | 2D | 169.6 |
| Xabc165b       | 2D | 174.3 |
| Xfba209b       | 2D | 180.6 |
| Xbarc57        | 3A | 0     |
| wPt-7217       | 3A | 14.3  |
| P41/M61-1      | 3A | 17    |
| Xsun2.2        | 3A | 17    |
| P31/M57-2      | 3A | 18    |
| P41/M51-322    | 3A | 18    |
| Xgpw1106b      | 3A | 18    |
| Xksu683        | 3A | 18    |
| P36/M54-6      | 3A | 19    |
| P39/M49-377    | 3A | 19    |
| XgpwE11c       | 3A | 19    |
| Xpsr311a       | 3A | 20    |
| Xfbb370        | 3A | 21    |
| Xglk683        | 3A | 21    |
| Xbarc294       | 3A | 22    |
| Xbarc321       | 3A | 22    |
| Xbarc310       | 3A | 23    |
| Xwmc11         | 3A | 23    |
| wPt-1816       | 3A | 24.9  |
| wPt-2813       | 3A | 24.9  |
| wPt-8753       | 3A | 24.9  |
| Xabc172a       | 3A | 26.1  |
| Xbcd15         | 3A | 26.1  |
| QPhs.ocs-3A.1  | 3A | 27.7  |
| Xwmc532        | 3A | 28.6  |
| Xfbb293a       | 3A | 29.1  |
| Xfbb237a       | 3A | 31.1  |
| Xmwg11         | 3A | 31.1  |
| Xtam47.1       | 3A | 31.1  |
| Xcfd79         | 3A | 32.5  |
| Xbcd1773a      | 3A | 33.1  |
| Xmwg12a        | 3A | 33.1  |
| P37/M58-165    | 3A | 34.1  |
| Xtam61.2       | 3A | 34.1  |
| Xcdo395        | 3A | 36.1  |
| Xgwm369        | 3A | 36.1  |
| Xbcd1428       | 3A | 37.1  |

|             |    |      |
|-------------|----|------|
| Xcdo482     | 3A | 38.1 |
| Xtam63a     | 3A | 38.1 |
| P41/M41-4   | 3A | 39.1 |
| Xfba91      | 3A | 39.1 |
| wPt-9369    | 3A | 39.7 |
| Xbcd22      | 3A | 40.6 |
| wPt-7608    | 3A | 40.6 |
| Xgwm218     | 3A | 41.7 |
| Xbarc284    | 3A | 42.7 |
| Xfba366     | 3A | 42.7 |
| Xgpw2142b   | 3A | 42.7 |
| Xbcd1278    | 3A | 44.7 |
| Xcdo718A    | 3A | 44.7 |
| Xgpw2132    | 3A | 44.7 |
| P37/M58-3   | 3A | 45.7 |
| wPt-6854    | 3A | 50   |
| Xabc172b    | 3A | 51.8 |
| P35/M55-6   | 3A | 52.8 |
| P35/M50-1   | 3A | 53.8 |
| Xwmc050     | 3A | 53.8 |
| Xbarc179    | 3A | 54.8 |
| Xfbb237b    | 3A | 54.8 |
| Xmwg11b     | 3A | 54.8 |
| P36/M53-134 | 3A | 55.8 |
| Xmwg12      | 3A | 55.8 |
| Xmwg14      | 3A | 56.8 |
| Xfba091     | 3A | 57.8 |
| wPt-304671  | 3A | 58.9 |
| P42/M50-1   | 3A | 59.7 |
| XksuA6      | 3A | 59.7 |
| Xgpw2118b   | 3A | 60.7 |
| P32/M59-7   | 3A | 61.7 |
| Xcdo638     | 3A | 61.7 |
| XgbxG406    | 3A | 61.7 |
| tin3        | 3A | 61.7 |
| Br-A1       | 3A | 62.7 |
| Xgpw2016    | 3A | 62.7 |
| XksuA6.1    | 3A | 62.7 |
| wPt-6204    | 3A | 62.9 |
| wPt-9049    | 3A | 62.9 |
| P37/M53-3   | 3A | 63.4 |
| XWC2163ea   | 3A | 63.4 |
| Xpsr930     | 3A | 63.4 |
| Xpsr598     | 3A | 63.4 |
| Xcdo1345    | 3A | 64.4 |

|             |    |      |
|-------------|----|------|
| Xfbb293b    | 3A | 64.4 |
| wPt-1681    | 3A | 64.5 |
| wPt-4143    | 3A | 64.5 |
| wPt-7756    | 3A | 64.8 |
| P42/M49-2   | 3A | 65.4 |
| Xabg471.1   | 3A | 65.4 |
| Xbcd1823    | 3A | 65.4 |
| wPt-2698    | 3A | 65.8 |
| Xcdo1164    | 3A | 66.1 |
| Xpsr903a    | 3A | 66.1 |
| P41/M40-1   | 3A | 67.1 |
| Xbcd706     | 3A | 67.1 |
| Xmwig22.1   | 3A | 67.1 |
| Xbcd1532    | 3A | 68.1 |
| Xcdo1435    | 3A | 68.1 |
| Xabg460     | 3A | 69.1 |
| Xgpw297     | 3A | 69.1 |
| P40/M61-3   | 3A | 70.1 |
| Xpsr903b    | 3A | 70.1 |
| Xbarc356    | 3A | 70.1 |
| P39/M50-152 | 3A | 71.1 |
| XksuB8      | 3A | 71.1 |
| Xgpw2169    | 3A | 72.1 |
| Xgwm2       | 3A | 72.1 |
| BJ213673c   | 3A | 73.1 |
| Xbarc19     | 3A | 73.1 |
| Xbarc324    | 3A | 73.1 |
| Xgpw2266    | 3A | 73.1 |
| Xbarc45     | 3A | 73.1 |
| wPt-9562    | 3A | 73.3 |
| wPt-4352    | 3A | 73.6 |
| P44/M61-4   | 3A | 73.8 |
| Xcdo54      | 3A | 73.8 |
| Xfba127.1   | 3A | 73.8 |
| wPt-2755    | 3A | 74.8 |
| P37/M39-4   | 3A | 74.8 |
| Xbcd1145    | 3A | 74.8 |
| Xfba175     | 3A | 74.8 |
| Xbcd1127    | 3A | 75.8 |
| Xpsr311b    | 3A | 75.9 |
| wPt-7992    | 3A | 75.9 |
| Xgwm133     | 3A | 76.1 |
| wPt-1596    | 3A | 76.5 |
| wPt-2938    | 3A | 76.5 |
| S-A1        | 3A | 76.8 |

|           |    |      |
|-----------|----|------|
| Xcdo718B  | 3A | 76.8 |
| Xfbb332   | 3A | 76.8 |
| Xwmc379   | 3A | 76.8 |
| Xwmc50    | 3A | 77.3 |
| wPt-9154  | 3A | 77.9 |
| Xwmc505   | 3A | 78.1 |
| Xabg396   | 3A | 78.2 |
| Xbcd366   | 3A | 78.2 |
| Xbcd828   | 3A | 78.2 |
| wPt-1036  | 3A | 78.2 |
| Xgwm720   | 3A | 78.9 |
| wPt-2967  | 3A | 79.3 |
| wPt-5486  | 3A | 79.9 |
| Xgwm32    | 3A | 80.1 |
| Xwmc640   | 3A | 80.2 |
| W01T03c   | 3A | 80.3 |
| wPt-0714  | 3A | 80.3 |
| Xmag620b  | 3A | 80.6 |
| Xcfa2164b | 3A | 80.7 |
| Xgwm156   | 3A | 81.1 |
| Xwmc664   | 3A | 81.2 |
| Xgwm5     | 3A | 81.6 |
| Xgwm4     | 3A | 81.7 |
| Xgwm666a  | 3A | 82   |
| Xgwm674   | 3A | 82.6 |
| Xgwm30    | 3A | 83.1 |
| Xwmc651   | 3A | 83.2 |
| Xbarc67   | 3A | 84.2 |
| Xcdo1174  | 3A | 84.2 |
| Xmwg802   | 3A | 84.2 |
| Xwmc388a  | 3A | 84.4 |
| Xcfd193   | 3A | 85   |
| Xgwm403   | 3A | 86.2 |
| Xwmc627   | 3A | 86.2 |
| Xwmc489   | 3A | 86.2 |
| Xcfa2134  | 3A | 88   |
| wPt-5886  | 3A | 88.9 |
| Xcfa2234  | 3A | 89   |
| XATPase   | 3A | 89.4 |
| Xcdo118   | 3A | 89.4 |
| Xwmc527   | 3A | 89.5 |
| Xgwm1042  | 3A | 89.5 |
| Xwmc695   | 3A | 90.1 |
| Xwmc269   | 3A | 91.3 |
| Xwmc527b  | 3A | 91.3 |



|             |    |       |
|-------------|----|-------|
| Xwmc695a    | 3A | 91.3  |
| Xwmc269b    | 3A | 92.3  |
| Xwmc428     | 3A | 94.3  |
| Xdupw227    | 3A | 94.5  |
| TC74823a    | 3A | 95.1  |
| wPt-6891    | 3A | 96.4  |
| wPt-7890    | 3A | 96.4  |
| Xwmc264     | 3A | 99.3  |
| wPt-9215    | 3A | 101.7 |
| P35/M54-5   | 3A | 102.3 |
| P42/M49-3   | 3A | 102.3 |
| Xcfa2262    | 3A | 102.3 |
| wPt-5084    | 3A | 102.3 |
| wPt-4859    | 3A | 102.6 |
| wPt-4939    | 3A | 102.7 |
| wPt-11619   | 3A | 102.9 |
| wPt-2202    | 3A | 103   |
| wPt-6218    | 3A | 103.6 |
| wPt-5786    | 3A | 104.2 |
| Xgwm494     | 3A | 104.3 |
| Xbarc25     | 3A | 104.8 |
| XgbxG034    | 3A | 104.8 |
| Xgwm162     | 3A | 105.3 |
| F129        | 3A | 105.4 |
| QHt.riso-3A | 3A | 106   |
| Xfbb277.2   | 3A | 106   |
| Xwmc286     | 3A | 106   |
| wPt-6422    | 3A | 106.9 |
| Xcdo281     | 3A | 107.1 |
| XksuH2      | 3A | 107.1 |
| Xwg177      | 3A | 107.1 |
| tPt-7209a   | 3A | 107.7 |
| wPt-5943a   | 3A | 107.7 |
| Xgwm1038    | 3A | 107.9 |
| Xmwg30a     | 3A | 108.2 |
| Xpsr156     | 3A | 108.2 |
| Xfbb271     | 3A | 109.2 |
| Xwmc96      | 3A | 109.8 |
| Xgwm751     | 3A | 110   |
| Xbcd452     | 3A | 110.2 |
| Xgpw2109    | 3A | 110.2 |
| Xbarc69     | 3A | 110.8 |
| Xgwm497     | 3A | 110.9 |
| Xbcd115     | 3A | 111.3 |
| Xbcd2044    | 3A | 111.3 |

|            |    |       |
|------------|----|-------|
| Xcfa2193   | 3A | 111.7 |
| wPt-4077   | 3A | 112.2 |
| Xmwg961    | 3A | 112.4 |
| Xtam33     | 3A | 112.4 |
| wPt-4725   | 3A | 113.5 |
| Xopx-09.2  | 3A | 113.5 |
| M17/P77.12 | 3A | 115.5 |
| XWC2234c   | 3A | 115.5 |
| Xfbb353.1  | 3A | 115.5 |
| Xpsp3047   | 3A | 115.5 |
| XgbxG499   | 3A | 116.5 |
| wPt-9268   | 3A | 116.5 |
| Xbarc12    | 3A | 117.1 |
| Xwmc173    | 3A | 117.9 |
| Xbcd1145b  | 3A | 118.6 |
| Xtam63b    | 3A | 118.6 |
| Xcfd2      | 3A | 118.7 |
| Xwmc559    | 3A | 120   |
| tPt-1002   | 3A | 120.6 |
| Xgwm155    | 3A | 122   |
| Xwmc153    | 3A | 124.2 |
| wPt-3697   | 3A | 125.3 |
| Xwmc215    | 3A | 126.2 |
| wPt-4407   | 3A | 127.3 |
| Xbcd372    | 3A | 129.8 |
| Xcdo460    | 3A | 131   |
| Xfba167.1  | 3A | 132.7 |
| Xabc172c   | 3A | 133.7 |
| Xcfa2076   | 3A | 134.7 |
| Xwmc169    | 3A | 136.3 |
| Xwmc388b   | 3A | 136.9 |
| Xwmc594    | 3A | 142   |
| Xgwm666b   | 3A | 143   |
| wPt-1864   | 3A | 148   |
| wPt-2866   | 3A | 148   |
| P78/M69.3  | 3A | 149.3 |
| wPt-1688   | 3A | 149.9 |
| M71/P77.1  | 3A | 152.9 |
| P78/M69.8  | 3A | 152.9 |
| Xgwm480    | 3A | 152.9 |
| wPt-3816   | 3A | 156   |
| wPt-2659   | 3A | 156.2 |
| tPt-7492   | 3A | 157.4 |
| wPt-5125   | 3A | 157.4 |
| wPt-5133   | 3A | 157.4 |

|               |    |       |
|---------------|----|-------|
| Xwmc206       | 3A | 165.9 |
| Xfbb293.1     | 3A | 167.9 |
| wPt-9422      | 3A | 168.8 |
| Xpsr1203.1    | 3A | 170.3 |
| Xbcd1773b     | 3A | 171.3 |
| Xfbb293       | 3A | 171.3 |
| wPt-1694      | 3A | 172.7 |
| wPt-4398      | 3A | 172.7 |
| wPt-9238      | 3A | 172.7 |
| wPt-2492      | 3A | 175.1 |
| QFhs.inra-3A  | 3A | 176.3 |
| Xmwg30b       | 3A | 176.3 |
| Xbarc314      | 3A | 176.3 |
| Xfba347       | 3A | 178.3 |
| Xbarc197.1    | 3A | 179.3 |
| Xgpw2270      | 3A | 179.3 |
| Xgwm391       | 3A | 179.3 |
| TC77302       | 3A | 179.5 |
| Xfbb260       | 3A | 180.3 |
| wPt-3978      | 3A | 181.9 |
| Xbcd1431.1    | 3A | 182.3 |
| Xfbb250       | 3A | 183.3 |
| Xgwm247       | 3A | 183.3 |
| QPhs.occsu-3A | 3A | 184.3 |
| R-A1          | 3A | 184.3 |
| Xfba242       | 3A | 184.3 |
| Xwg184        | 3A | 184.3 |
| Xfbb322b      | 3A | 185.3 |
| XgbxG242      | 3A | 189.3 |
| Xgwm107       | 3A | 193.3 |
| Xmwg570       | 3A | 193.3 |
| wPt-2144      | 3A | 193.6 |
| wPt-9160      | 3A | 193.6 |
| wPt-0398      | 3A | 196   |
| Xpsr78        | 3A | 197.3 |
| Xcdo113       | 3A | 203.3 |
| Xbcd358       | 3A | 221.3 |
| XE5M5h        | 3A | 225.3 |
| P78/M92.3     | 3B | 0     |
| Xfba189a      | 3B | 2     |
| M21/P76.3     | 3B | 3     |
| P78/M43.11    | 3B | 4     |
| XWB075j       | 3B | 5     |
| XWB133j       | 3B | 5     |
| XWB147j       | 3B | 5     |

|               |    |      |
|---------------|----|------|
| XgpwE11a      | 3B | 5    |
| Xpsr345.1     | 3B | 5    |
| Xpsr913       | 3B | 5    |
| P78/M59.2     | 3B | 6    |
| XE3M3         | 3B | 6    |
| Stb2          | 3B | 7    |
| XMxE8M3m      | 3B | 7    |
| Xbcd907.1     | 3B | 7    |
| Xfbb147a      | 3B | 9    |
| XksuG30a      | 3B | 9    |
| QSng.sfr-3B   | 3B | 10   |
| Sr2           | 3B | 10   |
| Xbarc75       | 3B | 10   |
| Xbarc180      | 3B | 10.2 |
| TC89014       | 3B | 10.5 |
| Xwmc430a      | 3B | 11.4 |
| Xgwm389       | 3B | 11.8 |
| Xwmc674       | 3B | 12.3 |
| Xfba190.2     | 3B | 13.9 |
| Xfbb156a      | 3B | 13.9 |
| Xgwm533a      | 3B | 13.9 |
| Xmag2095      | 3B | 14.4 |
| XksuG53       | 3B | 14.7 |
| Xbarc133      | 3B | 15.7 |
| Xbarc147      | 3B | 15.7 |
| Xfba311       | 3B | 15.7 |
| wPt-7264      | 3B | 16.7 |
| wPt-7225      | 3B | 17.1 |
| wPt-5697      | 3B | 17.3 |
| P78/M69.5     | 3B | 17.4 |
| Xcfd79b       | 3B | 17.4 |
| Lr27          | 3B | 18.4 |
| Xfbb166.1     | 3B | 18.4 |
| Xpsr375.5     | 3B | 18.4 |
| Xpsr567.2     | 3B | 18.4 |
| wPt-10503     | 3B | 20.6 |
| M62/P64.7     | 3B | 20.8 |
| QFhs.ndsu-3BS | 3B | 20.8 |
| Xgwm493       | 3B | 20.8 |
| F103          | 3B | 21   |
| wPt-10291     | 3B | 21.2 |
| wPt-10388     | 3B | 21.2 |
| Xbarc87       | 3B | 21.5 |
| wPt-6129      | 3B | 21.5 |
| wPt-10239     | 3B | 22   |

|              |    |      |
|--------------|----|------|
| Xcfd79       | 3B | 22.3 |
| Xwmc754      | 3B | 22.3 |
| Xbarc92      | 3B | 23.2 |
| wPt-1516     | 3B | 23.6 |
| Xblt4.1      | 3B | 23.9 |
| Xcdo460      | 3B | 23.9 |
| Xcdo583a     | 3B | 23.9 |
| wPt-1132a    | 3B | 25   |
| Stb14        | 3B | 25.1 |
| Xbcd1418     | 3B | 25.1 |
| Xbcd809a     | 3B | 26.1 |
| Xtam47.2     | 3B | 26.1 |
| Xwmc43a      | 3B | 26.1 |
| wPt-11454    | 3B | 26.3 |
| wPt-10372    | 3B | 26.7 |
| XATPase.1    | 3B | 27.3 |
| Xfbb185      | 3B | 27.3 |
| tPt-1079     | 3B | 27.8 |
| Xbcd1380A    | 3B | 28.6 |
| wPt-7341     | 3B | 29.3 |
| wPt-8855     | 3B | 29.3 |
| P38/M61-4    | 3B | 29.9 |
| Xbcd1278     | 3B | 29.9 |
| wPt-7984     | 3B | 30.2 |
| wPt-8079     | 3B | 30.9 |
| Xglk683/Sun2 | 3B | 31.2 |
| XksuE3       | 3B | 31.2 |
| wPt-10333    | 3B | 31.8 |
| Xtam61.1     | 3B | 32.4 |
| Xmag501      | 3B | 32.7 |
| Xwmc430b     | 3B | 32.8 |
| Xgpw1107     | 3B | 33.5 |
| wPt-2757a    | 3B | 34.2 |
| wPt-1081a    | 3B | 34.3 |
| wPt-3609     | 3B | 34.3 |
| Xwmc597      | 3B | 35.2 |
| Xgwm533b     | 3B | 35.7 |
| wPt-7212     | 3B | 35.7 |
| wPt-3598     | 3B | 35.8 |
| wPt-9410     | 3B | 35.8 |
| wPt-5064     | 3B | 35.9 |
| wPt-0302     | 3B | 36.9 |
| wPt-3536     | 3B | 36.9 |
| wPt-10714    | 3B | 38   |
| Xfbb1851     | 3B | 39   |

|            |    |      |
|------------|----|------|
| Xcfd28     | 3B | 40   |
| Xwmc623    | 3B | 40.9 |
| Xbarc102   | 3B | 41.5 |
| Xglk538a   | 3B | 41.5 |
| wPt-7132   | 3B | 43   |
| wPt-9012   | 3B | 43   |
| wPt-4653   | 3B | 43.1 |
| Xwmc808    | 3B | 43.5 |
| wPt-9010   | 3B | 45   |
| wPt-4842   | 3B | 45.2 |
| tPt-6487   | 3B | 45.6 |
| wPt-4739   | 3B | 46   |
| Xwmc679    | 3B | 46.1 |
| wPt-6335   | 3B | 46.9 |
| wPt-7860   | 3B | 47.2 |
| wPt-8828   | 3B | 47.6 |
| wPt-10436  | 3B | 47.7 |
| wPt-5432   | 3B | 48.6 |
| Xwmc500    | 3B | 49.1 |
| Xcdo395    | 3B | 49.2 |
| wPt-2961   | 3B | 49.3 |
| wPt-9107   | 3B | 50.1 |
| wPt-6742   | 3B | 51.7 |
| Xwmc43     | 3B | 52.1 |
| Xwmc51     | 3B | 52.4 |
| wPt-0672   | 3B | 53.2 |
| wPt-10005  | 3B | 53.7 |
| wPt-10230  | 3B | 53.7 |
| wPt-10277  | 3B | 53.7 |
| wPt-4431   | 3B | 53.7 |
| wPt-8990   | 3B | 53.7 |
| wPt-9250   | 3B | 53.7 |
| Xwmc78     | 3B | 54.2 |
| XWB068j    | 3B | 55.2 |
| Xgpw1108a  | 3B | 55.2 |
| Xwmc007    | 3B | 55.2 |
| M60/P64.11 | 3B | 56.2 |
| P78/M87.2  | 3B | 56.2 |
| Xgpw1145   | 3B | 56.2 |
| Xgpw1146a  | 3B | 56.2 |
| Xfba91.2   | 3B | 57.2 |
| Xgpw1201b  | 3B | 57.2 |
| wPt-3046   | 3B | 57.7 |
| wPt-8686   | 3B | 57.8 |
| wPt-1406   | 3B | 58.1 |

|            |    |      |
|------------|----|------|
| M83/P65.10 | 3B | 58.2 |
| Xfba91     | 3B | 58.2 |
| Xwmc540a   | 3B | 58.6 |
| wPt-10052  | 3B | 58.7 |
| wPt-10541  | 3B | 58.7 |
| wPt-10729  | 3B | 58.7 |
| wPt-11103  | 3B | 58.7 |
| wPt-11194  | 3B | 58.7 |
| wPt-11276  | 3B | 58.7 |
| wPt-11443  | 3B | 58.7 |
| wPt-2567   | 3B | 58.7 |
| wPt-2784   | 3B | 58.7 |
| wPt-3410   | 3B | 58.7 |
| wPt-6008   | 3B | 58.7 |
| wPt-7357   | 3B | 58.7 |
| wPt-8643   | 3B | 58.7 |
| wPt-9495   | 3B | 58.7 |
| wPt-1349   | 3B | 58.8 |
| wPt-10958  | 3B | 58.9 |
| Xscu3H03   | 3B | 59   |
| Xwmc85.2   | 3B | 59   |
| rPt-5853   | 3B | 59.1 |
| tPt-8143   | 3B | 59.2 |
| wPt-2013   | 3B | 59.3 |
| wPt-4476   | 3B | 59.3 |
| wPt-5215   | 3B | 59.3 |
| wPt-6066   | 3B | 59.3 |
| tPt-9273   | 3B | 59.4 |
| wPt-4292   | 3B | 59.4 |
| wPt-8592   | 3B | 59.6 |
| wPt-9982   | 3B | 59.6 |
| wPt-5244   | 3B | 59.8 |
| wPt-10540  | 3B | 59.9 |
| wPt-10969  | 3B | 59.9 |
| wPt-8356   | 3B | 59.9 |
| wPt-10389  | 3B | 60   |
| wPt-2720   | 3B | 60   |
| wPt-4777   | 3B | 60   |
| wPt-5495   | 3B | 60   |
| wPt-7677   | 3B | 60   |
| wPt-8126   | 3B | 60   |
| Xbarc218   | 3B | 60   |
| Xgwm144    | 3B | 60   |
| wPt-10420  | 3B | 60.1 |
| wPt-10677  | 3B | 60.1 |

|            |    |      |
|------------|----|------|
| wPt-9088   | 3B | 60.2 |
| wPt-10552  | 3B | 60.3 |
| Xgwm383    | 3B | 60.4 |
| wPt-0995   | 3B | 60.5 |
| wPt-2403   | 3B | 60.5 |
| wPt-2748   | 3B | 60.5 |
| wPt-5716   | 3B | 60.5 |
| wPt-7015   | 3B | 60.5 |
| wPt-7024b  | 3B | 60.5 |
| wPt-7142   | 3B | 60.5 |
| wPt-7229   | 3B | 60.5 |
| wPt-7266   | 3B | 60.5 |
| wPt-9432   | 3B | 60.5 |
| Xgwm566    | 3B | 60.6 |
| Xfbb24     | 3B | 61.4 |
| Xgpw1120   | 3B | 61.4 |
| Xbarc173   | 3B | 61.5 |
| wPt-9310   | 3B | 61.5 |
| wPt-10080  | 3B | 61.6 |
| wPt-1159   | 3B | 61.7 |
| wPt-2936   | 3B | 61.7 |
| wPt-4209   | 3B | 61.7 |
| wPt-8579   | 3B | 61.7 |
| wPt-9510   | 3B | 61.7 |
| wPt-6239   | 3B | 62.2 |
| Xcfa2241   | 3B | 62.8 |
| wPt-0644   | 3B | 62.8 |
| wPt-5390   | 3B | 63.5 |
| wPt-7614   | 3B | 63.9 |
| Xbarc139   | 3B | 64.2 |
| wPt-1625   | 3B | 64.3 |
| wPt-4597   | 3B | 64.3 |
| Xgwm685    | 3B | 64.7 |
| Xfbb142    | 3B | 65.3 |
| Xpsp3030.1 | 3B | 65.3 |
| M60/P64.5a | 3B | 66.3 |
| Xgwm156    | 3B | 66.3 |
| Xwmc69     | 3B | 66.3 |
| wPt-9170   | 3B | 66.7 |
| CA499601   | 3B | 70   |
| wPt-6047   | 3B | 70   |
| wPt-9579   | 3B | 70.1 |
| wPt-5105   | 3B | 70.3 |
| wPt-5640   | 3B | 70.4 |
| wPt-7934a  | 3B | 70.4 |



|            |    |      |
|------------|----|------|
| wPt-2377   | 3B | 70.8 |
| wPt-3760   | 3B | 70.9 |
| Xgwm264    | 3B | 71.2 |
| wPt-0438   | 3B | 71.2 |
| Xwmc231    | 3B | 71.5 |
| Xgwm284    | 3B | 71.8 |
| Xbarc68    | 3B | 72.3 |
| Xgwm72     | 3B | 72.3 |
| Xpsr689    | 3B | 72.3 |
| wPt-6973   | 3B | 72.3 |
| Xwmc815    | 3B | 72.4 |
| Xwmc675    | 3B | 72.5 |
| Xwmc505    | 3B | 72.7 |
| Xcfd6      | 3B | 73.1 |
| Xwmc777    | 3B | 73.1 |
| wPt-2119   | 3B | 73.1 |
| Xwmc612    | 3B | 73.6 |
| Xpsr902    | 3B | 73.7 |
| wPt-0695   | 3B | 73.8 |
| Xwmc625    | 3B | 73.9 |
| XgbxG392   | 3B | 74.1 |
| Xpsp3144   | 3B | 74.1 |
| Xbarc73    | 3B | 74.2 |
| Xwmc693    | 3B | 74.5 |
| Xbcd809    | 3B | 74.6 |
| wPt-5906   | 3B | 74.7 |
| Xwmc544    | 3B | 74.8 |
| Xwmc695    | 3B | 74.8 |
| Xgwm285    | 3B | 75.1 |
| Xwmc446    | 3B | 75.1 |
| Xgwm274    | 3B | 75.3 |
| Xwmc615    | 3B | 75.6 |
| Xwmc366    | 3B | 75.8 |
| Xwmc1      | 3B | 75.9 |
| Xwmc533    | 3B | 76.4 |
| Xwmc762    | 3B | 76.5 |
| Xwmc751    | 3B | 76.7 |
| XksuG59    | 3B | 76.8 |
| Xgwm644    | 3B | 76.9 |
| P40/M54-3  | 3B | 77.5 |
| P78/M69.2  | 3B | 77.5 |
| Xopa10-500 | 3B | 77.5 |
| Xcfd4a     | 3B | 77.5 |
| Xgwm376    | 3B | 77.5 |
| Xcfd4      | 3B | 77.7 |

|            |    |      |
|------------|----|------|
| XPc-A12a   | 3B | 79.4 |
| Xfbb315    | 3B | 79.4 |
| XgbxR080   | 3B | 79.4 |
| Xpsr903    | 3B | 79.4 |
| Xwmc395    | 3B | 79.4 |
| Xgwm77     | 3B | 79.4 |
| P34/M51-67 | 3B | 80.4 |
| Xabg471    | 3B | 80.4 |
| Xcni8      | 3B | 80.4 |
| Xbarc187   | 3B | 80.7 |
| Xwmc307    | 3B | 80.8 |
| wPt-6802   | 3B | 80.8 |
| Xbcd1418a  | 3B | 81   |
| P41/M39-1  | 3B | 81   |
| Xcdo1164   | 3B | 81   |
| Xfbb117.1  | 3B | 81   |
| Xpsr156    | 3B | 81   |
| S-B1       | 3B | 81.5 |
| P35/M61-8  | 3B | 82   |
| Xfba189    | 3B | 82   |
| XATPase.2  | 3B | 83   |
| Xcdo328    | 3B | 83   |
| Xgwm888    | 3B | 83   |
| Xwmc527a   | 3B | 83   |
| tPt-0353a  | 3B | 83   |
| rPt-5396   | 3B | 83.1 |
| wPt-4127   | 3B | 83.1 |
| wPt-7502   | 3B | 83.1 |
| Xwmc653    | 3B | 83.2 |
| Xgwm107    | 3B | 83.6 |
| wPt-4082   | 3B | 83.6 |
| Xfbb110    | 3B | 83.8 |
| Xfbb235    | 3B | 83.8 |
| XksuH7     | 3B | 83.8 |
| Xpsr170a   | 3B | 83.8 |
| Xwmc471    | 3B | 84   |
| Xwmc182    | 3B | 84.3 |
| wPt-3327   | 3B | 84.4 |
| P34/M48-5  | 3B | 84.9 |
| P34/M50-10 | 3B | 84.9 |
| P36/M48-6  | 3B | 84.9 |
| Xbcd1283   | 3B | 84.9 |
| Xbcd1380   | 3B | 84.9 |
| Xbcd1380B  | 3B | 84.9 |
| Xfba213    | 3B | 84.9 |

|            |    |      |
|------------|----|------|
| Xfbb156b   | 3B | 84.9 |
| Xfbb283    | 3B | 84.9 |
| XgbxG469   | 3B | 84.9 |
| Xgwm112    | 3B | 84.9 |
| Xgwm533    | 3B | 84.9 |
| Xpsp3112.1 | 3B | 84.9 |
| M77/P64.5  | 3B | 85.9 |
| Xfba214    | 3B | 85.9 |
| Xfba220    | 3B | 85.9 |
| Xfbb348    | 3B | 85.9 |
| Xopf3-960  | 3B | 85.9 |
| M67/P77.3  | 3B | 86.9 |
| Xcni3d     | 3B | 86.9 |
| Xfbb177    | 3B | 86.9 |
| Xpsp3081b  | 3B | 86.9 |
| Xgwm131    | 3B | 86.9 |
| Tsn2       | 3B | 87.9 |
| XgbxG773   | 3B | 87.9 |
| Xbarc164   | 3B | 87.9 |
| wPt-1940   | 3B | 88   |
| wPt-7786   | 3B | 88   |
| Xwmc527    | 3B | 88.2 |
| TC74823b   | 3B | 88.3 |
| wPt-5769   | 3B | 88.3 |
| Xwmc418    | 3B | 88.4 |
| Xwmc334    | 3B | 88.6 |
| Xwmc827    | 3B | 89   |
| wPt-4599   | 3B | 89.1 |
| Xcfa2134   | 3B | 89.3 |
| Xbarc358   | 3B | 89.4 |
| wPt-6718   | 3B | 89.5 |
| Xbarc145   | 3B | 89.6 |
| Pm41       | 3B | 90.4 |
| Xwmc787    | 3B | 90.5 |
| Xcfd283    | 3B | 94.2 |
| Xgwm4b     | 3B | 94.8 |
| wPt-8886a  | 3B | 94.9 |
| Xcfd283a   | 3B | 95.1 |
| rPt-7068   | 3B | 96.2 |
| wPt-2280   | 3B | 96.2 |
| wPt-7688   | 3B | 96.7 |
| wPt-0280   | 3B | 96.8 |
| wPt-8141   | 3B | 96.8 |
| Xbarc229   | 3B | 97.2 |
| tPt-3599   | 3B | 97.2 |

|             |    |       |
|-------------|----|-------|
| wPt-10270   | 3B | 97.2  |
| wPt-10437   | 3B | 97.2  |
| wPt-10442   | 3B | 97.2  |
| wPt-10600   | 3B | 97.2  |
| wPt-11304   | 3B | 97.2  |
| wPt-7145    | 3B | 97.2  |
| wPt-8964    | 3B | 97.2  |
| wPt-8412    | 3B | 97.6  |
| wPt-4719    | 3B | 98.4  |
| Xwmc291     | 3B | 98.7  |
| Xmwg818     | 3B | 99.7  |
| QTwt.crc-3B | 3B | 100.7 |
| Xbarc344    | 3B | 100.7 |
| Br-B1       | 3B | 101.7 |
| M60/P64.13  | 3B | 101.7 |
| Xcdo583b    | 3B | 101.7 |
| Xfba242     | 3B | 101.7 |
| Xcdo718     | 3B | 101.7 |
| M77/P64.1   | 3B | 103.7 |
| M86/P65.4   | 3B | 103.7 |
| P78/M92.0   | 3B | 103.7 |
| P78/M92.6   | 3B | 103.7 |
| XksuG62     | 3B | 103.7 |
| P78/M92.5   | 3B | 104.7 |
| XksuF34     | 3B | 104.7 |
| Xmwg69      | 3B | 104.7 |
| Xfbb147     | 3B | 105.7 |
| P41/M48-4   | 3B | 106.7 |
| Xbcd141     | 3B | 106.7 |
| Xbcd147     | 3B | 106.7 |
| Xbcd1555    | 3B | 106.7 |
| Xfbb168     | 3B | 106.7 |
| Xgwm108     | 3B | 106.7 |
| wPt-0846    | 3B | 107.2 |
| wPt-10029   | 3B | 107.2 |
| wPt-6981    | 3B | 107.2 |
| wPt-9694    | 3B | 107.4 |
| wPt-1191    | 3B | 107.6 |
| TC87011     | 3B | 108.4 |
| wPt-4693    | 3B | 109   |
| wPt-10071   | 3B | 109.5 |
| wPt-0065    | 3B | 109.7 |
| Xcfa2170    | 3B | 110.2 |
| wPt-0384    | 3B | 110.3 |
| wPt-10785   | 3B | 110.3 |

|            |    |       |
|------------|----|-------|
| wPt-11301  | 3B | 110.3 |
| wPt-8480   | 3B | 110.3 |
| wPt-3856   | 3B | 110.4 |
| wPt-8238   | 3B | 110.9 |
| Xwmc54     | 3B | 111.1 |
| rPt-5523   | 3B | 111.9 |
| tPt-4541   | 3B | 112.5 |
| wPt-6961   | 3B | 112.5 |
| P36/M35-1  | 3B | 112.9 |
| P37/M53-4  | 3B | 112.9 |
| P39/M50-4  | 3B | 112.9 |
| XgbxG037b  | 3B | 112.9 |
| wPt-6785   | 3B | 113.8 |
| P34/M50-5  | 3B | 114.3 |
| P35/M37-7  | 3B | 114.3 |
| P35/M37-9  | 3B | 114.3 |
| Xbcd21     | 3B | 114.3 |
| XgbxG065   | 3B | 114.3 |
| XgbxG199   | 3B | 114.3 |
| Xbarc84    | 3B | 114.3 |
| wPt-1311   | 3B | 114.5 |
| wPt-10505  | 3B | 114.9 |
| wPt-5072   | 3B | 114.9 |
| wPt-5833   | 3B | 114.9 |
| wPt-7968   | 3B | 114.9 |
| wPt-8318   | 3B | 114.9 |
| P32/M36-1  | 3B | 114.9 |
| P32/M59-11 | 3B | 114.9 |
| Xfbb378    | 3B | 114.9 |
| wPt-8396   | 3B | 115.4 |
| wPt-6187   | 3B | 115.8 |
| P38/M42-4  | 3B | 115.9 |
| Xfbb274    | 3B | 115.9 |
| Xmwg11a    | 3B | 115.9 |
| wPt-10201  | 3B | 116   |
| wPt-3921   | 3B | 116.1 |
| Xbarc206   | 3B | 117   |
| P31/M50-3  | 3B | 118.4 |
| XWB084j    | 3B | 118.4 |
| Xfba133a   | 3B | 118.4 |
| wPt-10185  | 3B | 118.5 |
| wPt-3725   | 3B | 118.6 |
| wPt-2416   | 3B | 118.7 |
| P39/M50-3  | 3B | 119.4 |
| Xpsr1205   | 3B | 120.4 |

|                  |    |       |
|------------------|----|-------|
| Xbarc7           | 3B | 121.4 |
| Xabc174          | 3B | 122.4 |
| Xwmc687          | 3B | 123.1 |
| XWB077j          | 3B | 123.5 |
| P40/M60-3        | 3B | 124.5 |
| Xwmc326          | 3B | 124.5 |
| Xgwm4            | 3B | 124.5 |
| Xbarc77          | 3B | 127.4 |
| wPt-9826         | 3B | 127.7 |
| Xfba167a         | 3B | 128   |
| Xfba171          | 3B | 128   |
| wPt-8096         | 3B | 129.1 |
| Xfba360          | 3B | 130   |
| Xwia858.1(Glb35) | 3B | 130   |
| P78/M69.7        | 3B | 131   |
| Xpsr386.4        | 3B | 131   |
| Xwmc206          | 3B | 131.1 |
| wPt-4412         | 3B | 132.4 |
| wPt-9158         | 3B | 132.6 |
| wPt-9714         | 3B | 132.6 |
| P32/M37-2        | 3B | 132.9 |
| P32/M37-4        | 3B | 132.9 |
| P32/M37-5        | 3B | 132.9 |
| XSsia            | 3B | 132.9 |
| Xbcd131          | 3B | 132.9 |
| wPt-9882         | 3B | 133.8 |
| Xbg131           | 3B | 133.9 |
| wPt-5704         | 3B | 135.1 |
| Xcdo105          | 3B | 136   |
| wPt-0668         | 3B | 136.4 |
| wPt-8276         | 3B | 136.5 |
| tPt-5389         | 3B | 136.8 |
| wPt-9892         | 3B | 136.9 |
| wPt-9989         | 3B | 137.2 |
| wPt-2172         | 3B | 137.4 |
| wPt-10680        | 3B | 137.5 |
| wPt-7416         | 3B | 137.6 |
| wPt-6725         | 3B | 138   |
| Xfba310          | 3B | 138.1 |
| Xfbb293          | 3B | 138.1 |
| Xtam63b          | 3B | 139.1 |
| wPt-11262        | 3B | 139.5 |
| wPt-10247        | 3B | 139.6 |
| wPt-10562        | 3B | 139.6 |
| wPt-10336        | 3B | 139.7 |

|           |    |       |
|-----------|----|-------|
| wPt-10706 | 3B | 139.7 |
| wPt-10812 | 3B | 139.7 |
| wPt-11152 | 3B | 139.7 |
| wPt-3254  | 3B | 139.7 |
| wPt-11691 | 3B | 139.9 |
| wPt-10851 | 3B | 140   |
| wPt-10925 | 3B | 140.5 |
| wPt-4991  | 3B | 140.9 |
| wPt-1884  | 3B | 141   |
| Xmag695   | 3B | 141.1 |
| wPt-0021  | 3B | 141.1 |
| wPt-3342  | 3B | 141.1 |
| wPt-3480  | 3B | 141.1 |
| wPt-8959  | 3B | 141.1 |
| wPt-9786  | 3B | 141.1 |
| wPt-5295  | 3B | 141.9 |
| Xgwm299   | 3B | 142   |
| M17/P65.2 | 3B | 144.1 |
| Xgwm114   | 3B | 144.1 |
| Xpsr931   | 3B | 145   |
| wPt-8021  | 3B | 148.5 |
| Xwmc236   | 3B | 151.9 |
| Xfba217   | 3B | 153.9 |
| Xfbb316   | 3B | 153.9 |
| Xfba235   | 3B | 155.9 |
| Xpsp2151  | 3B | 155.9 |
| tPt-1093  | 3B | 155.9 |
| wPt-4194  | 3B | 155.9 |
| wPt-5947  | 3B | 155.9 |
| wPt-8559  | 3B | 155.9 |
| Xfba8     | 3B | 156.9 |
| Xfba167b  | 3B | 157.9 |
| tPt-7209b | 3B | 158.6 |
| wPt-10000 | 3B | 158.6 |
| wPt-10025 | 3B | 158.6 |
| wPt-10240 | 3B | 158.6 |
| wPt-10428 | 3B | 158.6 |
| wPt-10555 | 3B | 158.6 |
| wPt-10829 | 3B | 158.6 |
| wPt-10890 | 3B | 158.6 |
| wPt-11082 | 3B | 158.6 |
| wPt-11088 | 3B | 158.6 |
| wPt-11330 | 3B | 158.6 |
| wPt-3153  | 3B | 158.6 |
| wPt-4517  | 3B | 158.6 |

|               |    |       |
|---------------|----|-------|
| wPt-7802      | 3B | 158.6 |
| wPt-9185      | 3B | 158.6 |
| wPt-9766      | 3B | 158.6 |
| wPt-8845      | 3B | 158.9 |
| Xpsp3001.2    | 3B | 158.9 |
| wPt-8752      | 3B | 159.4 |
| wPt-5268      | 3B | 160.1 |
| Xgwm181       | 3B | 160.9 |
| Xgwm547       | 3B | 161.9 |
| wPt-6956      | 3B | 162   |
| wPt-5943b     | 3B | 162.7 |
| Xgwm751b      | 3B | 163.4 |
| wPt-2491      | 3B | 164.9 |
| Qsst.msub-3BL | 3B | 166.8 |
| Xfba133b      | 3B | 166.8 |
| Xgwm247       | 3B | 166.8 |
| Xwmc261       | 3B | 167.4 |
| Xwmc274       | 3B | 167.5 |
| Xwmc632       | 3B | 168.3 |
| Xpsr604       | 3B | 168.5 |
| Xpsr454       | 3B | 168.8 |
| Xmwg11b       | 3B | 170.2 |
| wPt-10303     | 3B | 172.7 |
| wPt-11000     | 3B | 172.7 |
| wPt-11253     | 3B | 172.7 |
| Xgwm340       | 3B | 173   |
| wPt-4225      | 3B | 173.4 |
| wPt-10589     | 3B | 173.8 |
| wPt-0990      | 3B | 174.7 |
| wPt-6000      | 3B | 175.4 |
| R-D1          | 3B | 178.1 |
| wPt-1472      | 3B | 180.9 |
| wPt-7301      | 3B | 184.2 |
| D1.1_ctg787_1 | 3D | 0     |
| Xcdo549a      | 3D | 0     |
| Xcfd35        | 3D | 0     |
| XWC0035q      | 3D | 2     |
| Xwmc155b      | 3D | 2     |
| wPt-1336      | 3D | 2.3   |
| M65/P64.6     | 3D | 3     |
| M71/P77.4     | 3D | 3     |
| wPt-6358b     | 3D | 3.1   |
| Xgwm71        | 3D | 3.3   |
| Xwmc630       | 3D | 3.3   |
| wPt-9401      | 3D | 5.8   |



|                 |    |      |
|-----------------|----|------|
| wPt-1741        | 3D | 6.1  |
| wPt-1081b       | 3D | 6.5  |
| wPt-2757b       | 3D | 6.7  |
| Xcfd127         | 3D | 7    |
| Xcfd152         | 3D | 7    |
| Xcni2a          | 3D | 10.7 |
| Xgwm161         | 3D | 10.7 |
| Xwmc674         | 3D | 10.7 |
| Xgwm183a        | 3D | 14.7 |
| Xcfd141         | 3D | 19.7 |
| Xbarc321.2      | 3D | 22.7 |
| Xgpw1106a       | 3D | 22.7 |
| XgpwE11b        | 3D | 22.7 |
| XWD173q         | 3D | 24.7 |
| Xcfd55          | 3D | 25.7 |
| D1.1_ctg1734_1  | 3D | 28.7 |
| Xbcd907a        | 3D | 28.7 |
| D1.1_ctg5743    | 3D | 29.7 |
| Xabc171x        | 3D | 29.7 |
| Xcfd79a         | 3D | 29.7 |
| Xfbb278.1       | 3D | 29.7 |
| XgbxG265        | 3D | 29.7 |
| Xwmc43          | 3D | 30.3 |
| Xwmc11          | 3D | 30.8 |
| Xfba190         | 3D | 31.8 |
| Xfbb370         | 3D | 31.8 |
| Xgwm161b        | 3D | 31.8 |
| D1.1_ctg4173    | 3D | 33.8 |
| Xbcd1802        | 3D | 33.8 |
| Xbarc128        | 3D | 34   |
| Xgpw322         | 3D | 36.1 |
| Xgwm2           | 3D | 36.1 |
| Xcfd70a         | 3D | 40.1 |
| Xcfd79          | 3D | 45.1 |
| Xgwm183         | 3D | 47.6 |
| Xgpw1007        | 3D | 52.6 |
| Xbarc8          | 3D | 53.6 |
| D1.1_ctg787_2   | 3D | 54.6 |
| Xcdo549b        | 3D | 54.6 |
| Xcfd64          | 3D | 54.6 |
| Xglk538c        | 3D | 57.6 |
| Xcfd34          | 3D | 58.6 |
| D1.1_ctg7512    | 3D | 60.6 |
| Xfba241         | 3D | 60.6 |
| D1.1_ctg12778-1 | 3D | 61.6 |

|                 |    |       |
|-----------------|----|-------|
| D1.1_ctg4333_1  | 3D | 61.6  |
| XksuA6.2        | 3D | 61.6  |
| Xbcd1532        | 3D | 64.6  |
| Xcdo1435        | 3D | 66.6  |
| D1.1_ctg6151_1  | 3D | 67.6  |
| D1.1_ctg6228_1  | 3D | 67.6  |
| D1.1_ctg9045    | 3D | 67.6  |
| Xcdo407         | 3D | 67.6  |
| Xfba91a         | 3D | 67.6  |
| Xwmc529b        | 3D | 68.6  |
| D1.1_ctg6151_2  | 3D | 69.6  |
| D1.1_ctg6228_2  | 3D | 69.6  |
| Xfba91          | 3D | 69.6  |
| Xmwg22.2        | 3D | 69.6  |
| Xgwm2b          | 3D | 70.6  |
| Xgwm314         | 3D | 70.6  |
| Xgwm383         | 3D | 72    |
| Xgwm383b        | 3D | 76.6  |
| Xgwm664         | 3D | 83.7  |
| Xwmc505d        | 3D | 83.9  |
| D1.1_ctg12778_2 | 3D | 84.9  |
| D1.1_ctg4333_2  | 3D | 84.9  |
| XksuA6          | 3D | 84.9  |
| Xpsr394         | 3D | 85.9  |
| Xwmc443         | 3D | 85.9  |
| Xwmc375.1       | 3D | 86.9  |
| Xcfd2d          | 3D | 87.9  |
| Xgpw297b        | 3D | 87.9  |
| S-D1            | 3D | 88.9  |
| Xgwm114a        | 3D | 90.7  |
| Xbarc42         | 3D | 90.9  |
| Xbarc52         | 3D | 91.1  |
| Xwmc492         | 3D | 92.5  |
| Xcfd201         | 3D | 94.4  |
| Xgdm136         | 3D | 96.4  |
| Xgdm136c        | 3D | 96.4  |
| Xgdm99          | 3D | 98.8  |
| Xgwm707         | 3D | 99.4  |
| Xcfd223         | 3D | 99.8  |
| D1.1_ctg290     | 3D | 100.6 |
| D1.1_ctg4430    | 3D | 100.6 |
| Xcfd4a          | 3D | 100.6 |
| Xfba213         | 3D | 100.6 |
| Xfba214         | 3D | 100.6 |
| Xfbb324         | 3D | 100.6 |

|                |    |       |
|----------------|----|-------|
| Xgpw1146b      | 3D | 100.6 |
| Xbarc68        | 3D | 100.6 |
| Xgwm497        | 3D | 100.8 |
| Xgwm52         | 3D | 102.4 |
| Xgwm456        | 3D | 102.7 |
| Xgpw1168       | 3D | 103.3 |
| Xgpw1251a      | 3D | 103.3 |
| Xgwm191        | 3D | 103.3 |
| Xgwm341        | 3D | 103.3 |
| Xgpw333        | 3D | 104.3 |
| Xopb8-550      | 3D | 104.3 |
| QGwt.crc-3D    | 3D | 105.3 |
| Xbarc6         | 3D | 105.3 |
| Xmwg688        | 3D | 105.3 |
| D1.1_ctg3640   | 3D | 107.3 |
| XWB042q        | 3D | 107.3 |
| Xbcd134        | 3D | 107.3 |
| Xcfd71         | 3D | 107.4 |
| Xwmc741        | 3D | 107.4 |
| Xwmc505        | 3D | 108.9 |
| Xcfd2          | 3D | 109.1 |
| Xcfd62         | 3D | 109.4 |
| Xcfd70         | 3D | 109.6 |
| Xabc176        | 3D | 110   |
| Xwmc533        | 3D | 111.3 |
| Xwmc656        | 3D | 111.3 |
| D1.1_ctg8418_1 | 3D | 111.8 |
| Xfbb23.1       | 3D | 111.8 |
| XgbxG305       | 3D | 111.8 |
| Xcfd193        | 3D | 111.9 |
| Xbarc125       | 3D | 113.3 |
| P78/M49.5      | 3D | 113.4 |
| Xcfd4          | 3D | 113.8 |
| Xcdo1406       | 3D | 114.3 |
| Xopab9-300     | 3D | 116.3 |
| M83/P65.9      | 3D | 117.3 |
| Xbcd288        | 3D | 117.3 |
| Xfba159        | 3D | 118.3 |
| Xgwm645        | 3D | 118.3 |
| Xwmc435        | 3D | 118.6 |
| Xcfd9          | 3D | 120.2 |
| Xwmc529        | 3D | 120.3 |
| Xwmc418        | 3D | 123.9 |
| Xcni5b         | 3D | 125   |
| Xwmc631        | 3D | 125.3 |

|                  |    |       |
|------------------|----|-------|
| D1.1_ctg8418_2   | 3D | 127.2 |
| P78/M43.13       | 3D | 127.2 |
| Xfbb23.2         | 3D | 127.2 |
| Xfbb237a         | 3D | 127.2 |
| XgbxR187         | 3D | 127.2 |
| Xwia858.2(Glb35) | 3D | 128.2 |
| D1.1_ctg1734_2   | 3D | 130.2 |
| D1.1_ctg6064     | 3D | 130.2 |
| D1.1_ctg8441     | 3D | 130.2 |
| P35/M50-3        | 3D | 130.2 |
| Xbcd907b         | 3D | 130.2 |
| Xcnl4.1          | 3D | 130.2 |
| Xpsr1203.2       | 3D | 130.2 |
| Xpsr170a         | 3D | 130.2 |
| D1.1_ctg5766     | 3D | 131.2 |
| P78/M59.3        | 3D | 131.2 |
| Xfba330          | 3D | 131.2 |
| D1.1_ctg10420    | 3D | 132.2 |
| D1.1_ctg620      | 3D | 132.2 |
| Xbcd22a          | 3D | 132.2 |
| Xgbx3864         | 3D | 132.2 |
| D1.1_ctg5319     | 3D | 133.2 |
| D1.1_ctg8783     | 3D | 133.2 |
| Xbcd1555a        | 3D | 133.2 |
| Xbcd372B         | 3D | 133.2 |
| Xgpw1251b        | 3D | 133.2 |
| D1.1_ctg1235     | 3D | 134.2 |
| Xbcd515          | 3D | 134.2 |
| D1.1_ctg13757    | 3D | 135.2 |
| Xfba027          | 3D | 135.2 |
| XksuD19          | 3D | 135.2 |
| Xcfd213a         | 3D | 137.2 |
| Xgwm3            | 3D | 137.2 |
| Xwmc549          | 3D | 137.3 |
| D1.1_ctg551      | 3D | 139.8 |
| D1.1_ctg9079     | 3D | 139.8 |
| XksuH15          | 3D | 139.8 |
| Xwg110           | 3D | 139.8 |
| Xcfd211          | 3D | 141.8 |
| Xgwm3b           | 3D | 141.8 |
| D1.1_ctg787_3    | 3D | 142.8 |
| Xcdo549c         | 3D | 142.8 |
| Xcfd219b         | 3D | 143.8 |
| Xgpw1062         | 3D | 143.8 |
| D1.1_ctg5041     | 3D | 144.8 |

|              |    |       |
|--------------|----|-------|
| Xgpw1149     | 3D | 144.8 |
| XksuG59      | 3D | 144.8 |
| Xfbb117a     | 3D | 145.8 |
| Xwmc552      | 3D | 146.8 |
| Xfba310c     | 3D | 147.8 |
| Xbcd361      | 3D | 148.8 |
| H26          | 3D | 149.8 |
| Xabc174b     | 3D | 149.8 |
| Xgwm4b       | 3D | 149.8 |
| Xpsr904      | 3D | 149.8 |
| D1.1_ctg9019 | 3D | 150.8 |
| H32          | 3D | 150.8 |
| XksuE14a     | 3D | 150.8 |
| Xbarc270     | 3D | 151.8 |
| Xcnl2b       | 3D | 151.8 |
| D1.1_ctg3726 | 3D | 152.8 |
| D1.1_ctg5172 | 3D | 152.8 |
| D1.1_ctg5195 | 3D | 152.8 |
| Xfba27       | 3D | 152.8 |
| Xfba389      | 3D | 152.8 |
| Xfbb147e     | 3D | 152.8 |
| Xfbb269      | 3D | 152.8 |
| Xfbb316a     | 3D | 152.8 |
| Xbarc323     | 3D | 155.8 |
| Sr24         | 3D | 156.8 |
| Xabc172a     | 3D | 156.8 |
| Xcnl4.2      | 3D | 156.8 |
| Xfbb293      | 3D | 156.8 |
| Xgpw307      | 3D | 156.8 |
| Xmwg12       | 3D | 157.8 |
| Xfbb237b     | 3D | 158.8 |
| Xgwm114b     | 3D | 158.8 |
| Xcdo482      | 3D | 160.8 |
| Xmwg11b      | 3D | 160.8 |
| Xbcd451      | 3D | 162.8 |
| Xgdm72       | 3D | 183.9 |
| Xbarc71      | 3D | 223.8 |
| Xwmc179      | 4A | 0     |
| XS13M59(390) | 4A | 5.3   |
| Xpsp3028     | 4A | 6     |
| P34/M50-5    | 4A | 7     |
| Xfbb1        | 4A | 7     |
| Xfba40a      | 4A | 10    |
| Xfba78a      | 4A | 12    |
| P40/M49-3    | 4A | 13    |

|            |    |      |
|------------|----|------|
| Xmgb299    | 4A | 13.7 |
| Xgwm4      | 4A | 15   |
| Xpsr39     | 4A | 16.6 |
| Xwmc516    | 4A | 19.2 |
| P35/M57-2  | 4A | 19.2 |
| Xbcd1738a  | 4A | 19.2 |
| M21/P76.4  | 4A | 20.2 |
| Xmwg58     | 4A | 20.2 |
| M77/P64.6a | 4A | 21.2 |
| Xbcd1652   | 4A | 21.2 |
| Xcdo959.1  | 4A | 21.2 |
| XksuF8a    | 4A | 21.2 |
| Ba2        | 4A | 22.2 |
| Xcdo1387   | 4A | 22.2 |
| Xgwm165    | 4A | 23.2 |
| Xpsr927.2  | 4A | 23.2 |
| Xrz574     | 4A | 24.2 |
| Xbarc206   | 4A | 24.3 |
| Xdupw238   | 4A | 24.7 |
| Xbarc138   | 4A | 25   |
| Xbarc106   | 4A | 25.2 |
| Xfbb332    | 4A | 25.2 |
| Xfba147    | 4A | 27.2 |
| Xwmc420    | 4A | 27.3 |
| Xfba320    | 4A | 28.9 |
| Xgwm30     | 4A | 28.9 |
| Xfba211a   | 4A | 29.9 |
| Xfba359    | 4A | 29.9 |
| Xwg464     | 4A | 29.9 |
| Xfba43     | 4A | 31.9 |
| Xgpw2283   | 4A | 32.9 |
| XgbxR247   | 4A | 35.9 |
| Xbcd8a     | 4A | 36.9 |
| Xgwm610a   | 4A | 37.9 |
| Xgpw2302   | 4A | 38.9 |
| Xfbb176    | 4A | 39.9 |
| Xfbb227    | 4A | 39.9 |
| Xwmc89     | 4A | 40.9 |
| Xwmc491    | 4A | 41.2 |
| Xwmc680    | 4A | 41.2 |
| Xwmc48     | 4A | 41.4 |
| Xcfd71     | 4A | 42   |
| Xgpw1010   | 4A | 42   |
| wPt-7524   | 4A | 42   |
| Xwmc173    | 4A | 42.2 |

|               |    |      |
|---------------|----|------|
| Xgwm601       | 4A | 42.6 |
| Xgwm48        | 4A | 42.8 |
| Xwmc15        | 4A | 42.8 |
| Xwmc446       | 4A | 42.8 |
| Xgwm44        | 4A | 44.7 |
| Xcfa2256      | 4A | 44.8 |
| Xbgl1485(Ger) | 4A | 44.9 |
| XvutPDI       | 4A | 44.9 |
| Xwmc757       | 4A | 45.1 |
| Xmgb7         | 4A | 45.7 |
| Xwmc96        | 4A | 48.2 |
| Xwg876        | 4A | 48.5 |
| Xgwm610       | 4A | 51.3 |
| Xwmc617       | 4A | 53.5 |
| Xgwm192       | 4A | 63.5 |
| Xgwm464       | 4A | 63.5 |
| Xfba307       | 4A | 65.2 |
| Xbcd808       | 4A | 67.1 |
| Xgpw2140      | 4A | 67.1 |
| Xgpw2166      | 4A | 67.1 |
| Xabg484       | 4A | 68.1 |
| Xbcd1738      | 4A | 68.1 |
| XksuH9a       | 4A | 69   |
| Xfba40b       | 4A | 70   |
| Xfba78b       | 4A | 71   |
| Xpsr593.2     | 4A | 73   |
| Xgwm4b        | 4A | 75   |
| Xfba147b      | 4A | 77   |
| Xgpw2122      | 4A | 77   |
| Xfba211b      | 4A | 78   |
| Xmwg634.2     | 4A | 78   |
| Xwg622        | 4A | 80   |
| Xbcd402       | 4A | 81   |
| Xgwm397       | 4A | 81   |
| wPt-8489      | 4A | 82.3 |
| P41/M60-3     | 4A | 82.5 |
| XWD004da      | 4A | 82.5 |
| Xbcd8         | 4A | 82.5 |
| Xgpw2138      | 4A | 82.5 |
| Xbcd873       | 4A | 84.5 |
| Xfba65        | 4A | 84.5 |
| wPt-5455      | 4A | 85.2 |
| P32/M59-9     | 4A | 85.5 |
| Xgpw2279      | 4A | 85.5 |
| P35/M47-15    | 4A | 86.5 |

|                  |    |       |
|------------------|----|-------|
| P36/M49-9        | 4A | 86.5  |
| Xcdo948          | 4A | 86.5  |
| Xpsr1327         | 4A | 87.3  |
| P36/M47-3        | 4A | 87.5  |
| Xgwm269.2        | 4A | 87.5  |
| rPt-8568         | 4A | 87.9  |
| wPt-3638         | 4A | 88    |
| Phs1             | 4A | 88.4  |
| Xgwm622          | 4A | 89.1  |
| XksuG12          | 4A | 89.4  |
| P34/M58-2        | 4A | 90.4  |
| Xag12b           | 4A | 90.4  |
| Xfbb278          | 4A | 90.4  |
| CA499463         | 4A | 90.7  |
| Xdupw190         | 4A | 90.8  |
| Xglk752          | 4A | 91.3  |
| wPt-8479         | 4A | 92    |
| Xglk315          | 4A | 92.3  |
| Xgwm397b         | 4A | 92.3  |
| wPt-6303         | 4A | 92.3  |
| wPt-2788         | 4A | 93.1  |
| Xpsr59a          | 4A | 93.3  |
| Xpsr914          | 4A | 94.3  |
| Xwmc513          | 4A | 94.3  |
| Xcsl102(NBS-LRR) | 4A | 95.3  |
| Xglk331          | 4A | 96.3  |
| Xgwm111          | 4A | 96.3  |
| Xmgb12           | 4A | 98.5  |
| Xglk600b         | 4A | 99.5  |
| XksuE3           | 4A | 99.5  |
| Xpsr934          | 4A | 99.5  |
| Xglk370          | 4A | 100.5 |
| Xgwm894          | 4A | 101.4 |
| Xgwm937          | 4A | 102   |
| Xpsp1316         | 4A | 102.5 |
| Xpsr1316         | 4A | 102.7 |
| Xdupw4           | 4A | 103.4 |
| Xwmc650          | 4A | 104.4 |
| Xbcd130a         | 4A | 104.7 |
| Xglk354          | 4A | 104.7 |
| Xgpw2244         | 4A | 105.7 |
| Xabg390          | 4A | 107.7 |
| Xcdo506          | 4A | 107.7 |
| wPt-2221         | 4A | 108.2 |
| Xgwm265          | 4A | 111   |



|              |    |       |
|--------------|----|-------|
| Xbarc170     | 4A | 112.8 |
| Xutv1343b    | 4A | 113.1 |
| wPt-4660     | 4A | 114.1 |
| Xutv434      | 4A | 115.4 |
| wPt-1357     | 4A | 115.8 |
| Xwmc468      | 4A | 120.5 |
| Xwmc258      | 4A | 121.7 |
| Xgwm1081     | 4A | 126   |
| Xglk128      | 4A | 126.1 |
| Xgwm637      | 4A | 126.4 |
| Xmwg710a     | 4A | 127.8 |
| Xpsr115      | 4A | 131   |
| Xgwm118      | 4A | 131.4 |
| XS25M49(350) | 4A | 136.4 |
| wPt-9169     | 4A | 137.8 |
| wPt-6515     | 4A | 138   |
| Xwmc707      | 4A | 138.4 |
| wPt-0162     | 4A | 138.7 |
| wPt-0817     | 4A | 140.5 |
| wPt-6330     | 4A | 141.4 |
| Xwmc161      | 4A | 146.6 |
| Xwmc161a     | 4A | 147.7 |
| Xgwm565      | 4A | 149.5 |
| Xgpw2228     | 4A | 149.7 |
| Xgpw2331     | 4A | 149.7 |
| Xmwg549.1    | 4A | 149.7 |
| Xutv1343a    | 4A | 149.9 |
| Xgwm494      | 4A | 152.1 |
| Xcfd257      | 4A | 154.3 |
| wPt-2247     | 4A | 154.5 |
| Xpsr580a     | 4A | 159.3 |
| XgbxG557     | 4A | 160.1 |
| wPt-2542     | 4A | 160.7 |
| wPt-3239     | 4A | 161.1 |
| wPt-5249     | 4A | 161.4 |
| wPt-7289     | 4A | 161.4 |
| wPt-1091     | 4A | 162   |
| wPt-6728     | 4A | 162.9 |
| wPt-5428     | 4A | 163.7 |
| wPt-5857     | 4A | 163.8 |
| wPt-3810     | 4A | 164.5 |
| Xwmc718      | 4A | 165.1 |
| Xbcd1670     | 4A | 165.5 |
| Xfba4a       | 4A | 165.5 |
| Xgwm162      | 4A | 165.5 |

|               |    |       |
|---------------|----|-------|
| wPt-7939      | 4A | 166   |
| Xmwg710.1     | 4A | 166.4 |
| wPt-1262      | 4A | 166.7 |
| wPt-7558      | 4A | 166.8 |
| wPt-1550      | 4A | 167.2 |
| Xwmc760       | 4A | 167.3 |
| Xwmc597       | 4A | 167.4 |
| wPt-7926      | 4A | 167.4 |
| Xak466.2(Nra) | 4A | 167.5 |
| Xcdo780a      | 4A | 167.5 |
| Xgwm834       | 4A | 167.5 |
| XgbxG036      | 4A | 167.8 |
| Xwg232.7      | 4A | 168.4 |
| wPt-3655      | 4A | 169   |
| Xpsr115.1     | 4A | 169.3 |
| P78/M59.6     | 4A | 170.3 |
| P36/M54-1     | 4A | 171.3 |
| Xpsr115.2     | 4A | 171.3 |
| Xcfd88        | 4A | 172.3 |
| Xgwm350.2     | 4A | 172.3 |
| wPt-6997      | 4A | 173   |
| wPt-1701      | 4A | 173.1 |
| Xgwm274       | 4A | 173.3 |
| XgbxG542      | 4A | 173.7 |
| Xwmc262       | 4A | 174.1 |
| wPt-2345      | 4A | 176.2 |
| wPt-9728      | 4A | 176.2 |
| Xwmc698       | 4A | 177.5 |
| XksuD9        | 4A | 178   |
| wPt-2129      | 4A | 178.3 |
| Xcdo475       | 4A | 179.9 |
| Xbarc343      | 4A | 180.7 |
| wPt-3766      | 4A | 182.5 |
| Xbcd130       | 4A | 182.6 |
| P35/M54-9     | 4A | 183.1 |
| P36/M53-338   | 4A | 183.1 |
| P42/M51-76    | 4A | 183.1 |
| Xfba231       | 4A | 183.1 |
| wPt-7280      | 4A | 183.2 |
| wPt-5749      | 4A | 183.6 |
| wPt-9833      | 4A | 183.7 |
| wPt-0105      | 4A | 184   |
| wPt-5825      | 4A | 184   |
| Xbcd135a      | 4A | 185.2 |
| Xpsr470(Wx)   | 4A | 185.2 |

|                |    |       |
|----------------|----|-------|
| Xwmc2          | 4A | 185.2 |
| Xwmc283        | 4A | 185.2 |
| XgbxG035b      | 4A | 186.2 |
| wPt-5543       | 4A | 187.4 |
| wPt-4596       | 4A | 188.7 |
| P40/M60-221    | 4A | 188.8 |
| QMat.crc-4A    | 4A | 188.8 |
| Xfbb154        | 4A | 188.8 |
| P34/M48-2      | 4A | 189.8 |
| P40/M47-1      | 4A | 189.8 |
| P41/M61-4      | 4A | 189.8 |
| Xbcd135b       | 4A | 189.8 |
| Xfbb114a       | 4A | 189.8 |
| P34/M50-12     | 4A | 190.8 |
| XgbxR221       | 4A | 190.8 |
| Xgbx3480a      | 4A | 191.8 |
| M60/P64.10     | 4A | 192.8 |
| M67/P77.6      | 4A | 192.8 |
| XksuE3b        | 4A | 192.8 |
| P38/M47-7      | 4A | 193.8 |
| P41/M47-11     | 4A | 193.8 |
| wPt-1961       | 4A | 194.7 |
| wPt-8000       | 4A | 194.7 |
| P34/M51-90     | 4A | 194.7 |
| P36/M48-3      | 4A | 194.7 |
| Xabc465b       | 4A | 194.7 |
| Xcdo665C       | 4A | 194.7 |
| XgbxG141       | 4A | 194.7 |
| Xgpw356        | 4A | 194.7 |
| P31/M52-4      | 4A | 195.7 |
| P41/M47-12     | 4A | 195.7 |
| Xpsr490.2(Ss1) | 4A | 195.7 |
| wPt-3061       | 4A | 196   |
| P31/M49-2      | 4A | 196.7 |
| P33/M49-8      | 4A | 196.7 |
| P78/M49.6      | 4A | 196.7 |
| TC85050        | 4A | 197.1 |
| M51/P65.6      | 4A | 197.6 |
| M60/P64.1      | 4A | 197.6 |
| P35/M61-5      | 4A | 197.6 |
| Xpsp3119       | 4A | 197.6 |
| P31/M57-1      | 4A | 198.6 |
| P39/M49-189    | 4A | 198.6 |
| P41/M51-157    | 4A | 198.6 |
| XWB078d        | 4A | 198.6 |

|           |    |       |
|-----------|----|-------|
| Xwmc500   | 4A | 198.6 |
| Xcdo545   | 4A | 198.7 |
| Xgwm959   | 4A | 199.6 |
| wPt-7491a | 4A | 200.1 |
| Xmag3886  | 4A | 200.5 |
| wPt-7168  | 4A | 201   |
| wPt-5003a | 4A | 201.1 |
| wPt-3796  | 4A | 201.3 |
| wPt-2780  | 4A | 201.5 |
| Xmag974   | 4A | 201.6 |
| wPt-6440a | 4A | 201.7 |
| wPt-2331  | 4A | 201.9 |
| wPt-9196  | 4A | 201.9 |
| Xwmc232   | 4A | 202   |
| wPt-8144  | 4A | 202   |
| wPt-9162  | 4A | 202   |
| wPt-1743  | 4A | 202.1 |
| wPt-2122  | 4A | 202.1 |
| Xgpw7056  | 4A | 202.3 |
| wPt-3150  | 4A | 202.4 |
| wPt-5735  | 4A | 202.4 |
| wPt-0538  | 4A | 202.5 |
| wPt-6502  | 4A | 202.9 |
| wPt-9183  | 4A | 202.9 |
| wPt-7821  | 4A | 203.3 |
| wPt-2909  | 4A | 204.2 |
| wPt-2006  | 4A | 205.4 |
| wPt-2301  | 4A | 205.5 |
| wPt-3108  | 4A | 205.5 |
| wPt-8167a | 4A | 205.5 |
| wPt-8886b | 4A | 205.5 |
| wPt-3349  | 4A | 205.6 |
| wPt-2084  | 4A | 205.8 |
| wPt-3795  | 4A | 206.1 |
| wPt-7807  | 4A | 206.4 |
| wPt-8886  | 4A | 207.1 |
| wPt-5003b | 4A | 207.5 |
| wPt-6440b | 4A | 207.5 |
| wPt-6404  | 4A | 207.7 |
| wPt-2794a | 4A | 207.8 |
| wPt-1155a | 4A | 208   |
| wPt-4241  | 4A | 208.1 |
| wPt-2291  | 4A | 208.3 |
| Xcfd30    | 4A | 208.8 |
| wPt-3449  | 4A | 208.9 |

|             |    |       |
|-------------|----|-------|
| wPt-2983    | 4A | 209.1 |
| wPt-8167b   | 4A | 209.1 |
| wPt-2794b   | 4A | 209.9 |
| wPt-7354    | 4A | 210.2 |
| wPt-8271    | 4A | 210.3 |
| wPt-3095    | 4A | 211.2 |
| wPt-7104    | 4A | 211.3 |
| wPt-5099    | 4A | 211.9 |
| Xbarc70     | 4A | 212.2 |
| Xbarc78     | 4A | 212.5 |
| wPt-5172    | 4A | 213   |
| P42/M47-1   | 4A | 214.9 |
| Xcdo545.2   | 4A | 214.9 |
| wPt-9305    | 4A | 215   |
| P33/M49-6   | 4A | 216.2 |
| P35/M47-2   | 4A | 216.2 |
| P40/M55-6   | 4A | 216.2 |
| P40/M60-307 | 4A | 216.2 |
| XgpwE4      | 4A | 216.2 |
| Xpsr119b    | 4A | 216.2 |
| wPt-1362    | 4A | 216.2 |
| GBSS        | 4A | 217.2 |
| wPt-3506    | 4A | 217.5 |
| wPt-3491    | 4A | 218.9 |
| wPt-4487a   | 4A | 219.4 |
| P36/M47-1   | 4A | 220.2 |
| P41/M60-1   | 4A | 220.2 |
| Xtam72d     | 4A | 220.2 |
| Xgwm160     | 4A | 220.2 |
| wPt-4680    | 4A | 220.2 |
| wPt-0610    | 4A | 221.4 |
| wPt-5055    | 4A | 221.5 |
| wPt-0798    | 4A | 221.8 |
| wPt-1155b   | 4A | 221.8 |
| wPt-1520    | 4A | 221.8 |
| wPt-4424    | 4A | 221.8 |
| wPt-5112    | 4A | 222   |
| wPt-4620a   | 4A | 222.4 |
| wPt-0833a   | 4A | 222.5 |
| wPt-5434    | 4A | 222.5 |
| wPt-9150    | 4A | 222.5 |
| wPt-9954    | 4A | 222.5 |
| wPt-0992a   | 4A | 222.6 |
| wPt-3876    | 4A | 222.7 |
| Xmag1140    | 4A | 222.8 |

|             |    |       |
|-------------|----|-------|
| Xmag3733    | 4A | 222.8 |
| wPt-3859    | 4A | 222.9 |
| wPt-2836    | 4A | 223.2 |
| wPt-1007    | 4A | 223.3 |
| wPt-3729    | 4A | 223.3 |
| wPt-2533    | 4A | 223.4 |
| F84         | 4A | 223.7 |
| Xwmc104     | 4A | 224.1 |
| wPt-0601    | 4A | 224.3 |
| Xcfd2       | 4A | 224.4 |
| wPt-9598a   | 4A | 224.6 |
| wPt-6757    | 4A | 224.7 |
| wPt-7405    | 4A | 225   |
| wPt-8091    | 4A | 225   |
| wPt-9103a   | 4A | 225   |
| wPt-0032    | 4A | 225.3 |
| wPt-2951    | 4A | 225.3 |
| wPt-3389    | 4A | 225.3 |
| wPt-5260    | 4A | 225.3 |
| wPt-0763    | 4A | 225.8 |
| wPt-6176    | 4A | 225.8 |
| wPt-7981    | 4A | 225.8 |
| rPt-0238    | 4A | 226.3 |
| wPt-0150    | 4A | 226.3 |
| wPt-5354    | 4A | 226.3 |
| wPt-6688    | 4A | 226.3 |
| Xwmc776     | 4A | 226.5 |
| wPt-6603    | 4A | 227   |
| wPt-9418    | 4A | 227.2 |
| wPt-8657    | 4A | 227.5 |
| P31/M58-1   | 4A | 227.8 |
| P32/M48-2   | 4A | 227.8 |
| P40/M61-7   | 4A | 227.8 |
| P78/M92.8   | 4A | 227.8 |
| Xbcd130b    | 4A | 227.8 |
| Xpsr160     | 4A | 227.8 |
| wPt-7919    | 4A | 227.8 |
| Xpsr392     | 4A | 227.8 |
| P32/M48-228 | 4A | 228.8 |
| P32/M48-4   | 4A | 228.8 |
| P32/M62-2   | 4A | 228.8 |
| P33/M55-1   | 4A | 228.8 |
| P35/M54-3   | 4A | 228.8 |
| Xabg378b    | 4A | 228.8 |
| Xabg704b    | 4A | 228.8 |

|             |    |       |
|-------------|----|-------|
| Xpsr160a    | 4A | 228.8 |
| Xfbb194     | 4A | 228.8 |
| P31/M53-4   | 4A | 229.8 |
| P31/M60-3   | 4A | 229.8 |
| P33/M54-1   | 4A | 229.8 |
| P41/M47-8   | 4A | 229.8 |
| P33/M60-3   | 4A | 230.8 |
| Xfba282     | 4A | 230.8 |
| Xbcd1285    | 4A | 232.8 |
| Xpsr573     | 4A | 232.8 |
| wPt-9675    | 4A | 234.5 |
| P78/M68.y   | 4A | 234.6 |
| wPt-2151    | 4A | 234.8 |
| Xgbx3832b   | 4A | 235.4 |
| Xfbb114b    | 4A | 236.4 |
| P78/M68.x   | 4A | 237.4 |
| Xwmc313     | 4A | 238.4 |
| wPt-4064    | 4A | 239.1 |
| wPt-9059    | 4A | 239.3 |
| wPt-11389   | 4A | 239.9 |
| Xwmc722     | 4A | 240.6 |
| wPt-5489    | 4A | 241.5 |
| Stb12       | 4A | 242.4 |
| Stb7        | 4A | 242.4 |
| Xwmc219     | 4A | 242.4 |
| Xwmc497     | 4A | 243.4 |
| M65/P64.7   | 4A | 244.4 |
| Xpsr160.1   | 4A | 244.4 |
| XksuD9b     | 4A | 245.4 |
| wPt-1482a   | 4A | 245.4 |
| Xgwm350     | 4A | 249.5 |
| Xbarc327    | 4A | 254.4 |
| Xbcd1975    | 4A | 254.4 |
| wPt-9342    | 4A | 258.4 |
| Xpsr392.1   | 4A | 260.4 |
| Xfba243     | 4A | 261.4 |
| BQ169752    | 4A | 263.3 |
| QHt.inra-4A | 4A | 263.4 |
| Xbarc52     | 4A | 264.4 |
| Xcdo780b    | 4A | 268.4 |
| Xbarc315    | 4A | 272.4 |
| Xbarc184    | 4A | 278.4 |
| Xbcd129     | 4A | 283.4 |
| Xbarc153    | 4A | 297.4 |
| Xbcd588     | 4A | 303.4 |

|           |    |       |
|-----------|----|-------|
| Xfba253   | 4A | 306.4 |
| wPt-9824  | 4B | 0     |
| wPt-0246  | 4B | 6     |
| wPt-4699a | 4B | 6     |
| wPt-9118  | 4B | 6.3   |
| wPt-8650a | 4B | 7.8   |
| wPt-6869c | 4B | 9.3   |
| wPt-1046  | 4B | 9.7   |
| wPt-5559  | 4B | 9.7   |
| wPt-1272  | 4B | 11.9  |
| wPt-1931  | 4B | 40.9  |
| P36M50b   | 4B | 59.8  |
| wPt-1708  | 4B | 93.8  |
| wPt-3908  | 4B | 95.2  |
| Xbarc10   | 4B | 96    |
| wPt-0608  | 4B | 98.1  |
| Xfba177a  | 4B | 99.6  |
| Xbarc68   | 4B | 100.2 |
| Xgwm664   | 4B | 100.5 |
| Xwmc679   | 4B | 100.5 |
| wPt-11203 | 4B | 100.5 |
| wPt-4537  | 4B | 100.5 |
| Xbcd402A  | 4B | 100.6 |
| Xblt801   | 4B | 100.6 |
| Xwmc652   | 4B | 100.8 |
| P34/M47-5 | 4B | 102.6 |
| Xfbb255a  | 4B | 102.6 |
| Xbarc193  | 4B | 102.6 |
| Xfbb67a   | 4B | 103.6 |
| Xwmc692   | 4B | 103.8 |
| tPt-5519  | 4B | 103.8 |
| wPt-9393  | 4B | 103.8 |
| TC80528b  | 4B | 103.9 |
| wPt-7365  | 4B | 103.9 |
| Xcfd39    | 4B | 104.1 |
| TC67416   | 4B | 104.8 |
| Xwmc617   | 4B | 104.8 |
| wPt-6149  | 4B | 105.2 |
| Xbcd446a  | 4B | 105.6 |
| Xgwm193   | 4B | 105.6 |
| wPt-3101  | 4B | 106.1 |
| Xfbb22a   | 4B | 106.5 |
| Xmwg2025a | 4B | 107.5 |
| XgbxG260  | 4B | 108.5 |
| Xfba78a   | 4B | 109.5 |



|             |    |       |
|-------------|----|-------|
| Xfbb24a     | 4B | 109.5 |
| Xgwm112     | 4B | 109.5 |
| Xwmc657     | 4B | 109.5 |
| Xgwm165     | 4B | 109.5 |
| XgbxG192c   | 4B | 112.5 |
| Xcdo795     | 4B | 113.5 |
| Xpsp3163    | 4B | 113.5 |
| Xbcd1250    | 4B | 116.5 |
| Xbarc292    | 4B | 117.5 |
| XgbxG057    | 4B | 117.5 |
| Xgwm925     | 4B | 117.6 |
| Xgwm608     | 4B | 117.8 |
| Xcdo1128    | 4B | 118.3 |
| Xgwm856     | 4B | 118.3 |
| Xgwm898     | 4B | 118.3 |
| Xbarc25     | 4B | 118.4 |
| Xwmc238     | 4B | 118.4 |
| Xbcd1262    | 4B | 119   |
| wPt-8892    | 4B | 119.1 |
| wPt-6123    | 4B | 119.2 |
| Xbcd2026    | 4B | 119.8 |
| Xbcd749     | 4B | 119.8 |
| Xcdo938     | 4B | 119.8 |
| Xfba8       | 4B | 119.8 |
| Xfbb121     | 4B | 119.8 |
| Xabg484     | 4B | 120.8 |
| Xmtd13      | 4B | 120.8 |
| Xwg110.2    | 4B | 120.8 |
| Xcsu25      | 4B | 121.8 |
| Xgpw1108b   | 4B | 121.8 |
| Xgpw1201a   | 4B | 121.8 |
| Xgpw2271b   | 4B | 121.8 |
| Xrz251      | 4B | 121.8 |
| Rht1        | 4B | 121.8 |
| Xrz672      | 4B | 123.1 |
| Xwmc826     | 4B | 123.1 |
| Xfba147     | 4B | 124   |
| Xcfa2091    | 4B | 125   |
| P31/M57-6   | 4B | 126   |
| P32/M53-3   | 4B | 126   |
| P32/M59-10  | 4B | 126   |
| P33/M54-4   | 4B | 126   |
| P40/M55-9   | 4B | 126   |
| P40/M60-126 | 4B | 126   |
| P44/M68-160 | 4B | 126   |

|               |    |       |
|---------------|----|-------|
| Xbcd1051      | 4B | 126   |
| Xwmc48        | 4B | 127   |
| P38/M54-4     | 4B | 127.1 |
| Rht           | 4B | 127.1 |
| Rht-B1        | 4B | 127.1 |
| Xgwm1007      | 4B | 127.1 |
| Xgwm888       | 4B | 127.1 |
| Xwmc206.3     | 4B | 127.1 |
| Xcdo669b      | 4B | 127.1 |
| Xwmc491       | 4B | 127.1 |
| Xwmc511       | 4B | 127.1 |
| Xcfd2         | 4B | 127.1 |
| Xdupw23       | 4B | 127.1 |
| Xutv1386      | 4B | 127.1 |
| Xwmc206       | 4B | 127.1 |
| tPt-0602      | 4B | 127.1 |
| wPt-5497      | 4B | 127.1 |
| wPt-7392      | 4B | 127.1 |
| Xgwm495       | 4B | 127.1 |
| Xwmc89        | 4B | 127.1 |
| Xwmc254       | 4B | 127.6 |
| Xgwm107       | 4B | 128.4 |
| Xwmc419       | 4B | 128.7 |
| Xwmc695       | 4B | 128.7 |
| Xgwm113       | 4B | 128.8 |
| Xwmc16        | 4B | 128.8 |
| Xgwm66        | 4B | 129.5 |
| Xbcd1265      | 4B | 130.5 |
| Xbcd402B      | 4B | 130.5 |
| Xfba1         | 4B | 130.5 |
| Xfbb24b       | 4B | 130.5 |
| XE5M5m        | 4B | 131.5 |
| Xgwm495b      | 4B | 131.5 |
| CA694714      | 4B | 131.7 |
| Xgwm710       | 4B | 131.7 |
| Xgwm162.2     | 4B | 132.4 |
| QPhs.ocs-4B.1 | 4B | 133.4 |
| Xfba78b       | 4B | 133.4 |
| Xgwm368       | 4B | 134.4 |
| Xgwm540       | 4B | 134.4 |
| wPt-0872      | 4B | 134.4 |
| wPt-4931      | 4B | 134.6 |
| Xbarc20       | 4B | 134.7 |
| Xbcd110       | 4B | 134.9 |
| Xcfd283b      | 4B | 135   |

|              |    |       |
|--------------|----|-------|
| Xmgb343      | 4B | 135   |
| Gai1         | 4B | 135.2 |
| Xpsr622      | 4B | 135.3 |
| XS25M49(365) | 4B | 135.5 |
| XS13M59(450) | 4B | 135.7 |
| CA663888     | 4B | 135.9 |
| XS13M60(360) | 4B | 136.4 |
| Xwmc546      | 4B | 136.4 |
| BF484674-297 | 4B | 137   |
| Xgwm513      | 4B | 137.5 |
| Xfbb22b      | 4B | 139   |
| Xpsp3078     | 4B | 139   |
| Xgwm192      | 4B | 139   |
| M62/P64.4    | 4B | 140   |
| XksuC2       | 4B | 140   |
| Xwg282       | 4B | 140   |
| Xcfd283      | 4B | 140.5 |
| Xcdo1401     | 4B | 141   |
| XS13M61(170) | 4B | 141.2 |
| Xgwm1084     | 4B | 141.5 |
| wPt-1505a    | 4B | 141.5 |
| Xgwm149      | 4B | 141.7 |
| Xcni7.2      | 4B | 142.7 |
| Xfba41       | 4B | 142.7 |
| XksuG10      | 4B | 142.7 |
| Xpsp3030.2   | 4B | 142.7 |
| Xfbb178      | 4B | 143.7 |
| Xmwg2025b    | 4B | 143.7 |
| Xgwm375      | 4B | 143.7 |
| Xfbb58       | 4B | 144.7 |
| Xcdo1312     | 4B | 145.7 |
| Xgwm513b     | 4B | 145.7 |
| XksuE2       | 4B | 145.7 |
| Xcfd22       | 4B | 146.7 |
| wPt-7062     | 4B | 147.1 |
| Xgwm251      | 4B | 147.7 |
| wPt-6209     | 4B | 147.8 |
| wPt-4870     | 4B | 148.1 |
| Xwmc710      | 4B | 148.3 |
| wPt-7412     | 4B | 148.4 |
| Xwmc310      | 4B | 148.5 |
| Xbarc163     | 4B | 149.8 |
| Xcdo20.1     | 4B | 150.3 |
| Xfbb182      | 4B | 151.3 |
| Xgwm6a       | 4B | 151.3 |

|                 |    |       |
|-----------------|----|-------|
| Xgwm930         | 4B | 151.4 |
| wPt-3991        | 4B | 151.5 |
| wPt-8107        | 4B | 151.6 |
| wPt-11493       | 4B | 152.1 |
| wPt-3255        | 4B | 152.1 |
| wPt-9223        | 4B | 152.1 |
| wPt-7858        | 4B | 152.2 |
| Xwmc349         | 4B | 152.7 |
| Xwg114.1        | 4B | 152.8 |
| Xwmc413         | 4B | 153.7 |
| Xbarc60         | 4B | 154.8 |
| Xgwm165b        | 4B | 154.8 |
| Xbarc109        | 4B | 157.9 |
| Xwmc47          | 4B | 160.8 |
| Xgwm538         | 4B | 161.3 |
| P40/M54-2       | 4B | 164.3 |
| P41/M51-299     | 4B | 165.3 |
| Xwmc125         | 4B | 167.3 |
| Xwb163k         | 4B | 168.3 |
| XWB060k         | 4B | 170.3 |
| Xfbb67b         | 4B | 172.3 |
| Xfbb255b        | 4B | 175.3 |
| wPt-0391        | 4B | 179.3 |
| Xgwm6b          | 4B | 180.3 |
| Xfba177b        | 4B | 183.3 |
| Xbcd402c        | 4B | 188.3 |
| wPt-5564        | 4B | 189.8 |
| wPt-8292        | 4B | 191.3 |
| wPt-3804        | 4B | 191.5 |
| wPt-5996        | 4B | 191.5 |
| Xpsr375.4       | 4B | 194.3 |
| Xdupw43         | 4B | 198.7 |
| M65/P64.8       | 4B | 200.3 |
| XWD043k         | 4B | 204.3 |
| Xwmc617         | 4D | 0     |
| D1.1_ctg11889_1 | 4D | 10    |
| D1.1_ctg5162_1  | 4D | 10    |
| D1.1_ctg5357_1  | 4D | 10    |
| D1.1_ctg5368_1  | 4D | 10    |
| Xbcd265a        | 4D | 10    |
| Xwmc285         | 4D | 10    |
| Xbcd1889        | 4D | 11    |
| Xfbb3           | 4D | 13    |
| Xgpw2046a       | 4D | 13    |
| Rht2            | 4D | 13.8  |

|                |    |      |
|----------------|----|------|
| Xgpw2066       | 4D | 13.9 |
| Xgpw2180       | 4D | 17.9 |
| D1.1_ctg1648   | 4D | 19.9 |
| D1.1_ctg2680   | 4D | 19.9 |
| Xbcd1930b      | 4D | 19.9 |
| D1.1_ctg5162_2 | 4D | 21.9 |
| D1.1_ctg5357_2 | 4D | 21.9 |
| D1.1_ctg5368_2 | 4D | 21.9 |
| D1.1_ctg7063   | 4D | 21.9 |
| Xbcd808B       | 4D | 21.9 |
| Xgwm888        | 4D | 22.9 |
| D1.1_ctg5649   | 4D | 23.9 |
| XksuE3c        | 4D | 23.9 |
| D1.1_ctg2905   | 4D | 27.9 |
| D1.1_ctg7196   | 4D | 27.9 |
| XksuH9         | 4D | 27.9 |
| Xwmc574        | 4D | 29.2 |
| Xwmc818        | 4D | 29.3 |
| D1.1_ctg2040   | 4D | 29.9 |
| D1.1_ctg6274   | 4D | 29.9 |
| Xmwg706        | 4D | 29.9 |
| Xmwg676b       | 4D | 30.9 |
| Xgwm497        | 4D | 33.9 |
| Xwmc89         | 4D | 36.9 |
| XksuH14        | 4D | 37.4 |
| Xwmc720        | 4D | 37.4 |
| Xwmc48         | 4D | 38.5 |
| Xcfd106        | 4D | 40.4 |
| Xcfd160        | 4D | 40.4 |
| Xgwm213        | 4D | 40.4 |
| Xgwm608        | 4D | 41.2 |
| Xwmc52         | 4D | 41.4 |
| Xbarc98        | 4D | 42.3 |
| Xcfd193        | 4D | 42.5 |
| Xbarc91        | 4D | 42.8 |
| Xwmc473        | 4D | 43.4 |
| Xgwm264        | 4D | 46.4 |
| XgbxG102       | 4D | 51.4 |
| Xgpw1209a      | 4D | 51.4 |
| Xmwg634        | 4D | 51.4 |
| Xcfd81b        | 4D | 54.4 |
| XgbxG081       | 4D | 54.4 |
| XgbxG129       | 4D | 54.4 |
| XgbxG152       | 4D | 54.4 |
| XgbxG192b      | 4D | 54.4 |

|                 |    |      |
|-----------------|----|------|
| XgbxG328        | 4D | 54.4 |
| Xgpw2271a       | 4D | 54.4 |
| Xgpw336         | 4D | 54.4 |
| Xgwm608a        | 4D | 54.4 |
| Xblt101.t7      | 4D | 55.4 |
| Xwmc419         | 4D | 55.4 |
| Rht-D1          | 4D | 57.4 |
| D1.1_ctg3738_1  | 4D | 58.4 |
| Xfbb251a        | 4D | 58.4 |
| Xcfd23          | 4D | 58.4 |
| Xgwm133         | 4D | 58.6 |
| Xcfd71          | 4D | 58.7 |
| Xwmc182         | 4D | 59.5 |
| Xwmc489         | 4D | 59.9 |
| Xgwm165a        | 4D | 60.6 |
| Xpsp3103        | 4D | 60.6 |
| Xwmc457         | 4D | 60.6 |
| Xcdo669         | 4D | 62.6 |
| Xbarc225        | 4D | 69.6 |
| Xfba211         | 4D | 69.6 |
| D1.1_ctg11889_2 | 4D | 71.6 |
| D1.1_ctg5162_3  | 4D | 71.6 |
| D1.1_ctg5357_3  | 4D | 71.6 |
| D1.1_ctg5368_3  | 4D | 71.6 |
| Xbcd265b        | 4D | 71.6 |
| Xbarc308        | 4D | 72.6 |
| Xwmc48b         | 4D | 72.6 |
| Alt2            | 4D | 73.6 |
| Xbarc217        | 4D | 74.6 |
| Xfbb13          | 4D | 74.6 |
| Xbarc288        | 4D | 76.6 |
| Xbcd327         | 4D | 77.6 |
| Xbarc334        | 4D | 78.6 |
| XksuF8.2        | 4D | 79.6 |
| D1.1_ctg3738_2  | 4D | 80.6 |
| Xfbb251b        | 4D | 80.6 |
| Xfbb336         | 4D | 81.6 |
| Xcfd89          | 4D | 82.6 |
| Xgwm192         | 4D | 82.6 |
| Xgwm193         | 4D | 82.6 |
| Xgpw342         | 4D | 85.2 |
| Xgwm165         | 4D | 85.2 |
| Xwmc33          | 4D | 90   |
| Xwmc331         | 4D | 90   |
| Xbcd1117        | 4D | 91.4 |

|                |    |       |
|----------------|----|-------|
| Xwmc206        | 4D | 92.4  |
| Xwmc399        | 4D | 92.5  |
| D1.1_ctg4222   | 4D | 94.5  |
| D1.1_ctg6238   | 4D | 94.5  |
| D1.1_ctg6392   | 4D | 94.5  |
| Xbcd15.1       | 4D | 94.5  |
| Xcfd39b        | 4D | 96.1  |
| Xfbb178a       | 4D | 96.5  |
| Xcfd39         | 4D | 97.5  |
| Xgpw311a       | 4D | 99.5  |
| XgpwE2         | 4D | 100.5 |
| AltBH          | 4D | 102.5 |
| D1.1_ctg9337_1 | 4D | 102.5 |
| Xcdo1312a      | 4D | 102.5 |
| D1.1_ctg6064_1 | 4D | 106.5 |
| D1.1_ctg8441_1 | 4D | 106.5 |
| Xbcd1431.1     | 4D | 106.5 |
| Xcfd84         | 4D | 106.5 |
| Xcdo1081       | 4D | 107.5 |
| Xwmc622        | 4D | 109   |
| D1.1_ctg3701   | 4D | 111.5 |
| D1.1_ctg4161   | 4D | 111.5 |
| Xmwg710a       | 4D | 111.5 |
| Xbarc200       | 4D | 113.2 |
| Xcfd54a        | 4D | 113.5 |
| Xbarc48.4      | 4D | 114.5 |
| D1.1_ctg10323  | 4D | 116.5 |
| D1.1_ctg10469  | 4D | 116.5 |
| D1.1_ctg18     | 4D | 116.5 |
| D1.1_ctg8730   | 4D | 116.5 |
| D1.1_ctg9093   | 4D | 116.5 |
| Xfbb322b       | 4D | 116.5 |
| D1.1_ctg1187   | 4D | 120.5 |
| D1.1_ctg5687   | 4D | 120.5 |
| D1.1_ctg8300   | 4D | 120.5 |
| Xfbb226e       | 4D | 120.5 |
| Xgwm194        | 4D | 120.5 |
| Xfba177b       | 4D | 123.5 |
| Xgpw345        | 4D | 123.5 |
| D1.1_ctg6064_2 | 4D | 126.5 |
| D1.1_ctg8441_2 | 4D | 126.5 |
| Xbcd1431.2     | 4D | 126.5 |
| XksuS11        | 4D | 126.5 |
| Xwmc74         | 4D | 127.1 |
| D1.1_ctg6064_3 | 4D | 127.5 |

|                |    |       |
|----------------|----|-------|
| D1.1_ctg8441_3 | 4D | 127.5 |
| Xbcd1431d      | 4D | 127.5 |
| Xcdo949        | 4D | 127.5 |
| Xwmc74b        | 4D | 127.5 |
| X_beta-Amy-1   | 4D | 128.5 |
| Xwmc825        | 4D | 129.3 |
| Xpsr375.1      | 4D | 131.4 |
| Xgwm624        | 4D | 133.4 |
| Xgwm609        | 4D | 135.8 |
| XgbxG623       | 4D | 138.8 |
| Xcdo1528b      | 4D | 141.8 |
| Xcdo394b       | 4D | 141.8 |
| Xgwm538        | 4D | 144.8 |
| Xwg114b        | 4D | 147.8 |
| Xfbb182        | 4D | 149.8 |
| Xgpw2328b      | 4D | 150.8 |
| Xgpw311b       | 4D | 150.8 |
| Xgwm149        | 4D | 152.8 |
| Xgwm251        | 4D | 155.8 |
| XgbxG276       | 4D | 157.8 |
| Xcdo20b        | 4D | 159.8 |
| Xgwm6          | 4D | 161.8 |
| Xfbb58a        | 4D | 163.8 |
| Xgbx3581b      | 4D | 165.8 |
| D1.1_ctg9337_2 | 4D | 168.8 |
| Xcdo1312b      | 4D | 168.8 |
| XksuE2         | 4D | 168.8 |
| XksuG10        | 4D | 169.8 |
| Xcdo1401       | 4D | 170.8 |
| Xfba41         | 4D | 170.8 |
| Xfbb178b       | 4D | 170.8 |
| Xcfa2173       | 4D | 173.4 |
| Xbarc10        | 5A | 0     |
| Xpsr644        | 5A | 21.7  |
| Xwmc47         | 5A | 26.1  |
| P32/M62-7      | 5A | 30.3  |
| Xcni6b         | 5A | 30.3  |
| Xpsr170c       | 5A | 30.3  |
| Xwmc713        | 5A | 30.3  |
| Xbcd873a       | 5A | 31.3  |
| Xpsr945        | 5A | 32.1  |
| Xfbb276b       | 5A | 32.3  |
| Xfbb277c       | 5A | 32.3  |
| Xpsr549        | 5A | 32.3  |
| Xbarc122       | 5A | 33.3  |



|              |    |      |
|--------------|----|------|
| Xbarc135     | 5A | 33.3 |
| XgbxR665     | 5A | 34.3 |
| Xglk163a     | 5A | 34.3 |
| Xbarc316     | 5A | 37.3 |
| Xwmc169      | 5A | 37.3 |
| Xgwm205a     | 5A | 37.3 |
| Xgdm109      | 5A | 38.6 |
| Xgwm154a     | 5A | 39.4 |
| Xwmc654      | 5A | 40.3 |
| Xcfa2104     | 5A | 42.2 |
| wPt-1165     | 5A | 44.8 |
| Xwmc51       | 5A | 49.6 |
| BF202040-164 | 5A | 51.8 |
| wPt-2768     | 5A | 52.2 |
| wPt-4131     | 5A | 52.4 |
| wPt-9887     | 5A | 54.4 |
| XS13M60(570) | 5A | 65.3 |
| Xutv711      | 5A | 69.5 |
| Xgwm443a     | 5A | 71.4 |
| XgbxG625     | 5A | 72.4 |
| Xmag694      | 5A | 75.7 |
| Xwmc489      | 5A | 76   |
| P41/M61-2    | 5A | 77.6 |
| Xcfa2190     | 5A | 77.6 |
| Xpsr644a     | 5A | 78.6 |
| XS13M50(295) | 5A | 79.9 |
| P78/M92.1    | 5A | 81.3 |
| Xbcd1871.1   | 5A | 81.3 |
| wPt-0605     | 5A | 81.6 |
| Xpsr120      | 5A | 82.5 |
| Xmgb341      | 5A | 83   |
| Xabg397      | 5A | 83.2 |
| Xbarc303     | 5A | 83.2 |
| Xcdo785      | 5A | 83.4 |
| Xcfd17b      | 5A | 84.3 |
| Xgpw358b     | 5A | 84.3 |
| Xwg232.3     | 5A | 84.3 |
| Xubp3        | 5A | 84.5 |
| XWB117e      | 5A | 85.1 |
| Xpsr326.1    | 5A | 85.1 |
| Xpsr386.3    | 5A | 85.1 |
| wPt-3924     | 5A | 85.9 |
| XWB180e      | 5A | 86.1 |
| Xfba352      | 5A | 86.1 |
| Xpsr945a     | 5A | 86.1 |

|             |    |       |
|-------------|----|-------|
| TC91851     | 5A | 86.3  |
| Xcdo749.1   | 5A | 87    |
| Xfba131     | 5A | 87    |
| P34/M47-2   | 5A | 88    |
| P78/M43.10  | 5A | 88    |
| Xmgb340     | 5A | 88.5  |
| Xbcd1355    | 5A | 88.8  |
| Xpsr911a    | 5A | 89.6  |
| Xbarc358    | 5A | 90.3  |
| Xgwm328     | 5A | 90.4  |
| P36/M50-1   | 5A | 91.8  |
| Xpsr574     | 5A | 91.8  |
| F118        | 5A | 92.3  |
| Xbarc1      | 5A | 92.3  |
| Xgwm293     | 5A | 92.4  |
| Xbarc197    | 5A | 93.5  |
| Xcdo1335    | 5A | 95    |
| wPt-3884    | 5A | 95    |
| Xcdo341a    | 5A | 95    |
| Xgwm415     | 5A | 95    |
| Xwmc752     | 5A | 95    |
| Xgwm129     | 5A | 95.1  |
| P78/M43.3   | 5A | 96.1  |
| P78/M92.7   | 5A | 96.1  |
| XWB141e     | 5A | 96.1  |
| Xglk424     | 5A | 96.1  |
| Qfhs.ifa-5A | 5A | 97.1  |
| Xpsr150     | 5A | 97.1  |
| Xwmc2.194   | 5A | 97.1  |
| Xcfa2250    | 5A | 97.1  |
| Xwmc150     | 5A | 97.6  |
| Xwmc705     | 5A | 98.5  |
| Xbarc117    | 5A | 98.7  |
| wPt-9452    | 5A | 98.7  |
| Xmgb191     | 5A | 98.8  |
| Xbarc186    | 5A | 99.2  |
| wPt-3620    | 5A | 99.4  |
| Xwmc2.169b  | 5A | 100.3 |
| Xwmc2.54    | 5A | 100.3 |
| Xbarc56     | 5A | 100.9 |
| Xgwm786     | 5A | 100.9 |
| Xbcd1335b   | 5A | 102.4 |
| Xpsb85      | 5A | 102.4 |
| Xwg564a     | 5A | 102.4 |
| Xwmc805     | 5A | 102.4 |

|             |    |       |
|-------------|----|-------|
| Xmgb63      | 5A | 102.7 |
| Xbcd21      | 5A | 102.9 |
| Xmag3794    | 5A | 103.2 |
| Aadh-A1     | 5A | 103.3 |
| Xbarc180    | 5A | 104.1 |
| Xgwm304     | 5A | 104.3 |
| P41/M49-76  | 5A | 104.4 |
| BJ262177a   | 5A | 104.9 |
| Xbarc141    | 5A | 105.4 |
| XksuG44     | 5A | 106.3 |
| Xgwm156a    | 5A | 106.6 |
| Xbarc360    | 5A | 108   |
| Xmag4060    | 5A | 108.6 |
| wPt-3509    | 5A | 109   |
| wPt-2543    | 5A | 109.4 |
| wPt-6825    | 5A | 109.5 |
| Xgwm186     | 5A | 109.7 |
| wPt-4248    | 5A | 109.8 |
| XksuH1      | 5A | 110   |
| wPt-8226    | 5A | 110.1 |
| Xcdo57      | 5A | 110.4 |
| Xmag1159    | 5A | 110.4 |
| Xcdo412     | 5A | 111.2 |
| M85/P65.2   | 5A | 111.9 |
| P41/M47-10  | 5A | 111.9 |
| Xbarc165    | 5A | 111.9 |
| Xwmc446     | 5A | 111.9 |
| Xcni3b      | 5A | 112.9 |
| Xwg184      | 5A | 113.9 |
| P41/M48-184 | 5A | 115.9 |
| Xglk612     | 5A | 115.9 |
| Xgwm205     | 5A | 115.9 |
| Xpsr912     | 5A | 115.9 |
| Fr-A2       | 5A | 116.9 |
| Xgwm154     | 5A | 116.9 |
| Xgpw2311    | 5A | 117.9 |
| Xglk317c    | 5A | 118.9 |
| XksuD16     | 5A | 118.9 |
| Xglk614a    | 5A | 119.9 |
| Xbcd926     | 5A | 120.9 |
| Xmwg624     | 5A | 120.9 |
| Xpsr128     | 5A | 120.9 |
| Xbcd157b    | 5A | 121.9 |
| M71/P77.8   | 5A | 122.9 |
| Xcdo666     | 5A | 122.9 |

|              |    |       |
|--------------|----|-------|
| Xfbb2        | 5A | 122.9 |
| Xcdo1090A    | 5A | 123.9 |
| Xpsr911      | 5A | 124.9 |
| Xbcd1088     | 5A | 125.9 |
| Xbcd981      | 5A | 125.9 |
| Xpsr1202     | 5A | 125.9 |
| Xpsr806.1    | 5A | 125.9 |
| Xbcd1874a    | 5A | 126.9 |
| Xbcd1949     | 5A | 126.9 |
| Xcdo57B      | 5A | 126.9 |
| Xmwg522      | 5A | 126.9 |
| Xcfa2121     | 5A | 128.1 |
| wPt-5588     | 5A | 129.3 |
| Xbarc100     | 5A | 129.6 |
| Xwmc795      | 5A | 130.1 |
| Xgwm564      | 5A | 130.3 |
| Xgwm96       | 5A | 134.3 |
| Xwmc492      | 5A | 135   |
| wPt-7185     | 5A | 137.1 |
| Xbcd1235     | 5A | 137.4 |
| Xbarc330     | 5A | 137.5 |
| Xbcd508      | 5A | 138.7 |
| Xbarc40      | 5A | 143.4 |
| P78/M43.9a   | 5A | 146.7 |
| Xbcd1235.1   | 5A | 146.7 |
| Xgwm156b     | 5A | 146.7 |
| P31/M55-3    | 5A | 147.7 |
| QEet.fcu.5AL | 5A | 147.7 |
| Xpsr637      | 5A | 147.7 |
| Xbcd1235a    | 5A | 148.7 |
| tPt-0353b    | 5A | 149.1 |
| wPt-7201     | 5A | 149.1 |
| Xmwg914a     | 5A | 149.6 |
| Xpsr120a     | 5A | 149.6 |
| Xgwm617      | 5A | 150.2 |
| P33/M60-5    | 5A | 150.6 |
| Xpsr120b     | 5A | 150.6 |
| Xfba166a     | 5A | 151.6 |
| Xpsp3003     | 5A | 151.6 |
| Xfbb255x     | 5A | 152.6 |
| P35/M54-6    | 5A | 153.6 |
| Xpsr967.3    | 5A | 153.6 |
| Xbcd183      | 5A | 153.6 |
| P32/M51-7    | 5A | 154.6 |
| P38/M54-8    | 5A | 155.6 |

|                  |    |       |
|------------------|----|-------|
| Xgwm121.2        | 5A | 155.6 |
| Xwmc415          | 5A | 156.6 |
| Xcfd2            | 5A | 157.7 |
| Xcfd2g           | 5A | 158.3 |
| Xwmc630f         | 5A | 158.7 |
| Xwmc630          | 5A | 159.5 |
| Xwmc475          | 5A | 160.7 |
| Xbarc151         | 5A | 167   |
| F128             | 5A | 167.4 |
| Xwmc388          | 5A | 167.6 |
| Xgwm666          | 5A | 168   |
| Xgwm443          | 5A | 168.9 |
| Xwmc96           | 5A | 171.4 |
| Ksum137          | 5A | 172.1 |
| Xcfa2163         | 5A | 177   |
| Xcfa2155         | 5A | 180.2 |
| Xcfa2141a        | 5A | 181.3 |
| P40/M61-9        | 5A | 182.7 |
| Xpsr2021.1(Aba2) | 5A | 182.7 |
| Xmwg514          | 5A | 182.7 |
| Xfba190.1        | 5A | 183.7 |
| Xpsr575.2        | 5A | 183.7 |
| P33/M52-4        | 5A | 184.7 |
| XgbxG722b        | 5A | 184.7 |
| Xwmc445          | 5A | 185   |
| Xwmc96b          | 5A | 185.2 |
| Xgwm639          | 5A | 185.7 |
| Xrz395.1         | 5A | 185.7 |
| Xpsr426          | 5A | 185.8 |
| Xbarc232a        | 5A | 186.2 |
| Xbarc232         | 5A | 187.5 |
| Xcfa2185         | 5A | 190.3 |
| P41/M49-338      | 5A | 192.1 |
| Vrn1             | 5A | 192.1 |
| Xwmc327          | 5A | 192.1 |
| Xbarc230         | 5A | 193.1 |
| Xcdo1326         | 5A | 195.1 |
| Xfba68           | 5A | 196.1 |
| P31/M58-2        | 5A | 197.1 |
| Xpsr426.1        | 5A | 197.1 |
| Xbarc319         | 5A | 198.1 |
| Xfbb209.1        | 5A | 199.1 |
| Xgpw1086         | 5A | 199.1 |
| P40/M54-4        | 5A | 200.1 |
| Xfbb199          | 5A | 200.1 |

|             |    |       |
|-------------|----|-------|
| Xgpw2059    | 5A | 201.1 |
| M85/P65.0   | 5A | 203.1 |
| Xgpw2328a   | 5A | 203.1 |
| Xrab16      | 5A | 203.1 |
| Xfba351a    | 5A | 204.1 |
| wPt-9834    | 5A | 204.4 |
| wPt-7255    | 5A | 205.5 |
| Xwmc216.3eb | 5A | 205.8 |
| P38/M59-147 | 5A | 207.8 |
| Xbcd1235b   | 5A | 207.8 |
| Xgpw2120    | 5A | 209.8 |
| Xgpw2136    | 5A | 209.8 |
| Xgpw2181a   | 5A | 209.8 |
| M60/P64.4   | 5A | 211.8 |
| Xabg391     | 5A | 211.8 |
| Xgpw2172    | 5A | 211.8 |
| Xcdo457     | 5A | 212.8 |
| P35/M55-4   | 5A | 213.8 |
| Xbcd1235.2  | 5A | 213.8 |
| Xgpw2273a   | 5A | 213.8 |
| Xpsr145     | 5A | 213.8 |
| P33/M60-1   | 5A | 215.8 |
| Xabg366     | 5A | 215.8 |
| Xpsr1194    | 5A | 215.8 |
| Xwmc110     | 5A | 218.1 |
| Xpsr918     | 5A | 223.7 |
| wPt-9800a   | 5A | 226.9 |
| Xcdo1312c   | 5A | 227.4 |
| Xfbb249     | 5A | 228.4 |
| Xgwm126     | 5A | 228.5 |
| Xfbb330     | 5A | 229.5 |
| Xcfd39      | 5A | 230.5 |
| Xcfa2149    | 5A | 231   |
| Xpsr918b    | 5A | 231.3 |
| Pm2026      | 5A | 232.4 |
| Xwmc577     | 5A | 232.5 |
| Xcdo20a     | 5A | 232.6 |
| Xcdo1528a   | 5A | 233.6 |
| Xcdo394a    | 5A | 233.6 |
| Xwg114a     | 5A | 233.6 |
| Xgwm179     | 5A | 233.6 |
| Xgwm114     | 5A | 235.4 |
| Xwmc2.180   | 5A | 235.5 |
| Xgwm595     | 5A | 238.5 |
| Xpsr1201b   | 5A | 238.5 |

|              |    |       |
|--------------|----|-------|
| Xwmc524      | 5A | 240.5 |
| wPt-5231     | 5A | 241.9 |
| Xwmc727      | 5A | 244.3 |
| Xgwm6.2      | 5A | 252.1 |
| Xgwm6b       | 5A | 252.1 |
| Xmwg2112     | 5A | 254.1 |
| Nax2         | 5A | 255.1 |
| Xgwm291      | 5A | 255.1 |
| Xgwm410      | 5A | 257.8 |
| B1           | 5A | 259.6 |
| M65/P64.9a   | 5A | 261.6 |
| Xgwm410.1    | 5A | 261.6 |
| P43/M62-5    | 5A | 262.6 |
| beta-Amy-1   | 5A | 268.6 |
| Xcfd5        | 5B | 0     |
| BE404594-175 | 5B | 3.2   |
| Xwmc773      | 5B | 8.2   |
| Xwmc630      | 5B | 12.5  |
| Xbarc240     | 5B | 13.1  |
| Xbarc21      | 5B | 14.2  |
| Xcfd60       | 5B | 15.4  |
| Xwmc47       | 5B | 25    |
| wPt-3439c    | 5B | 29.6  |
| Xwmc728      | 5B | 43.4  |
| Xcfd20       | 5B | 44.4  |
| Xgwm234      | 5B | 44.5  |
| wPt-6136     | 5B | 45.4  |
| wPt-1302     | 5B | 45.7  |
| wPt-9800b    | 5B | 50.7  |
| wPt-0033     | 5B | 54    |
| Xdupw115     | 5B | 54.8  |
| Lr52         | 5B | 56.5  |
| P39/M50-4    | 5B | 56.5  |
| Xbcd873a     | 5B | 56.5  |
| Xfbb276a     | 5B | 57.5  |
| Xgwm443      | 5B | 57.7  |
| Xpsr170a     | 5B | 58.5  |
| P32/M47-1    | 5B | 62.5  |
| P31/M49-3    | 5B | 64.5  |
| Xgpw1056     | 5B | 64.5  |
| P35/M52-3    | 5B | 65.5  |
| wPt-0819     | 5B | 66.4  |
| P31/M57-3    | 5B | 66.5  |
| P32/M48-234  | 5B | 66.5  |
| P42/M60-4    | 5B | 66.5  |

|             |    |      |
|-------------|----|------|
| Xcdo749a    | 5B | 66.5 |
| Xpsr326a    | 5B | 66.5 |
| Xpsr929a    | 5B | 66.5 |
| wPt-7861    | 5B | 67.6 |
| P38/M59-114 | 5B | 68.7 |
| Xgwm443.2   | 5B | 68.7 |
| wPt-1420    | 5B | 69   |
| wPt-9666    | 5B | 69   |
| wPt-8604    | 5B | 69.1 |
| wPt-9724    | 5B | 69.9 |
| Xfba232a    | 5B | 70.7 |
| wPt-1261    | 5B | 71.3 |
| Xfbb238     | 5B | 72.8 |
| Xgpw1072    | 5B | 72.8 |
| P78/M72.3   | 5B | 73.8 |
| Xcdo1335    | 5B | 73.8 |
| Xfba393a    | 5B | 73.8 |
| Xfba342a    | 5B | 74.8 |
| Xwmc149     | 5B | 75.8 |
| Pm16        | 5B | 77.8 |
| Xcfa2121a   | 5B | 78.5 |
| Xgdm146     | 5B | 80.8 |
| Xwmc274     | 5B | 81.6 |
| wPt-3931    | 5B | 81.6 |
| Xwmc813     | 5B | 81.6 |
| Xwmc740     | 5B | 82.2 |
| Xgwm159a    | 5B | 83   |
| Xfbb161     | 5B | 83.1 |
| Xfbb277.1   | 5B | 83.1 |
| Xgwm133     | 5B | 83.1 |
| P33/M52-9   | 5B | 86.1 |
| Xfbb292     | 5B | 86.1 |
| Xgwm66a     | 5B | 87.1 |
| Xbcd873b    | 5B | 87.4 |
| Xgwm540     | 5B | 87.4 |
| Xwmc247     | 5B | 88.4 |
| Xgwm191     | 5B | 89   |
| Xcdo959.2   | 5B | 90.5 |
| Xgwm843.1   | 5B | 90.5 |
| P36/M48-2   | 5B | 91.5 |
| XWD115l     | 5B | 91.5 |
| wPt-5346    | 5B | 92.4 |
| wPt-5914    | 5B | 92.4 |
| wPt-6348    | 5B | 92.4 |
| Xgsy60      | 5B | 92.5 |



|             |    |       |
|-------------|----|-------|
| Xwmc333.2   | 5B | 92.5  |
| wPt-5175    | 5B | 92.5  |
| P39/M53-2   | 5B | 93.7  |
| Xopf8-170   | 5B | 93.7  |
| Xwmc376     | 5B | 93.7  |
| Xwmc682     | 5B | 93.7  |
| Xwmc386     | 5B | 93.8  |
| Xpsr326     | 5B | 96.9  |
| Xpsr929     | 5B | 96.9  |
| Xbarc4      | 5B | 97.2  |
| CA707573    | 5B | 98.3  |
| Xbarc340    | 5B | 99.5  |
| wPt-5688    | 5B | 99.5  |
| wPt-9814a   | 5B | 99.6  |
| wPt-5737a   | 5B | 99.8  |
| wPt-6052    | 5B | 99.8  |
| wPt-2041    | 5B | 100   |
| tPt-0228    | 5B | 100.2 |
| Xmwg561     | 5B | 101.7 |
| wPt-2586    | 5B | 101.8 |
| Xgwm544     | 5B | 102.1 |
| wPt-6263    | 5B | 103.5 |
| Xwmc616     | 5B | 103.8 |
| Xwmc73      | 5B | 104.2 |
| Xcfa2070    | 5B | 104.8 |
| Xwmc363     | 5B | 105.3 |
| Xfbb121.2   | 5B | 106.3 |
| Xfba367.1   | 5B | 107.3 |
| Xwmc188     | 5B | 107.3 |
| Xbarc32     | 5B | 108.3 |
| P39/M49-82  | 5B | 110.3 |
| P42/M51-116 | 5B | 110.3 |
| Xgwm293     | 5B | 110.3 |
| Xmtd116     | 5B | 111.3 |
| Xbarc88     | 5B | 111.4 |
| Xgwm274     | 5B | 111.5 |
| Xgwm68a     | 5B | 112.2 |
| Xbarc216    | 5B | 112.4 |
| Xgwm67      | 5B | 112.5 |
| Xwg232.2    | 5B | 113.3 |
| Xpsr170b    | 5B | 114.3 |
| Xpsr304     | 5B | 114.3 |
| M71/P77.13  | 5B | 115.3 |
| P38/M61-3   | 5B | 115.3 |
| Xcfd219a    | 5B | 115.3 |

|            |    |       |
|------------|----|-------|
| Xfba393b   | 5B | 115.3 |
| XgbxG060   | 5B | 115.3 |
| Xabg705    | 5B | 116.3 |
| Xcdo1338x  | 5B | 117.3 |
| Xfba342b   | 5B | 117.3 |
| Xbcd1871.2 | 5B | 118.3 |
| Xcdo749b   | 5B | 119.3 |
| XgbxG198   | 5B | 119.3 |
| Xgwm66b    | 5B | 119.3 |
| Xpsr929b   | 5B | 119.3 |
| Xbcd1024   | 5B | 120.3 |
| Xfba232b   | 5B | 121.3 |
| Xgwm159    | 5B | 121.3 |
| Xbarc109   | 5B | 122.3 |
| Xgwm68b    | 5B | 122.3 |
| wPt-1457a  | 5B | 122.5 |
| wPt-1505b  | 5B | 122.6 |
| Xgwm247    | 5B | 122.8 |
| M51/P65.4  | 5B | 122.9 |
| Xbarc89    | 5B | 123.1 |
| wPt-3569b  | 5B | 123.5 |
| wPt-1951   | 5B | 123.8 |
| Xbarc176   | 5B | 123.9 |
| wPt-8106a  | 5B | 124   |
| wPt-6902   | 5B | 124.1 |
| Xgpw1102   | 5B | 124.3 |
| Xpsr118    | 5B | 124.3 |
| Xpsr326b   | 5B | 124.3 |
| Xgwm564    | 5B | 124.5 |
| Xpsr128    | 5B | 124.5 |
| wPt-9467a  | 5B | 124.5 |
| wPt-5514   | 5B | 124.7 |
| Ne1        | 5B | 125.3 |
| Xmwg561.1  | 5B | 125.3 |
| wPt-0103a  | 5B | 125.3 |
| XgbxG541   | 5B | 125.6 |
| Xpsr128.1  | 5B | 125.6 |
| Xpsr574    | 5B | 125.6 |
| Xgwm335    | 5B | 125.6 |
| Xgwm213    | 5B | 125.9 |
| wPt-8890   | 5B | 126   |
| Xwmc435    | 5B | 127.2 |
| Stb1       | 5B | 127.9 |
| Xabc164    | 5B | 127.9 |
| Xwg564b    | 5B | 127.9 |

|                |    |       |
|----------------|----|-------|
| Xwg889         | 5B | 127.9 |
| Xbarc74        | 5B | 127.9 |
| P78/M69        | 5B | 128.9 |
| XWB109I        | 5B | 128.9 |
| Xbcd157.1      | 5B | 128.9 |
| Xgpw358a       | 5B | 128.9 |
| Xwg909         | 5B | 128.9 |
| Xwmc745        | 5B | 129.4 |
| Xfba127c       | 5B | 129.9 |
| Xgwm831        | 5B | 129.9 |
| Xmta6          | 5B | 129.9 |
| Xgwm777        | 5B | 130.2 |
| wPt-4996       | 5B | 130.4 |
| wPt-0935       | 5B | 130.5 |
| QGpc.ndsu-5B.3 | 5B | 131   |
| XksuA1         | 5B | 131   |
| Xgwm371        | 5B | 131.5 |
| P78/M49.3      | 5B | 132   |
| Xcdo412        | 5B | 132   |
| Xfba65         | 5B | 132   |
| Xtam72c        | 5B | 132   |
| Xcfd2h         | 5B | 132.7 |
| XWB074I        | 5B | 133.1 |
| Xcfd2a         | 5B | 133.1 |
| Xcfd2          | 5B | 133.2 |
| Xgwm499        | 5B | 134   |
| P40/M55        | 5B | 134.2 |
| wPt-4936       | 5B | 135   |
| P37/M49-4      | 5B | 135.2 |
| Xgwm639        | 5B | 136   |
| wPt-7167       | 5B | 136.1 |
| Xbcd1140       | 5B | 136.5 |
| Xwg530         | 5B | 136.5 |
| Xbcd351        | 5B | 136.5 |
| Xgwm1073       | 5B | 137   |
| Xwmc405        | 5B | 137.1 |
| P31M48i        | 5B | 137.6 |
| Xwmc759        | 5B | 138.2 |
| wPt-4246       | 5B | 138.5 |
| wPt-2318       | 5B | 138.7 |
| Xdupw395a      | 5B | 138.8 |
| P37/M47-3      | 5B | 139.3 |
| Xfbb121a       | 5B | 139.3 |
| Xgpw1082       | 5B | 139.3 |
| Xwmc415        | 5B | 139.3 |

|             |    |       |
|-------------|----|-------|
| wPt-3661    | 5B | 139.3 |
| wPt-3457    | 5B | 139.8 |
| wPt-7101    | 5B | 139.9 |
| P37/M51-3   | 5B | 140.1 |
| P40/M55-4   | 5B | 140.1 |
| P40/M61-11  | 5B | 140.1 |
| Xpsr725     | 5B | 140.1 |
| Xpsr911     | 5B | 140.1 |
| wPt-4628    | 5B | 140.1 |
| Xgwm530     | 5B | 140.2 |
| wPt-5851    | 5B | 140.2 |
| wPt-9356    | 5B | 140.2 |
| MI3D232     | 5B | 140.6 |
| wPt-1250a   | 5B | 140.6 |
| wPt-3503a   | 5B | 140.6 |
| Xbcd508.1   | 5B | 141   |
| Xcdo1192    | 5B | 141   |
| wPt-9613    | 5B | 141.9 |
| P35/M55-2   | 5B | 142   |
| Xabg473.1   | 5B | 142   |
| Xmwg52      | 5B | 143   |
| Xwmc537     | 5B | 143.4 |
| P32/M51-4   | 5B | 144   |
| P35/M52-2   | 5B | 144   |
| XgbxG739    | 5B | 144   |
| P41/M60-6   | 5B | 145   |
| Xcdo1168    | 5B | 145   |
| Xgwm554b    | 5B | 145   |
| Xcdo400     | 5B | 145   |
| Xpsr911b    | 5B | 145   |
| P44/M68-109 | 5B | 146   |
| P37/M54-1   | 5B | 147   |
| P33/M60-4   | 5B | 148   |
| Xmwg922     | 5B | 148   |
| wPt-6135    | 5B | 148.6 |
| Fr-B2       | 5B | 149.8 |
| P31/M56-3   | 5B | 150.8 |
| Xmwg914     | 5B | 150.8 |
| P32/M59-8   | 5B | 152.8 |
| P34/M58-3   | 5B | 152.8 |
| Xcdo346A    | 5B | 152.8 |
| Xpsp3037    | 5B | 152.8 |
| Xbcd307.2   | 5B | 153.8 |
| Xgwm554     | 5B | 153.8 |
| BQ237037-30 | 5B | 154   |

|                  |    |       |
|------------------|----|-------|
| Xcfd7            | 5B | 159.4 |
| Xgpw7356         | 5B | 160   |
| wPt-0498         | 5B | 160   |
| P38/M51-1        | 5B | 160.9 |
| PmAS846          | 5B | 161.4 |
| Xcfd7a           | 5B | 161.6 |
| Xbcd9            | 5B | 162   |
| Xpsr806.2        | 5B | 162   |
| wPt-9454         | 5B | 162.7 |
| Xfba166.1        | 5B | 163.1 |
| Xfba348          | 5B | 163.1 |
| Xopal7-470       | 5B | 163.1 |
| Xwg583a          | 5B | 164.1 |
| Xfba332.1        | 5B | 166.1 |
| Xfbb237.1        | 5B | 166.1 |
| wPt-5928         | 5B | 166.8 |
| wPt-5604         | 5B | 166.9 |
| wPt-8054         | 5B | 166.9 |
| Xpsr120.2        | 5B | 167.2 |
| Pm36             | 5B | 167.6 |
| BJ261635         | 5B | 168.1 |
| wPt-1733         | 5B | 168.1 |
| wPt-2453         | 5B | 168.1 |
| wPt-4367         | 5B | 168.1 |
| wPt-6989         | 5B | 168.1 |
| wPt-9300         | 5B | 168.1 |
| Xgwm271b         | 5B | 170   |
| Xwmc289a         | 5B | 170   |
| Xgwm271a         | 5B | 170.2 |
| Xcfd156          | 5B | 170.4 |
| Xfba237          | 5B | 170.4 |
| Xwmc326          | 5B | 171   |
| wPt-6014         | 5B | 171.8 |
| Xwmc75           | 5B | 172.3 |
| Xfba259c         | 5B | 173.3 |
| M65/P64.8a       | 5B | 174.3 |
| Xfba332.2        | 5B | 174.3 |
| Xbcd1030         | 5B | 176.3 |
| P41/M47-5        | 5B | 179.3 |
| XgbxG722a        | 5B | 179.3 |
| Xcdo504          | 5B | 180.3 |
| Xpsr2021.2(Aba2) | 5B | 180.3 |
| P42/M60-1        | 5B | 181.3 |
| XgbxG723         | 5B | 181.3 |
| Xglk510b         | 5B | 181.3 |

|                |    |       |
|----------------|----|-------|
| Xcdo465b       | 5B | 182.3 |
| P32/M59-4      | 5B | 183.3 |
| Xbcd450B       | 5B | 185.3 |
| PA41/M47-4     | 5B | 186.3 |
| Vrn-B1         | 5B | 187.3 |
| P43/M59-1      | 5B | 190.3 |
| QYld.ndsu-5B   | 5B | 190.3 |
| Xgwm604        | 5B | 190.3 |
| Xcdo348        | 5B | 191.3 |
| Xfbb328        | 5B | 191.3 |
| Xgwm408        | 5B | 191.3 |
| Xwmc810        | 5B | 195.6 |
| QGpc.ndsu-5B.1 | 5B | 196.5 |
| QGw1.inra-5B   | 5B | 196.5 |
| Xcdo1326.1     | 5B | 196.5 |
| Xpsr426.2      | 5B | 197.5 |
| Xwmc500g       | 5B | 197.5 |
| rPt-7889       | 5B | 199   |
| Xwmc500        | 5B | 200.8 |
| Xbarc140       | 5B | 201.9 |
| Xcdo584        | 5B | 202.9 |
| tPt-1253       | 5B | 203.3 |
| wPt-8931       | 5B | 203.8 |
| Xfba351.2      | 5B | 203.9 |
| Xbarc156       | 5B | 204.9 |
| Xpsr157        | 5B | 204.9 |
| Xwmc99         | 5B | 204.9 |
| Xcfa2121b      | 5B | 206   |
| Xbarc308.1     | 5B | 206.1 |
| Xwg908a        | 5B | 206.1 |
| wPt-2707       | 5B | 206.3 |
| wPt-1482b      | 5B | 206.7 |
| wPt-3076       | 5B | 206.7 |
| wPt-9103b      | 5B | 206.7 |
| wPt-9598b      | 5B | 206.7 |
| Xbarc142       | 5B | 207.4 |
| Xbcd221        | 5B | 207.4 |
| XgbxG521       | 5B | 207.4 |
| wPt-8094       | 5B | 207.4 |
| Xbarc25b       | 5B | 208.1 |
| Xwmc734        | 5B | 209.1 |
| Xgpw2243a      | 5B | 209.4 |
| Xgdm116        | 5B | 210   |
| Xwmc160        | 5B | 210.3 |
| P40/M55-7      | 5B | 211.1 |

|             |    |       |
|-------------|----|-------|
| XgbxR570    | 5B | 211.1 |
| Xbarc232    | 5B | 211.1 |
| wPt-4577    | 5B | 213.7 |
| Xcfd86b     | 5B | 216.8 |
| P34/M47-4   | 5B | 218.8 |
| P34/M50-1   | 5B | 220.8 |
| XSsib       | 5B | 220.8 |
| Xwmc235     | 5B | 220.8 |
| Xcfd86      | 5B | 221.3 |
| Xwmc28      | 5B | 221.5 |
| P39/M49-135 | 5B | 222.5 |
| P32/M52-243 | 5B | 223.5 |
| Xfbb323     | 5B | 223.5 |
| Xwmc27      | 5B | 223.5 |
| Xwmc118     | 5B | 224.5 |
| Xwmc508     | 5B | 225.5 |
| Xgwm790     | 5B | 226.1 |
| wPt-8418a   | 5B | 233.8 |
| wPt-7561    | 5B | 234.4 |
| Xwmc640     | 5B | 235.8 |
| P32/M52-374 | 5B | 237.6 |
| Xbarc69     | 5B | 237.6 |
| wPt-1348    | 5B | 241   |
| wPt-1179    | 5B | 241.7 |
| Xbarc59     | 5B | 243   |
| Xwmc430     | 5B | 243.1 |
| Xwmc783     | 5B | 246.4 |
| Xpsp3065    | 5B | 247.9 |
| Xwg583b     | 5B | 248.9 |
| Xopaf5-650  | 5B | 252.9 |
| Xgwm497     | 5B | 254.7 |
| wPt-7665    | 5B | 259.4 |
| wPt-9116    | 5B | 262.1 |
| Xwmc258     | 5B | 263.3 |
| Xgwm118     | 5B | 263.9 |
| wPt-0054    | 5B | 264.1 |
| wPt-5429    | 5B | 264.9 |
| wPt-1500    | 5B | 265.6 |
| wPt-8920a   | 5B | 265.9 |
| wPt-0295    | 5B | 266   |
| wPt-4402    | 5B | 266   |
| wPt-7708    | 5B | 266.9 |
| wPt-4723    | 5B | 267.6 |
| wPt-3922    | 5B | 267.7 |
| wPt-5373    | 5B | 268.9 |

|                |    |       |
|----------------|----|-------|
| wPt-5168       | 5B | 269.7 |
| Xabc310.1      | 5B | 271.9 |
| TC86533        | 5B | 272   |
| QGpc.ndsu-5B.2 | 5B | 273.9 |
| wPt-0484       | 5B | 273.9 |
| Xwg908b        | 5B | 276.9 |
| wPt-7036       | 5B | 279.4 |
| wPt-8553       | 5B | 281.2 |
| wPt-0837       | 5B | 290.6 |
| Xpsr580b       | 5B | 307.1 |
| Xpsr143        | 5B | 325.8 |
| Xwmc233        | 5D | 0     |
| wPt-1400       | 5D | 0.1   |
| Ha             | 5D | 3.4   |
| Pina-D1        | 5D | 3.4   |
| Xcfd165        | 5D | 3.4   |
| Xmta10         | 5D | 3.4   |
| Xmta9          | 5D | 3.4   |
| Xbarc130       | 5D | 3.4   |
| Xbarc140       | 5D | 3.4   |
| Xcfd18         | 5D | 4     |
| Xgwm190        | 5D | 8.5   |
| Xgpw326        | 5D | 9.5   |
| Xgwm192        | 5D | 11.5  |
| Xfba114        | 5D | 12.5  |
| wPt-2856       | 5D | 16    |
| Xcfa2104       | 5D | 20    |
| Xfba393b       | 5D | 20    |
| Xcfd189        | 5D | 20.9  |
| wPt-5766       | 5D | 23.2  |
| Xbarc205       | 5D | 23.4  |
| Xgwm205        | 5D | 25.1  |
| Xfbb238        | 5D | 25.8  |
| PmD57-5D       | 5D | 32.6  |
| Xcfd78         | 5D | 36.4  |
| Xfba137        | 5D | 37.4  |
| XgbxR958       | 5D | 38.4  |
| Xgdm68         | 5D | 39.4  |
| Xbarc44        | 5D | 41.4  |
| XksuD30        | 5D | 41.4  |
| Xopai5-540     | 5D | 41.4  |
| Xwmc150        | 5D | 41.4  |
| Xwmc606a       | 5D | 41.6  |
| Xbarc143       | 5D | 41.9  |
| Xcfd37         | 5D | 43.2  |



|               |    |      |
|---------------|----|------|
| Xcfd67        | 5D | 43.4 |
| Xgwm358       | 5D | 43.9 |
| Xgwm16        | 5D | 44.3 |
| Xgwm159       | 5D | 45   |
| Xwmc608       | 5D | 45.1 |
| Xwmc318       | 5D | 45.3 |
| Xcfd81        | 5D | 46.1 |
| Xcfd74        | 5D | 46.3 |
| Xwmc805       | 5D | 47   |
| P41/M51-309   | 5D | 47.2 |
| Xgpw302       | 5D | 47.2 |
| Xpsr326b      | 5D | 48.2 |
| Xgdm153       | 5D | 49   |
| Xcmwg770      | 5D | 49.1 |
| Xwmc799       | 5D | 49.6 |
| Xcfd266       | 5D | 50   |
| P39/M49-339   | 5D | 50.6 |
| Xcfd40        | 5D | 50.9 |
| Xbarc49       | 5D | 51.9 |
| Xgdm138       | 5D | 53.2 |
| Xgwm561c      | 5D | 54.2 |
| Xmwg561c      | 5D | 54.2 |
| P35/M57-3     | 5D | 56.2 |
| Xgpw341       | 5D | 56.2 |
| D1.1_ctg4076  | 5D | 57.2 |
| Xcdo412B      | 5D | 57.2 |
| Xcfd8         | 5D | 59.2 |
| Xwmc405       | 5D | 59.4 |
| Xbcd1874      | 5D | 60.1 |
| Xgwm583       | 5D | 60.4 |
| D1.1_ctg12395 | 5D | 61   |
| D1.1_ctg233   | 5D | 61   |
| D1.1_ctg6927  | 5D | 61   |
| Xfbb156a      | 5D | 61   |
| PmY212        | 5D | 61.1 |
| Xgdm136       | 5D | 61.6 |
| D1.1_ctg605   | 5D | 62.3 |
| Xbarc286      | 5D | 62.3 |
| Xcdo57B       | 5D | 62.3 |
| Xgwm494       | 5D | 62.3 |
| XWC0008s      | 5D | 63.3 |
| Xcfd4c        | 5D | 64.3 |
| Xgwm639       | 5D | 64.3 |
| Xgdm43        | 5D | 66.3 |
| Xgpw303       | 5D | 67.3 |

|              |    |      |
|--------------|----|------|
| Xgwm182      | 5D | 68.2 |
| Xwmc630      | 5D | 69   |
| Xcfd26       | 5D | 69.1 |
| Xfba166b     | 5D | 69.1 |
| XWC0057s     | 5D | 70.1 |
| Xbarc347     | 5D | 70.1 |
| Xcfd101      | 5D | 70.1 |
| Xcfd7        | 5D | 71.1 |
| Xcfd3        | 5D | 71.4 |
| Xwmc818      | 5D | 71.4 |
| Xwmc574      | 5D | 71.7 |
| Xcfd12       | 5D | 72.3 |
| Xpsr806.3    | 5D | 72.3 |
| Xcfd102      | 5D | 73   |
| Xcfd57       | 5D | 73   |
| XgbxG083     | 5D | 73.2 |
| Xgpw5207     | 5D | 73.2 |
| Xgwm174      | 5D | 73.5 |
| Xcdo1508     | 5D | 76.5 |
| Xbarc320     | 5D | 77.5 |
| Xwmc289      | 5D | 78.1 |
| D1.1_ctg3162 | 5D | 78.4 |
| Xfbb26       | 5D | 78.4 |
| D1.1_ctg4878 | 5D | 79.4 |
| P36/M61-170  | 5D | 79.4 |
| Xabg3        | 5D | 79.4 |
| XWC0007ls    | 5D | 80.4 |
| Xwmc289b     | 5D | 80.4 |
| lbf-D1b      | 5D | 81   |
| Pm35         | 5D | 81   |
| Xgwm121      | 5D | 81.1 |
| Xbarc361.2   | 5D | 81.6 |
| Xgwm271      | 5D | 81.6 |
| Xfba209c     | 5D | 82.6 |
| Xrz395.2     | 5D | 83.6 |
| M77/P64.8    | 5D | 84.6 |
| Xbcd450.2    | 5D | 84.6 |
| PmY201       | 5D | 85.3 |
| XgbxG333     | 5D | 85.5 |
| Xbarc93      | 5D | 86.5 |
| XgbxG070     | 5D | 86.5 |
| XgbxG722c    | 5D | 86.5 |
| XgbxR697     | 5D | 86.5 |
| Xgpw298      | 5D | 86.5 |
| P32/M48-237  | 5D | 88.5 |

|              |    |       |
|--------------|----|-------|
| Xwmc215      | 5D | 89.5  |
| Xwmc264      | 5D | 91.4  |
| Xgwm292      | 5D | 91.5  |
| Xmwg900      | 5D | 92.5  |
| Xwmc95       | 5D | 93.5  |
| Xgwm212      | 5D | 94.1  |
| Xwmc434      | 5D | 94.6  |
| Xwmc434b     | 5D | 95.2  |
| Xcfd156      | 5D | 96.6  |
| Sr30         | 5D | 97    |
| Xcfd29       | 5D | 98    |
| Xbarc322     | 5D | 99    |
| Xcfd19       | 5D | 99.9  |
| QFhs.inra-5D | 5D | 100.1 |
| Xwmc788      | 5D | 100.3 |
| Xcfd183      | 5D | 102.9 |
| Xmwg922      | 5D | 104.6 |
| Xwmc160      | 5D | 104.6 |
| Xwmc636      | 5D | 104.6 |
| Xwmc97       | 5D | 105.1 |
| Xcfd2i       | 5D | 106   |
| Xcfa2141     | 5D | 106.9 |
| Xbarc232     | 5D | 108.9 |
| M62/P64.9a   | 5D | 109.2 |
| Xwmc357      | 5D | 109.2 |
| Xgdm133      | 5D | 111.6 |
| Xcfd2        | 5D | 113   |
| Xbcd1103     | 5D | 115.5 |
| Xgdm63       | 5D | 115.5 |
| Xwmc206      | 5D | 116.4 |
| D1.1_ctg19   | 5D | 119.4 |
| D1.1_ctg8851 | 5D | 119.4 |
| P38/M47-1    | 5D | 119.4 |
| Xcdo346      | 5D | 119.4 |
| Xbarc110     | 5D | 120.4 |
| Xgpw343      | 5D | 120.4 |
| Xcfd86       | 5D | 121.4 |
| Xcfd283      | 5D | 122.3 |
| Xwmc640      | 5D | 124.6 |
| Xcfd10       | 5D | 128.9 |
| Xcfd2b       | 5D | 130.3 |
| Xopaf6-655   | 5D | 130.3 |
| XgbxR678     | 5D | 131.3 |
| Xwmc161b     | 5D | 133.7 |
| Xfbb100      | 5D | 134.7 |

|              |    |       |
|--------------|----|-------|
| Xfbb213      | 5D | 134.7 |
| Xwmc161      | 5D | 135.1 |
| P38/M47-3    | 5D | 135.9 |
| Xgwm99.2     | 5D | 135.9 |
| Xwmc96       | 5D | 137.9 |
| Xgwm469      | 5D | 138.5 |
| Xbarc177     | 5D | 139.7 |
| Xbcd1670b    | 5D | 139.7 |
| Xwmc765      | 5D | 140.3 |
| Pm34         | 5D | 142.4 |
| P78/M92.9    | 5D | 144.4 |
| Xbarc144     | 5D | 145.4 |
| Xbcd1421     | 5D | 145.4 |
| Xbcd87a      | 5D | 145.4 |
| XWB144s      | 5D | 146.4 |
| Xfba364      | 5D | 146.4 |
| Xcfd25b      | 5D | 147.4 |
| Xfba11a      | 5D | 147.4 |
| Xgpw323      | 5D | 147.4 |
| Xgpw335      | 5D | 147.4 |
| Xpsr375.3    | 5D | 147.4 |
| Xpsr567.1    | 5D | 147.4 |
| Xgwm269      | 5D | 147.4 |
| Xgwm565      | 5D | 147.6 |
| D1.1_ctg3736 | 5D | 148.6 |
| D1.1_ctg8080 | 5D | 148.6 |
| M77/P64.10   | 5D | 148.6 |
| Xbcd197      | 5D | 148.6 |
| Xbcd87b      | 5D | 148.6 |
| Xcdo506      | 5D | 148.6 |
| Xfba11b      | 5D | 148.6 |
| Xgpw2323     | 5D | 148.6 |
| Xcdo1373a    | 5D | 149.6 |
| Xgwm272      | 5D | 150.6 |
| Xwmc443      | 5D | 151.3 |
| Xgwm654      | 5D | 152.6 |
| Lr1          | 5D | 154.3 |
| P35/M57-1    | 5D | 155.6 |
| P78/M87.7    | 6A | 0     |
| Xpsr899      | 6A | 11    |
| Xbcd342.1    | 6A | 12    |
| Xpsr889.2    | 6A | 13    |
| wPt-1377     | 6A | 16.5  |
| BQ805704     | 6A | 16.6  |
| XksuG8       | 6A | 17.6  |

|            |    |      |
|------------|----|------|
| wPt-1664   | 6A | 17.6 |
| Xbcd1821.1 | 6A | 18.6 |
| Xfba152    | 6A | 19.1 |
| Xfbb222    | 6A | 19.1 |
| Xpsr167    | 6A | 19.1 |
| Xfbb47     | 6A | 19.3 |
| Xgwm459a   | 6A | 19.5 |
| wPt-0832   | 6A | 20   |
| wPt-9382   | 6A | 20.1 |
| XgbxG036b  | 6A | 21.5 |
| Xgpw2023   | 6A | 21.5 |
| Xfba65     | 6A | 22.5 |
| Xfbb194    | 6A | 22.5 |
| wPt-0562a  | 6A | 23.3 |
| Xgpw2295   | 6A | 24   |
| Xgpw2332   | 6A | 24   |
| Xutv1391   | 6A | 24.6 |
| Xbcd21a    | 6A | 29.2 |
| Xcdo476b   | 6A | 29.2 |
| Xfbb147    | 6A | 29.2 |
| Xgwm459    | 6A | 29.2 |
| Xfbb209    | 6A | 30.2 |
| Xpsr967    | 6A | 32.2 |
| XgbxR593   | 6A | 33.2 |
| Xgwm334    | 6A | 36.2 |
| Xwg487     | 6A | 36.2 |
| XCp3.2     | 6A | 37.2 |
| XA2437b    | 6A | 38.2 |
| Xwmc388    | 6A | 38.2 |
| wPt-4589   | 6A | 38.3 |
| wPt-4255   | 6A | 38.5 |
| Xmwg67.1   | 6A | 39.1 |
| wPt-3468   | 6A | 39.6 |
| wPt-4047   | 6A | 39.9 |
| Xcfd1      | 6A | 39.9 |
| Xcmwg652   | 6A | 39.9 |
| wPt-5395   | 6A | 40.1 |
| wPt-5633   | 6A | 40.1 |
| wPt-1742   | 6A | 40.2 |
| wPt-9832   | 6A | 40.5 |
| wPt-9306   | 6A | 40.6 |
| Xfbb166    | 6A | 40.7 |
| Xpsp302.3  | 6A | 40.7 |
| Xfbb255b   | 6A | 41.7 |
| XksuG48    | 6A | 41.7 |

|                 |    |      |
|-----------------|----|------|
| Xpsr8(Cxp3)     | 6A | 41.7 |
| Xmta15          | 6A | 42.7 |
| Xmtd184         | 6A | 43.7 |
| Xpsr10(Gli-2).1 | 6A | 43.7 |
| Xpsr10          | 6A | 47.7 |
| Xpsr119a        | 6A | 47.7 |
| wPt-4270        | 6A | 47.7 |
| XS25M55(90)     | 6A | 48   |
| wPt-6520        | 6A | 48.2 |
| wPt-7754        | 6A | 48.3 |
| wPt-0864        | 6A | 48.5 |
| wPt-6396        | 6A | 48.5 |
| P35/M61-6       | 6A | 49.3 |
| wPt-8006        | 6A | 49.4 |
| wPt-2636        | 6A | 50   |
| P42/M52-1       | 6A | 51.3 |
| Xfba85.1        | 6A | 51.3 |
| Xmwig652        | 6A | 51.3 |
| wPt-4017        | 6A | 52.2 |
| wPt-7330        | 6A | 52.2 |
| wPt-7840        | 6A | 52.2 |
| wPt-7938        | 6A | 52.2 |
| wPt-9075        | 6A | 52.2 |
| P39/M50-8       | 6A | 52.3 |
| Xabg466         | 6A | 52.3 |
| Xfba307a        | 6A | 52.3 |
| wPt-0495        | 6A | 52.8 |
| P40/M49-4       | 6A | 53.3 |
| Xmtd15          | 6A | 53.3 |
| wPt-2153        | 6A | 54.2 |
| wPt-5705        | 6A | 54.9 |
| Xfba152a        | 6A | 55.3 |
| Xgpw2082        | 6A | 55.3 |
| wPt-7565        | 6A | 55.6 |
| Xmag1200a       | 6A | 56   |
| XksuH4.2        | 6A | 56.3 |
| wPt-0689a       | 6A | 57   |
| wPt-3524        | 6A | 57   |
| wPt-8117        | 6A | 57   |
| wPt-8256        | 6A | 57   |
| wPt-9759        | 6A | 57.2 |
| Xmxe3M2o        | 6A | 57.4 |
| wPt-9679        | 6A | 57.4 |
| wPt-5652        | 6A | 57.8 |
| wPt-6904        | 6A | 57.8 |

|                 |    |      |
|-----------------|----|------|
| wPt-8848        | 6A | 57.8 |
| Xmwg573         | 6A | 57.9 |
| wPt-7027        | 6A | 58   |
| wPt-8266        | 6A | 58.1 |
| tPt-2833        | 6A | 58.5 |
| tPt-0877        | 6A | 58.9 |
| XS13M62(220)    | 6A | 59   |
| P38/M50-4       | 6A | 59.3 |
| Xmag4048        | 6A | 60.4 |
| Xgwm1040        | 6A | 61.6 |
| Xmwg573a        | 6A | 62.3 |
| Xpsr10(Gli-2).2 | 6A | 62.3 |
| wPt-7663        | 6A | 62.5 |
| P31/M54-5       | 6A | 63.3 |
| P33/M54-8       | 6A | 63.3 |
| P42/M50-4       | 6A | 63.3 |
| Xabg378a        | 6A | 63.3 |
| Xpsr949b        | 6A | 63.5 |
| CA681959a       | 6A | 64.3 |
| P41/M49-126     | 6A | 65.2 |
| Xutv1034        | 6A | 65.7 |
| wPt-9692        | 6A | 66.2 |
| wPt-3803        | 6A | 67   |
| P35/M61-4       | 6A | 67.3 |
| wPt-2822        | 6A | 67.3 |
| Xbarc206        | 6A | 67.6 |
| wPt-10629       | 6A | 67.6 |
| wPt-0259a       | 6A | 67.7 |
| wPt-3605a       | 6A | 67.7 |
| wPt-9584        | 6A | 67.8 |
| wPt-10558       | 6A | 67.9 |
| wPt-11347       | 6A | 67.9 |
| tPt-6278        | 6A | 68.2 |
| wPt-7486        | 6A | 68.2 |
| wPt-9205        | 6A | 68.2 |
| wPt-0338        | 6A | 68.5 |
| wPt-3965        | 6A | 68.6 |
| wPt-7623        | 6A | 68.8 |
| P38/M59-85      | 6A | 73.7 |
| Xcdo1315        | 6A | 73.7 |
| P33/M52-1       | 6A | 76.7 |
| wPt-7127        | 6A | 77.7 |
| Xcdo270.1       | 6A | 77.8 |
| wPt-9113        | 6A | 79.6 |
| Gli-A2          | 6A | 79.7 |

|              |    |      |
|--------------|----|------|
| P38/M59-122  | 6A | 80.4 |
| P39/M49-174  | 6A | 80.4 |
| P40/M60-153  | 6A | 80.4 |
| P41/M61-5    | 6A | 80.4 |
| wPt-7906     | 6A | 81.3 |
| XksuH4       | 6A | 81.8 |
| TC84464      | 6A | 82   |
| Xgwm825      | 6A | 82   |
| Xgpw2216     | 6A | 82.2 |
| Xgwm494a     | 6A | 82.2 |
| BE427655     | 6A | 82.3 |
| TC85125      | 6A | 82.6 |
| CA716967     | 6A | 82.7 |
| NP234852     | 6A | 83   |
| Xfba148      | 6A | 83.2 |
| csHPLC3      | 6A | 83.2 |
| BQ246417     | 6A | 83.8 |
| XE5M5p_R     | 6A | 84.2 |
| Xwmc630      | 6A | 84.4 |
| Xutv1035     | 6A | 84.9 |
| TC85303b     | 6A | 85.1 |
| Xgwm497      | 6A | 85.5 |
| Xgwm1009     | 6A | 85.7 |
| wPt-3091     | 6A | 86.8 |
| wPt-5931a    | 6A | 87.3 |
| wPt-7599a    | 6A | 87.3 |
| wPt-8833a    | 6A | 87.3 |
| TC84481a     | 6A | 87.4 |
| wPt-7445     | 6A | 87.6 |
| BJ261821     | 6A | 87.8 |
| XS25M60(380) | 6A | 88   |
| wPt-5834     | 6A | 88   |
| Xfba85       | 6A | 88.2 |
| Xpsr627      | 6A | 88.2 |
| wPt-0959a    | 6A | 88.6 |
| Xbarc23      | 6A | 88.7 |
| wPt-2563     | 6A | 89   |
| wPt-0139     | 6A | 89.1 |
| Xmag1200b    | 6A | 89.6 |
| wPt-0357a    | 6A | 90.1 |
| XP39M37(250) | 6A | 90.7 |
| Xmgb339      | 6A | 91.9 |
| wPt-9829     | 6A | 91.9 |
| wPt-10645    | 6A | 92   |
| wPt-11607    | 6A | 92.1 |



|           |    |       |
|-----------|----|-------|
| P36/M47-6 | 6A | 92.4  |
| Xwmc182   | 6A | 93    |
| Xutv707   | 6A | 93.3  |
| P33/M54-3 | 6A | 94    |
| P35/M48-3 | 6A | 94    |
| P38/M61-7 | 6A | 94    |
| P41/M50-5 | 6A | 94    |
| Xpsr312   | 6A | 94.1  |
| Xmag1415  | 6A | 94.3  |
| Xfba234.1 | 6A | 95    |
| Xfbb145a  | 6A | 95    |
| BF483631  | 6A | 95.5  |
| Xutv1471  | 6A | 96    |
| Xbarc37   | 6A | 96.7  |
| Xrsq805   | 6A | 97.5  |
| Xgwm82    | 6A | 97.6  |
| Xgwm786   | 6A | 97.9  |
| Xbarc48   | 6A | 98    |
| Xbarc146  | 6A | 98.1  |
| Xwmc753   | 6A | 98.1  |
| Xwmc243   | 6A | 98.1  |
| Xbarc195  | 6A | 98.3  |
| Xcfd190   | 6A | 98.5  |
| Xcfd80    | 6A | 98.5  |
| Xwmc398   | 6A | 98.6  |
| wPt-5311  | 6A | 99    |
| Xwmc672   | 6A | 99.2  |
| Xutv1469  | 6A | 99.4  |
| Xbarc171  | 6A | 99.5  |
| Xpsp3152  | 6A | 101.5 |
| P31/M50-2 | 6A | 102.5 |
| Xcdo29    | 6A | 102.5 |
| Xgpw1150  | 6A | 102.5 |
| Xgpw2118c | 6A | 102.5 |
| Xwmc145   | 6A | 103.3 |
| Xfbb95a   | 6A | 103.4 |
| Xgwm356   | 6A | 103.9 |
| Xwmc748   | 6A | 104.1 |
| Xwmc786   | 6A | 104.2 |
| Xwmc150   | 6A | 104.7 |
| Xwmc256   | 6A | 104.7 |
| Xwmc807   | 6A | 105.3 |
| Xgbx3321a | 6A | 105.5 |
| XgbxG549  | 6A | 106.5 |
| XgbxG728  | 6A | 106.5 |

|                 |    |       |
|-----------------|----|-------|
| Xbarc3          | 6A | 107.9 |
| Xbarc113        | 6A | 108.4 |
| XgbxR004        | 6A | 108.4 |
| Xcfd82          | 6A | 109.4 |
| Xbarc107        | 6A | 110.4 |
| Xpsr463         | 6A | 111.4 |
| XWB003df        | 6A | 112.4 |
| M60/P64.2       | 6A | 114.4 |
| M85/P65.3       | 6A | 114.4 |
| P40/M47-6       | 6A | 114.4 |
| Pm31            | 6A | 114.4 |
| XWB171f         | 6A | 114.4 |
| Xcdo1428        | 6A | 114.4 |
| Xrsq805.1(Embp) | 6A | 114.4 |
| Xpsp3029.1      | 6A | 115.4 |
| Xpsp3071        | 6A | 115.4 |
| Xbcd506x        | 6A | 116.4 |
| Xfba397         | 6A | 116.4 |
| Xfbb95b         | 6A | 116.4 |
| Xgwm494b        | 6A | 116.4 |
| Xmta11          | 6A | 116.4 |
| Xwmc335         | 6A | 116.5 |
| P37/M47-6       | 6A | 117.2 |
| Xfbb215         | 6A | 117.2 |
| Xbarc204        | 6A | 118.2 |
| Xgpw2222        | 6A | 118.2 |
| P41/M48-304     | 6A | 119.2 |
| Xbcd758         | 6A | 119.2 |
| Xfba367         | 6A | 119.2 |
| Xfbb192         | 6A | 119.2 |
| Xfbb283b        | 6A | 120.2 |
| Xbcd1860        | 6A | 121.2 |
| Xcdo204         | 6A | 121.2 |
| Xcfd30          | 6A | 122.2 |
| XR61            | 6A | 123.2 |
| Xtam36          | 6A | 123.2 |
| Xpsr915         | 6A | 123.2 |
| Xwmc684         | 6A | 123.2 |
| Xcdo772         | 6A | 124.2 |
| Xwmc1           | 6A | 124.2 |
| Xfbb170         | 6A | 126.2 |
| Xgpw2060b       | 6A | 126.2 |
| S23M15_1        | 6A | 128.2 |
| Xcdo1373        | 6A | 128.2 |
| Xwmc201         | 6A | 129.2 |

|                 |    |       |
|-----------------|----|-------|
| Xpsr142         | 6A | 129.9 |
| Xcdo388         | 6A | 130.1 |
| Xgwm907         | 6A | 130.2 |
| Xgwm132         | 6A | 130.4 |
| Xmtd11b         | 6A | 131   |
| Xwmc179j        | 6A | 132   |
| Xcsb112.1(Dhn5) | 6A | 133   |
| Xmwg934b        | 6A | 134   |
| Xfbb164a        | 6A | 136   |
| Xgwm570         | 6A | 136   |
| tPt-4209        | 6A | 136.2 |
| Xabc175b        | 6A | 136.7 |
| Xwmc553         | 6A | 137.2 |
| wPt-7063        | 6A | 137.8 |
| Xwmc179         | 6A | 139.5 |
| Xwmc163         | 6A | 140.1 |
| wPt-8331        | 6A | 144   |
| Xfba111b        | 6A | 162.3 |
| wPt-3191a       | 6A | 165.4 |
| wPt-11612       | 6A | 171.7 |
| Xwmc417a        | 6A | 172.5 |
| tPt-3786        | 6A | 173.1 |
| Xcdo1091a       | 6A | 176.2 |
| Xbarc104        | 6A | 177.2 |
| Xcfa2114        | 6A | 179.2 |
| Xgwm169         | 6A | 179.2 |
| Xfbb221         | 6A | 182.2 |
| Xwmc417         | 6A | 182.3 |
| P31/M48-3       | 6A | 183.2 |
| Xfbb70c         | 6A | 183.2 |
| Xdupw167        | 6A | 184   |
| Xfbb82b         | 6A | 184.2 |
| Xgbx4071        | 6A | 185.2 |
| Xgpw2344        | 6A | 185.2 |
| S23M15_8        | 6A | 186.2 |
| Xfbb191         | 6A | 186.2 |
| XksuD12b        | 6A | 186.2 |
| Xopa7-520       | 6A | 186.2 |
| Xwmc580         | 6A | 186.4 |
| S13M25_5        | 6A | 187.1 |
| Xfba20          | 6A | 187.1 |
| Xfba8           | 6A | 187.1 |
| Xfbb40.1        | 6A | 187.1 |
| tPt-7761        | 6A | 187.3 |
| wPt-8373        | 6A | 187.5 |

|             |    |       |
|-------------|----|-------|
| wPt-11668   | 6A | 187.9 |
| S23M15_6    | 6A | 188.1 |
| XksuG49b    | 6A | 188.1 |
| wPt-2877    | 6A | 188.5 |
| P35/M48-1   | 6A | 188.7 |
| Xgwm427     | 6A | 188.7 |
| wPt-6678    | 6A | 189   |
| wPt-7655    | 6A | 189.2 |
| S12M26_9    | 6A | 190.1 |
| S13M14_9    | 6A | 190.1 |
| Xbcd1510b   | 6A | 190.1 |
| tPt-6661    | 6A | 190.5 |
| Xgwm617     | 6A | 191   |
| Xwmc642     | 6A | 192.2 |
| wPt-6995    | 6A | 194   |
| wPt-7390    | 6A | 194   |
| wPt-5572    | 6A | 194.2 |
| wPt-1375    | 6A | 194.8 |
| S12M15_9    | 6A | 195.3 |
| S18M17_3    | 6A | 195.3 |
| XksuD27     | 6A | 195.3 |
| Xcdo836     | 6A | 195.8 |
| P35/M47-14  | 6A | 197   |
| P39/M49-238 | 6A | 197   |
| Xpsr546a    | 6A | 197   |
| wPt-0938    | 6A | 200   |
| wPt-4229    | 6A | 200   |
| wPt-8944    | 6A | 200   |
| wPt-9474    | 6A | 200.2 |
| F133        | 6A | 200.3 |
| P35/M57-4   | 6A | 200.7 |
| P40/M55-1   | 6A | 200.7 |
| Xmwg2053    | 6A | 200.7 |
| wPt-1661    | 6A | 200.7 |
| wPt-4445    | 6A | 200.7 |
| wPt-5331    | 6A | 200.7 |
| wPt-5696    | 6A | 200.7 |
| wPt-5787    | 6A | 200.7 |
| P41/M51-316 | 6A | 201.7 |
| P41/M58-90  | 6A | 201.7 |
| Xmwg573b    | 6A | 201.7 |
| Xmwg798     | 6A | 201.7 |
| wPt-2975    | 6A | 201.9 |
| wPt-8439    | 6A | 202.4 |
| wPt-9976    | 6A | 202.4 |

|           |    |       |
|-----------|----|-------|
| S13M15_6  | 6A | 203.3 |
| Xgpw7388  | 6A | 204.7 |
| wPt-1642  | 6A | 205   |
| Swes953   | 6A | 205.6 |
| wPt-8954  | 6A | 205.9 |
| wPt-6829  | 6A | 206.3 |
| P31/M48-1 | 6A | 206.5 |
| MIRE      | 6A | 208.1 |
| Xgwm999   | 6A | 208.3 |
| Sr26      | 6A | 208.5 |
| Xgwm1089  | 6A | 208.7 |
| wPt-2632  | 6A | 209.8 |
| P31/M53-2 | 6A | 211   |
| wPt-8773  | 6A | 213.2 |
| P33/M52-8 | 6A | 214   |
| Xwmc621   | 6A | 216.2 |
| Xwmc206   | 6A | 216.3 |
| P38/M51-4 | 6A | 218.8 |
| Xwmc254   | 6A | 254.3 |
| Xwmc59    | 6A | 263.3 |
| wPt-9690  | 6B | 0     |
| wPt-2573  | 6B | 1.2   |
| wPt-0357b | 6B | 4.5   |
| wPt-5931b | 6B | 5.2   |
| wPt-8833b | 6B | 5.2   |
| wPt-7599b | 6B | 7.2   |
| wPt-0959b | 6B | 14.6  |
| Xwmc430   | 6B | 33.8  |
| wPt-2991  | 6B | 34.5  |
| wPt-6154  | 6B | 35.7  |
| wPt-3774  | 6B | 36.8  |
| wPt-7662  | 6B | 36.8  |
| Xgwm1051  | 6B | 37.8  |
| XksuG8    | 6B | 38    |
| wPt-8894  | 6B | 38.5  |
| wPt-6127  | 6B | 38.6  |
| wPt-0151  | 6B | 38.9  |
| wPt-1089  | 6B | 39    |
| Xdupw217  | 6B | 39.2  |
| wPt-0882  | 6B | 39.2  |
| wPt-6293  | 6B | 39.2  |
| wPt-9406  | 6B | 39.2  |
| wPt-0562b | 6B | 39.3  |
| wPt-9532  | 6B | 39.3  |
| wPt-8641  | 6B | 39.4  |

|           |    |      |
|-----------|----|------|
| tPt-0910  | 6B | 39.5 |
| wPt-0452  | 6B | 39.5 |
| wPt-1558  | 6B | 39.5 |
| wPt-1783  | 6B | 39.5 |
| wPt-1922  | 6B | 39.5 |
| wPt-2102  | 6B | 39.5 |
| wPt-2964  | 6B | 39.5 |
| wPt-3031  | 6B | 39.5 |
| wPt-3053  | 6B | 39.5 |
| wPt-3130  | 6B | 39.5 |
| wPt-4283  | 6B | 39.5 |
| wPt-4386  | 6B | 39.5 |
| wPt-5383  | 6B | 39.5 |
| wPt-6994  | 6B | 39.5 |
| wPt-7150  | 6B | 39.5 |
| wPt-7207  | 6B | 39.5 |
| wPt-8336  | 6B | 39.5 |
| wPt-8563  | 6B | 39.5 |
| wPt-8595  | 6B | 39.5 |
| wPt-9015  | 6B | 39.5 |
| wPt-9468  | 6B | 39.5 |
| wPt-9990  | 6B | 39.5 |
| tPt-2055  | 6B | 39.6 |
| wPt-0245  | 6B | 39.6 |
| wPt-2689  | 6B | 39.6 |
| wPt-4520  | 6B | 39.6 |
| wPt-3800  | 6B | 40   |
| wPt-7203  | 6B | 40   |
| wPt-8239  | 6B | 40   |
| wPt-4678  | 6B | 40.1 |
| wPt-4720  | 6B | 40.3 |
| wPt-1547  | 6B | 40.4 |
| wPt-2714  | 6B | 41   |
| wPt-7343  | 6B | 41   |
| wPt-3116  | 6B | 41.2 |
| wPt-3304  | 6B | 41.2 |
| wPt-5188b | 6B | 41.2 |
| wPt-6282  | 6B | 41.2 |
| wPt-2133  | 6B | 41.4 |
| wPt-1852  | 6B | 41.7 |
| wPt-7777  | 6B | 41.7 |
| wPt-0351  | 6B | 41.9 |
| Xpsr119   | 6B | 42.5 |
| wPt-6988  | 6B | 42.7 |
| wPt-1474  | 6B | 43   |

|              |    |      |
|--------------|----|------|
| wPt-8015     | 6B | 43.8 |
| wPt-4233     | 6B | 45.8 |
| wPt-4706     | 6B | 46.3 |
| wPt-7954     | 6B | 47.4 |
| wPt-1437     | 6B | 49.1 |
| wPt-2095     | 6B | 49.1 |
| wPt-3424     | 6B | 49.1 |
| wPt-9487     | 6B | 49.4 |
| Xgwm131      | 6B | 49.8 |
| wPt-3118     | 6B | 50.1 |
| XP39M37(680) | 6B | 50.4 |
| wPt-4900     | 6B | 50.5 |
| wPt-9492     | 6B | 50.6 |
| wPt-6916     | 6B | 50.8 |
| wPt-6653     | 6B | 50.9 |
| wPt-4564     | 6B | 51.2 |
| wPt-1725     | 6B | 51.3 |
| Xgwm613a     | 6B | 55.8 |
| wPt-0259b    | 6B | 57.7 |
| Xwmc419      | 6B | 59.2 |
| wPt-3376     | 6B | 59.6 |
| Xwmc486      | 6B | 60   |
| XS13M50(390) | 6B | 60.8 |
| wPt-2432     | 6B | 60.9 |
| wPt-5256     | 6B | 61.5 |
| Xbarc76b     | 6B | 61.7 |
| Xbarc76      | 6B | 61.9 |
| wPt-1241     | 6B | 62.3 |
| wPt-8814     | 6B | 62.8 |
| wPt-3605b    | 6B | 63.2 |
| wPt-2786     | 6B | 64   |
| wPt-2175     | 6B | 64.7 |
| Xwmc487      | 6B | 65.2 |
| wPt-7745     | 6B | 65.2 |
| XksuH4       | 6B | 65.6 |
| wPt-4858     | 6B | 65.8 |
| Gli-B2       | 6B | 67.1 |
| S25M19_7     | 6B | 67.2 |
| Xgpw93017    | 6B | 67.9 |
| Xcfd13a      | 6B | 68   |
| wPt-8153     | 6B | 68.1 |
| TC85035      | 6B | 68.4 |
| Xbarc18      | 6B | 68.9 |
| S18M13_3     | 6B | 78   |
| S25M19_9     | 6B | 80   |

|               |    |      |
|---------------|----|------|
| S25M19_6      | 6B | 83   |
| Xgwm132       | 6B | 87   |
| Xgwm613b      | 6B | 87   |
| wPt-6942      | 6B | 87   |
| Xpsr167a(Hpr) | 6B | 88   |
| S24M17_1      | 6B | 91   |
| Xgpw1079      | 6B | 91   |
| Xcdo476.2     | 6B | 92   |
| Xgwm705       | 6B | 92.1 |
| Xwmc104       | 6B | 92.1 |
| wPt-2297      | 6B | 92.2 |
| wPt-0470      | 6B | 92.5 |
| wPt-3309      | 6B | 93.1 |
| wPt-5333      | 6B | 93.1 |
| wPt-4742      | 6B | 93.3 |
| wPt-9971      | 6B | 93.8 |
| BJ236800      | 6B | 93.9 |
| wPt-0554      | 6B | 94   |
| CA741546      | 6B | 94.2 |
| wPt-7540      | 6B | 94.3 |
| Xcfd1         | 6B | 94.4 |
| XS13M61(290)  | 6B | 94.5 |
| wPt-2479      | 6B | 94.6 |
| wPt-9667      | 6B | 94.6 |
| wPt-1788      | 6B | 94.8 |
| wPt-2587      | 6B | 94.8 |
| Xak466.1(Nra) | 6B | 95.2 |
| Xcdo1315      | 6B | 95.2 |
| tPt-2451      | 6B | 95.3 |
| wPt-3163      | 6B | 95.7 |
| TC85303a      | 6B | 96   |
| S23M15_6      | 6B | 96.1 |
| XgbxG084      | 6B | 96.1 |
| wPt-1185      | 6B | 97   |
| XS25M49(120)  | 6B | 97.2 |
| wPt-2218      | 6B | 97.3 |
| TC85307       | 6B | 97.6 |
| Xutv1280      | 6B | 97.9 |
| wPt-9594      | 6B | 97.9 |
| Xfba344       | 6B | 98.5 |
| XgbxG103      | 6B | 98.6 |
| Xpsr312       | 6B | 98.9 |
| TC85037       | 6B | 99.3 |
| S12M17_10     | 6B | 99.5 |
| Xpsr136       | 6B | 99.5 |



|           |    |       |
|-----------|----|-------|
| S23M15_9  | 6B | 100.5 |
| S23M25_3  | 6B | 100.5 |
| S23M26_1  | 6B | 100.5 |
| S23M26_2  | 6B | 100.5 |
| Xgbx3165a | 6B | 100.5 |
| XgpwE1    | 6B | 100.5 |
| TC84481b  | 6B | 101   |
| TC65966   | 6B | 101.3 |
| S12M17_9  | 6B | 101.4 |
| XgbxG083  | 6B | 101.4 |
| wPt-0052  | 6B | 102   |
| wPt-8194  | 6B | 102   |
| Xbcd342A  | 6B | 102.3 |
| Nor2      | 6B | 102.3 |
| wPt-7846  | 6B | 102.4 |
| wPt-9659  | 6B | 104   |
| Xubp74    | 6B | 104.2 |
| wPt-10467 | 6B | 104.2 |
| TC80528a  | 6B | 104.7 |
| M51/P65.1 | 6B | 104.9 |
| P78/M63.1 | 6B | 104.9 |
| S13M15_11 | 6B | 104.9 |
| S23M20_14 | 6B | 104.9 |
| Xbarc48   | 6B | 104.9 |
| wPt-3666  | 6B | 105.2 |
| Pm27      | 6B | 105.9 |
| Xpsp3131  | 6B | 105.9 |
| Xbarc68   | 6B | 106   |
| S24M15_9  | 6B | 106.7 |
| Xcdo365   | 6B | 106.7 |
| S25M14_3  | 6B | 107.7 |
| Gpc-B1    | 6B | 108.2 |
| Xgdm113   | 6B | 110.7 |
| Xwmc95    | 6B | 110.7 |
| Xgwm518   | 6B | 111.4 |
| S13M25_2  | 6B | 112.4 |
| S12M17_3  | 6B | 114.4 |
| wPt-1700  | 6B | 114.8 |
| XksuD17   | 6B | 115.1 |
| Xwmc597   | 6B | 115.6 |
| Xrz995    | 6B | 116.1 |
| Xwmc494   | 6B | 116.1 |
| wPt-7489  | 6B | 116.1 |
| XgpwE3    | 6B | 117.1 |
| Xbcd20C   | 6B | 120.1 |

|           |    |       |
|-----------|----|-------|
| Xcdo270   | 6B | 120.1 |
| wPt-8721  | 6B | 120.9 |
| Xbcd1407a | 6B | 121   |
| Xcdo1473  | 6B | 122   |
| Xfbb16    | 6B | 122   |
| wPt-3733  | 6B | 123   |
| Xbcd2014a | 6B | 124.7 |
| Xfba152   | 6B | 124.7 |
| Xpsp3009  | 6B | 124.7 |
| Xtam60    | 6B | 124.7 |
| Xgpw2060a | 6B | 126.7 |
| Xgwm816   | 6B | 126.7 |
| Xgwm508   | 6B | 126.7 |
| wPt-3606  | 6B | 126.8 |
| BJ213673b | 6B | 128.3 |
| Xgwm191   | 6B | 128.3 |
| S12M26_7  | 6B | 128.7 |
| Xcdo507a  | 6B | 128.7 |
| Xfba357   | 6B | 128.7 |
| Xrz273    | 6B | 128.7 |
| Xwg908.1  | 6B | 128.7 |
| Xfbb61    | 6B | 128.8 |
| wPt-0446  | 6B | 129.2 |
| wPt-9784  | 6B | 129.2 |
| Xwmc265   | 6B | 129.7 |
| Xwmc737   | 6B | 129.8 |
| S12M26_6  | 6B | 129.8 |
| XgbxG176  | 6B | 129.8 |
| Xwmc398   | 6B | 130.7 |
| Xgwm193a  | 6B | 130.9 |
| CA594434b | 6B | 131   |
| wPt-3060  | 6B | 131.2 |
| S12M18_2  | 6B | 131.5 |
| Xgwm133   | 6B | 131.5 |
| Xgwm644a  | 6B | 132.8 |
| wPt-8183  | 6B | 133.2 |
| M86/P65.5 | 6B | 133.7 |
| P78/M72.7 | 6B | 133.7 |
| Xwmc388   | 6B | 133.7 |
| Xfba345a  | 6B | 134.7 |
| Xbcd1383a | 6B | 135.7 |
| Xpsr141a  | 6B | 135.7 |
| Xgwm361   | 6B | 135.7 |
| S23M25_10 | 6B | 136.7 |
| Xcdo1421  | 6B | 136.7 |

|              |    |       |
|--------------|----|-------|
| Xcdo524      | 6B | 136.7 |
| wPt-2000     | 6B | 136.9 |
| Xwmc397      | 6B | 137   |
| Xwmc756      | 6B | 137   |
| Xwmc105      | 6B | 137.1 |
| Xgwm88       | 6B | 137.8 |
| XS25M55(600) | 6B | 137.9 |
| BF202619-86  | 6B | 138   |
| Xgwm273      | 6B | 138   |
| Xwmc179      | 6B | 138   |
| Xwmc473      | 6B | 138   |
| Xgwm58       | 6B | 138   |
| wPt-2564     | 6B | 138   |
| wPt-7935     | 6B | 138   |
| Xgwm70       | 6B | 138.7 |
| Xbcd102.1    | 6B | 140.7 |
| XgbxG138     | 6B | 140.7 |
| Xgwm518b     | 6B | 140.7 |
| Xbcd1398     | 6B | 141.1 |
| Xbarc146     | 6B | 141.2 |
| TC101037     | 6B | 141.3 |
| Xfba328a     | 6B | 141.4 |
| Xwmc182      | 6B | 141.4 |
| Pm12         | 6B | 141.7 |
| Xbarc198     | 6B | 141.7 |
| Xcfa2110     | 6B | 142   |
| Xwmc726      | 6B | 142.2 |
| Xwmc79       | 6B | 142.4 |
| Xbcd1299a    | 6B | 142.7 |
| Xgwm191.1    | 6B | 142.7 |
| XksuH14a     | 6B | 142.7 |
| Xpsp3118     | 6B | 142.7 |
| Xgwm311      | 6B | 142.7 |
| Xgwm608      | 6B | 143   |
| XWB101ib     | 6B | 144   |
| Xrz476a      | 6B | 144   |
| M85/P65.6    | 6B | 145   |
| Xfba67a      | 6B | 145   |
| Xwmc105y     | 6B | 145   |
| Xwmc387      | 6B | 145   |
| Xcnl3c       | 6B | 146   |
| Xfba399      | 6B | 146   |
| P40/M56-2    | 6B | 147   |
| P41/M47-1    | 6B | 147   |
| P41/M58-206  | 6B | 147   |

|             |    |       |
|-------------|----|-------|
| Xbcd1716    | 6B | 147   |
| Xbcd357     | 6B | 147   |
| Xmwg900a    | 6B | 147   |
| S18M17_1    | 6B | 148   |
| Xfba359     | 6B | 148   |
| rPt-1040    | 6B | 148.2 |
| wPt-2424    | 6B | 148.3 |
| Xwmc748     | 6B | 148.8 |
| wPt-5037    | 6B | 148.8 |
| wPt-9124    | 6B | 148.8 |
| M65/P64.1   | 6B | 149   |
| Nor-B2      | 6B | 149   |
| Xwmc786     | 6B | 149.3 |
| M65/P64.10  | 6B | 149.9 |
| S23M26_6    | 6B | 149.9 |
| Xbcd1299b   | 6B | 149.9 |
| Xbcd1495    | 6B | 149.9 |
| XAhas       | 6B | 150.9 |
| Xcfd13b     | 6B | 150.9 |
| Xpsr8(Cxp3) | 6B | 150.9 |
| Xbcd1426    | 6B | 150.9 |
| P34/M51-229 | 6B | 151.9 |
| Xbcd2014b   | 6B | 151.9 |
| Xgbx3321b   | 6B | 151.9 |
| Xgwm133b    | 6B | 151.9 |
| P78/M39.5   | 6B | 152.9 |
| P78/M71.3   | 6B | 152.9 |
| Xgwm325     | 6B | 152.9 |
| Xisu97      | 6B | 152.9 |
| P32/M51-6   | 6B | 153.9 |
| P36/M50-2   | 6B | 153.9 |
| Xfbb364     | 6B | 153.9 |
| Xpsr908     | 6B | 153.9 |
| Yr36        | 6B | 153.9 |
| P78/M87.5a  | 6B | 154.9 |
| Xcdo507b    | 6B | 154.9 |
| Xgbx3327    | 6B | 154.9 |
| Xgpw1017    | 6B | 154.9 |
| Xpsr167     | 6B | 154.9 |
| Xbarc127    | 6B | 155.2 |
| Xwmc539     | 6B | 155.5 |
| Xglk479     | 6B | 155.8 |
| P41/M47-2   | 6B | 156.8 |
| P41/M48-136 | 6B | 156.8 |
| XksuG8a     | 6B | 156.8 |

|                |    |       |
|----------------|----|-------|
| XuaWM1.1       | 6B | 156.8 |
| QHtap.wsu-6B.1 | 6B | 157.8 |
| Xbcd1407b      | 6B | 157.8 |
| Xwg232b        | 6B | 157.8 |
| Xgwm644b       | 6B | 157.8 |
| Xbcd1398b      | 6B | 158.8 |
| P41/M58-260    | 6B | 159.8 |
| Xwg286         | 6B | 159.8 |
| Xgwm626        | 6B | 159.8 |
| S23M14_5       | 6B | 160.8 |
| S24M17_5       | 6B | 160.8 |
| Xcdo772        | 6B | 161.8 |
| Xgwm887        | 6B | 162   |
| Xpsr915        | 6B | 162.5 |
| CA677684b      | 6B | 162.6 |
| wPt-3191b      | 6B | 162.6 |
| wPt-0397       | 6B | 162.7 |
| tPt-9048       | 6B | 163.4 |
| wPt-1761       | 6B | 163.6 |
| wPt-9241       | 6B | 163.6 |
| Xwmc152        | 6B | 163.7 |
| F138           | 6B | 163.9 |
| wPt-2582       | 6B | 163.9 |
| wPt-3581       | 6B | 163.9 |
| wPt-9881       | 6B | 163.9 |
| wPt-2162       | 6B | 164   |
| Xbarc79        | 6B | 164.7 |
| Xbarc354       | 6B | 165.3 |
| Xgwm193b       | 6B | 165.3 |
| Xpsp3112.2     | 6B | 165.3 |
| wPt-8508       | 6B | 165.3 |
| wPt-8554       | 6B | 165.3 |
| P33/M52-3      | 6B | 166.3 |
| Xpsr141g       | 6B | 166.3 |
| Xbcd1383b      | 6B | 167.3 |
| Xabc175a       | 6B | 168.3 |
| XksuH14b       | 6B | 168.3 |
| P34/M51-219    | 6B | 169.3 |
| P35/M49-4      | 6B | 169.3 |
| Xfba328b       | 6B | 169.3 |
| Xfba345b       | 6B | 169.3 |
| Xfba67b        | 6B | 170.3 |
| wPt-1730       | 6B | 170.6 |
| Xwmc182b       | 6B | 171.3 |
| Xgwm107        | 6B | 171.4 |

|                      |    |       |
|----------------------|----|-------|
| wPt-4924             | 6B | 171.4 |
| Xfbb156b             | 6B | 172.2 |
| Xgbx3213             | 6B | 172.2 |
| wPt-1287             | 6B | 172.8 |
| Xmwig934a            | 6B | 173.1 |
| wPt-7627             | 6B | 173.2 |
| P78/M43.13           | 6B | 174.1 |
| Xcdo341b             | 6B | 174.1 |
| Xgwm907              | 6B | 175   |
| Xwg341               | 6B | 175   |
| Xbarc24              | 6B | 176   |
| P35/M61-2            | 6B | 177   |
| Xpsr2(alpha-Amy-1).1 | 6B | 177   |
| XWB178m              | 6B | 178   |
| Xbarc178             | 6B | 178   |
| Xfba42               | 6B | 179   |
| P40/M61-1            | 6B | 180   |
| Xgpw1014             | 6B | 180   |
| XksuG30              | 6B | 180   |
| Xabg473.2            | 6B | 181   |
| Xfbb130              | 6B | 181   |
| Xcdo1091b            | 6B | 182   |
| Xfbb164c             | 6B | 183   |
| Xgwm570              | 6B | 183   |
| Xfbb169x             | 6B | 184   |
| Xdupw216             | 6B | 184.8 |
| XksuG12              | 6B | 185.8 |
| Xwmc417              | 6B | 186.1 |
| Xfbb377c             | 6B | 186.9 |
| Xgwm963              | 6B | 188.5 |
| S13M14_10            | 6B | 188.7 |
| Xfbb57               | 6B | 188.7 |
| Xcdo836              | 6B | 189.7 |
| Xpsr546b             | 6B | 190.7 |
| Xfba111              | 6B | 191   |
| Xgwm219              | 6B | 191   |
| wPt-9930             | 6B | 192.6 |
| Xfbb327              | 6B | 192.9 |
| Xfbb359b             | 6B | 192.9 |
| P32/M54-2            | 6B | 193.9 |
| Xwmc417b             | 6B | 194.9 |
| Xbarc361             | 6B | 195   |
| P38/M50-1            | 6B | 196.1 |
| XWD124               | 6B | 196.1 |
| wPt-6441             | 6B | 196.3 |

|            |    |       |
|------------|----|-------|
| Xgwm889    | 6B | 196.4 |
| Xfbb251x   | 6B | 197.1 |
| Xgwm768    | 6B | 197.6 |
| wPt-9270   | 6B | 198   |
| P78/M63.3a | 6B | 198.1 |
| Xfba127    | 6B | 198.1 |
| Xfbb221b   | 6B | 199.1 |
| Xfbb82a    | 6B | 199.1 |
| wPt-7830a  | 6B | 200   |
| Xmwg74     | 6B | 200.1 |
| tPt-9948a  | 6B | 200.8 |
| Xfbb250b   | 6B | 201.1 |
| PmG3M      | 6B | 201.2 |
| wPt-1048   | 6B | 201.3 |
| wPt-8418b  | 6B | 201.3 |
| wPt-6184   | 6B | 201.5 |
| tPt-6794   | 6B | 202.2 |
| wPt-5092   | 6B | 202.2 |
| wPt-5101   | 6B | 202.2 |
| wPt-5257   | 6B | 202.2 |
| Xfbb70.2   | 6B | 202.5 |
| Xfba251    | 6B | 203.5 |
| Xfbb59c    | 6B | 203.5 |
| wPt-7274   | 6B | 204   |
| wPt-8149   | 6B | 204.2 |
| wPt-2523   | 6B | 204.3 |
| wPt-3059   | 6B | 204.3 |
| wPt-6967   | 6B | 204.3 |
| wPt-8043   | 6B | 204.3 |
| wPt-3572a  | 6B | 204.4 |
| Xgwm608b   | 6B | 204.5 |
| Xmwg2053a  | 6B | 204.5 |
| wPt-1885   | 6B | 204.5 |
| wPt-9481   | 6B | 204.7 |
| Xbarc134   | 6B | 204.8 |
| wPt-2178   | 6B | 205.5 |
| Xgwm735    | 6B | 206   |
| wPt-9952   | 6B | 209.8 |
| wPt-1325   | 6B | 212   |
| S24M15_4   | 6B | 236.7 |
| wPt-6329   | 6B | 251.3 |
| wPt-0171   | 6B | 255.1 |
| wPt-1264   | 6B | 256.4 |
| wPt-3045   | 6B | 256.4 |
| wPt-5885   | 6B | 256.4 |

|                |    |       |
|----------------|----|-------|
| wPt-9423c      | 6B | 256.4 |
| wPt-5480       | 6B | 260   |
| wPt-5176       | 6B | 261.5 |
| wPt-1541       | 6B | 264   |
| XWC0049t       | 6D | 0     |
| Xpsr889        | 6D | 0     |
| P31/M51-1      | 6D | 6     |
| P40/M51-7      | 6D | 6     |
| Xpsp3200       | 6D | 6     |
| Xpsr899b       | 6D | 6     |
| Xbcd1821.2     | 6D | 7     |
| Xgbx3165b      | 6D | 9     |
| D1.1_ctg3913   | 6D | 10    |
| D1.1_ctg6315   | 6D | 10    |
| Xbcd342.3      | 6D | 10    |
| Xbcd1821a      | 6D | 11    |
| Xabg466        | 6D | 12    |
| Xcfd49         | 6D | 15    |
| Xbarc183       | 6D | 18.1  |
| Xcfd135        | 6D | 20.1  |
| Xfba307.2      | 6D | 23.1  |
| Xbarc173       | 6D | 26.1  |
| Xcfd213a       | 6D | 28.1  |
| D1.1_ctg5153   | 6D | 32.1  |
| Xgwm132        | 6D | 32.1  |
| Xpsr964        | 6D | 32.1  |
| Xcfd75         | 6D | 33.5  |
| XWB173t        | 6D | 33.9  |
| Xgdm132        | 6D | 34.5  |
| XCp3.1         | 6D | 36.5  |
| Stb3           | 6D | 40.5  |
| XksuG48        | 6D | 40.5  |
| Xfbb130a       | 6D | 45.5  |
| Xmwg549.2      | 6D | 47.5  |
| D1.1_ctg7312   | 6D | 49.5  |
| D1.1_ctg9360   | 6D | 49.5  |
| Xfba1          | 6D | 49.5  |
| Xcfd13         | 6D | 49.5  |
| Xcfd1          | 6D | 51.3  |
| Xcfd42         | 6D | 52.1  |
| Xgwm469        | 6D | 53.5  |
| Xwmc749        | 6D | 55.2  |
| D1.1_ctg4968_1 | 6D | 55.5  |
| Xfba85.2       | 6D | 55.5  |
| H13            | 6D | 56.5  |



|              |    |      |
|--------------|----|------|
| Xcfd213b     | 6D | 56.5 |
| Xcfd132      | 6D | 56.5 |
| Xgdm141      | 6D | 57.5 |
| Xgpw1034     | 6D | 59.5 |
| XgpwE10      | 6D | 61.5 |
| XgpwE6       | 6D | 61.5 |
| Xfba187      | 6D | 63.5 |
| D1.1_ctg7851 | 6D | 66.5 |
| Xcfd33       | 6D | 66.5 |
| Xfbb319a     | 6D | 66.5 |
| Xfbb354      | 6D | 66.5 |
| D1.1_ctg4968 | 6D | 67.5 |
| Xfba85a      | 6D | 67.5 |
| Xfbb222      | 6D | 69.5 |
| Xbarc54      | 6D | 70.4 |
| Xfbb231a     | 6D | 71.5 |
| Xfbb283a     | 6D | 73.5 |
| Xwmc113x     | 6D | 73.5 |
| Xpsr106      | 6D | 75.5 |
| Xcfd19       | 6D | 76.5 |
| D1.1_ctg57   | 6D | 77.8 |
| Xpsr627      | 6D | 77.8 |
| Xbarc196     | 6D | 77.8 |
| Xmwg916      | 6D | 79.8 |
| Xgwm325      | 6D | 83.3 |
| Xcfd190      | 6D | 85.3 |
| D1.1_ctg2309 | 6D | 85.4 |
| Xcdo270A     | 6D | 85.4 |
| Xwmc416      | 6D | 85.4 |
| Xabc173a     | 6D | 86.4 |
| Xbarc23.1    | 6D | 88.4 |
| Xbarc123     | 6D | 89.4 |
| Xbarc202     | 6D | 89.4 |
| Xfba336      | 6D | 90.4 |
| Xcdo534a     | 6D | 91.4 |
| Xgwm55       | 6D | 91.4 |
| Xbcd1398     | 6D | 92.4 |
| Xgwm133      | 6D | 93.1 |
| Xgpw1101     | 6D | 93.3 |
| Xbarc5       | 6D | 93.5 |
| Xwmc822      | 6D | 93.5 |
| Xgpw304      | 6D | 94.3 |
| D1.1_ctg1399 | 6D | 95.3 |
| D1.1_ctg1580 | 6D | 95.3 |
| D1.1_ctg7974 | 6D | 95.3 |

|                |    |       |
|----------------|----|-------|
| Xgpw1019       | 6D | 95.3  |
| Xpsr371        | 6D | 95.3  |
| Xtam31         | 6D | 95.3  |
| Xbcd1716.2     | 6D | 96.3  |
| Xbcd357.2      | 6D | 96.3  |
| Xcfd188        | 6D | 96.3  |
| Xcfd37         | 6D | 96.3  |
| Xcfd80         | 6D | 96.3  |
| Xwmc753        | 6D | 97.6  |
| Xcfd76         | 6D | 97.7  |
| Xwmc469        | 6D | 97.7  |
| Xcfd219        | 6D | 97.8  |
| PmD57-6D       | 6D | 98.9  |
| Xcfd287        | 6D | 102   |
| QHt.inra-6D    | 6D | 103   |
| D1.1_ctg3200_1 | 6D | 104   |
| D1.1_ctg3888   | 6D | 104   |
| D1.1_ctg5394   | 6D | 104   |
| Xwg933         | 6D | 104   |
| Xcfd47         | 6D | 105   |
| Xgwm582a       | 6D | 106   |
| Xwmc786        | 6D | 106.9 |
| D1.1_ctg3633   | 6D | 107.9 |
| Xabc175        | 6D | 107.9 |
| Xgpw306        | 6D | 107.9 |
| Xwmc748        | 6D | 107.9 |
| P43/M62-1      | 6D | 108.8 |
| Xbarc273       | 6D | 110.8 |
| Xfba381        | 6D | 111.8 |
| Xbarc204       | 6D | 113.8 |
| P40/M56-4      | 6D | 118.3 |
| QGwt.crc-6D    | 6D | 118.3 |
| Xcfd95         | 6D | 118.3 |
| Xbarc175       | 6D | 118.3 |
| D1.1_ctg1630_1 | 6D | 119.3 |
| D1.1_ctg3802_1 | 6D | 119.3 |
| D1.1_ctg3818_1 | 6D | 119.3 |
| D1.1_ctg5856_1 | 6D | 119.3 |
| Xfbb169a       | 6D | 119.3 |
| Xbarc1121      | 6D | 120.3 |
| D1.1_ctg5362   | 6D | 121.3 |
| Xabg20         | 6D | 121.3 |
| Xgwm55b        | 6D | 121.3 |
| Xcdo534b       | 6D | 122.3 |
| Xfba336b       | 6D | 122.3 |

|                 |    |       |
|-----------------|----|-------|
| wPt-2782        | 6D | 122.6 |
| D1.1_ctg2065    | 6D | 123.3 |
| D1.1_ctg835     | 6D | 123.3 |
| D1.1_ctg8667    | 6D | 123.3 |
| Xcmwg669        | 6D | 123.3 |
| Xglk547         | 6D | 124.3 |
| Xabc173b        | 6D | 125.3 |
| Xtam28a         | 6D | 127.3 |
| Xcsb112.2(Dhn5) | 6D | 128.3 |
| wPt-1314        | 6D | 129.7 |
| Xbarc96         | 6D | 131.3 |
| Xfbb231b        | 6D | 131.5 |
| D1.1_ctg3200_2  | 6D | 135.5 |
| Xfba81          | 6D | 135.5 |
| D1.1_ctg9019    | 6D | 140.5 |
| Xcfd38          | 6D | 140.5 |
| XksuE14b        | 6D | 140.5 |
| D1.1_ctg3096    | 6D | 143.5 |
| XksuD1          | 6D | 143.5 |
| Xgpw2232        | 6D | 146.5 |
| Xmtd11a         | 6D | 146.5 |
| Xcdo836a        | 6D | 147.5 |
| Xwmc773         | 6D | 149.3 |
| Xgpw312         | 6D | 149.5 |
| D1.1_ctg1630_2  | 6D | 151.5 |
| D1.1_ctg3802_2  | 6D | 151.5 |
| D1.1_ctg3818_2  | 6D | 151.5 |
| D1.1_ctg5856_2  | 6D | 151.5 |
| Xfbb169b        | 6D | 151.5 |
| Xcfd45          | 6D | 153.5 |
| Xmwg669         | 6D | 154.5 |
| Xfba76          | 6D | 156.5 |
| Xmtd12          | 6D | 156.5 |
| Xopad12         | 6D | 156.5 |
| Xtam28b         | 6D | 157.5 |
| Xcsb112(Dhn5)   | 6D | 158.5 |
| Xbcd1319        | 6D | 160.5 |
| Xgpw362         | 6D | 160.5 |
| Xfba26a         | 6D | 161.5 |
| Xbcd1510a       | 6D | 164.5 |
| Xcfd5           | 6D | 165.5 |
| Xcmwg684a       | 6D | 166.5 |
| Xgbx3317        | 6D | 167.5 |
| P36/M61-90      | 6D | 168.5 |
| Xcdo836b        | 6D | 168.5 |

|              |    |       |
|--------------|----|-------|
| P32/M52-290  | 6D | 169.5 |
| Xbarc21      | 6D | 170.5 |
| XksuD27a     | 6D | 170.5 |
| P34/M47-1    | 6D | 171.5 |
| Xcfd60       | 6D | 171.5 |
| D1.1_ctg6151 | 6D | 172.5 |
| XksuD12a     | 6D | 172.5 |
| D1.1_ctg1004 | 6D | 175.5 |
| D1.1_ctg5649 | 6D | 175.5 |
| Xfbb59a      | 6D | 175.5 |
| Xfbb70b      | 6D | 175.5 |
| XksuE3a      | 6D | 175.5 |
| Xmwg2053c    | 6D | 177.5 |
| XMxE3M8o     | 6D | 180.5 |
| P39/M50-6    | 6D | 187.5 |
| P35/M48-7    | 6D | 200.5 |
| P35/M47-8    | 6D | 201.5 |
| XscuM01      | 6D | 206.5 |
| P40/M47-5    | 6D | 213.5 |
| Xgdm98-6D    | 6D | 218.5 |
| Xgwm666      | 7A | 0     |
| Xfba17       | 7A | 3.8   |
| Xfba321      | 7A | 3.8   |
| Xfba322      | 7A | 3.8   |
| Xfba65s      | 7A | 3.8   |
| Xfbb278d     | 7A | 3.8   |
| XgbxG367b    | 7A | 3.8   |
| XgbxR799b    | 7A | 3.8   |
| Xgpw2107     | 7A | 3.8   |
| Xgpw2233     | 7A | 3.8   |
| Xgpw2297     | 7A | 3.8   |
| Xfba311a     | 7A | 4.8   |
| Xfba72       | 7A | 4.8   |
| Xfba93       | 7A | 4.8   |
| Xfbb121      | 7A | 4.8   |
| Xfbb156c     | 7A | 4.8   |
| Xfbb193      | 7A | 4.8   |
| Xfbb9b       | 7A | 4.8   |
| Xgwm681      | 7A | 4.8   |
| Xgwm233      | 7A | 5.8   |
| Xopai5-650   | 7A | 5.8   |
| Xpsr119a     | 7A | 6.8   |
| Xwmc158      | 7A | 6.9   |
| M83/P65.4    | 7A | 7.7   |
| P78/M69.1    | 7A | 7.7   |

|                |    |      |
|----------------|----|------|
| Xcdo545        | 7A | 7.7  |
| Xpsr563.2      | 7A | 7.7  |
| Xbcd907        | 7A | 8.7  |
| QHt.inra-7A    | 7A | 9.7  |
| Gby            | 7A | 12.7 |
| P78/M63.6      | 7A | 12.7 |
| P78/M72.2      | 7A | 13.7 |
| Xfbb67a        | 7A | 13.7 |
| Xpsr490.3(Ss1) | 7A | 13.7 |
| Xfba127        | 7A | 14.7 |
| Xpsr386.2      | 7A | 14.7 |
| Xfbb186        | 7A | 15.7 |
| XgbxG564a      | 7A | 15.7 |
| Xcdo475        | 7A | 16.7 |
| Xfba109        | 7A | 16.7 |
| Xwmc388        | 7A | 16.7 |
| M65/P64.2a     | 7A | 17.7 |
| Xglk61.2       | 7A | 18.7 |
| Xgwm635        | 7A | 20.6 |
| Xbarc70        | 7A | 21.3 |
| Xpsr558        | 7A | 23.1 |
| wPt-9496       | 7A | 26.2 |
| Xgwm350        | 7A | 26.3 |
| Xfba42a        | 7A | 27.3 |
| Xfba346        | 7A | 28.3 |
| Xgwm350b       | 7A | 28.3 |
| Xbarc151       | 7A | 29   |
| Xwmc497        | 7A | 29.2 |
| Xgwm526        | 7A | 30.2 |
| Xwmc646        | 7A | 30.9 |
| Xgwm471        | 7A | 35.8 |
| wPt-4487b      | 7A | 36.2 |
| wPt-6966       | 7A | 36.6 |
| wPt-1441       | 7A | 37.9 |
| wPt-0393       | 7A | 38.4 |
| wPt-7653a      | 7A | 38.8 |
| wPt-9207       | 7A | 38.8 |
| wPt-3135       | 7A | 39.1 |
| wPt-5964       | 7A | 40.5 |
| wPt-3648       | 7A | 41   |
| wPt-7491b      | 7A | 43.1 |
| wPt-3434       | 7A | 43.6 |
| Xwmc479        | 7A | 49.2 |
| wPt-6824       | 7A | 49.3 |
| Xgwm834        | 7A | 53.2 |

|              |    |      |
|--------------|----|------|
| Xwmc168      | 7A | 55.8 |
| wPt-5926     | 7A | 56.8 |
| wPt-11672    | 7A | 63.1 |
| wPt-7830b    | 7A | 63.6 |
| wPt-7188     | 7A | 65.1 |
| wPt-4714     | 7A | 66.4 |
| TC67645      | 7A | 67.7 |
| tPt-9948b    | 7A | 67.9 |
| Xgwm60       | 7A | 69   |
| Xsun1-280    | 7A | 69   |
| Xabc158      | 7A | 73   |
| Xfba248      | 7A | 73   |
| Xgwm130      | 7A | 73.6 |
| Xcfd13       | 7A | 75.2 |
| Xwmc593      | 7A | 75.2 |
| wPt-6034     | 7A | 77.4 |
| Xwmc179d     | 7A | 77.8 |
| Xcfd242      | 7A | 79.1 |
| Xbcd1066a    | 7A | 80.2 |
| Xgbx3480a    | 7A | 82.2 |
| Xfba337a     | 7A | 83.2 |
| Xcdo962A     | 7A | 85.2 |
| Xfbb218a     | 7A | 87.2 |
| Xcfa2049     | 7A | 88.2 |
| Xgpw2119     | 7A | 88.2 |
| Lr47         | 7A | 90.2 |
| Xfba248b     | 7A | 90.2 |
| Xfbb166b     | 7A | 90.2 |
| Xwg834c      | 7A | 90.2 |
| wPt-8789     | 7A | 90.5 |
| wPt-7151     | 7A | 90.8 |
| Xgpw2103     | 7A | 91.1 |
| Xwmc179      | 7A | 91.1 |
| QGw1.inra-7A | 7A | 92   |
| wPt-1163     | 7A | 92.2 |
| Xbcd873      | 7A | 93.4 |
| Xgwm276a     | 7A | 93.8 |
| Xgwm60b      | 7A | 94.8 |
| XksuG12a     | 7A | 94.8 |
| wPt-6668     | 7A | 95.3 |
| Xbarc1034    | 7A | 95.5 |
| wPt-3220     | 7A | 95.9 |
| wPt-7299     | 7A | 96.1 |
| Xwmc283      | 7A | 96.3 |
| Xwmc83a      | 7A | 99.3 |

|           |    |       |
|-----------|----|-------|
| wPt-9314  | 7A | 99.4  |
| wPt-4699b | 7A | 99.5  |
| wPt-8650b | 7A | 100.2 |
| wPt-9796  | 7A | 100.7 |
| wPt-6447  | 7A | 102.1 |
| wPt-4835  | 7A | 102.8 |
| Xbarc127  | 7A | 103   |
| wPt-7214  | 7A | 103.2 |
| Xbarc154  | 7A | 103.4 |
| Xbcd135   | 7A | 105.1 |
| wPt-2678  | 7A | 105.7 |
| Xcfa2028  | 7A | 106   |
| wPt-0008  | 7A | 106.3 |
| wPt-7034  | 7A | 106.8 |
| wPt-3572b | 7A | 107   |
| wPt-4345  | 7A | 107.1 |
| XWC2028g  | 7A | 107.8 |
| mIRd30.1  | 7A | 108.8 |
| wPt-1917  | 7A | 108.9 |
| Xfba340   | 7A | 109.7 |
| Xpsr952   | 7A | 109.7 |
| wPt-1080  | 7A | 110.3 |
| wPt-7076  | 7A | 110.9 |
| wPt-5232  | 7A | 111.2 |
| wPt-4880  | 7A | 111.4 |
| P78/M49.4 | 7A | 111.4 |
| Xgwm631   | 7A | 112.6 |
| wPt-0288  | 7A | 113.3 |
| wPt-3373  | 7A | 113.3 |
| TC77994   | 7A | 116.6 |
| P78/M49.7 | 7A | 118.8 |
| Xcfa2174a | 7A | 123.8 |
| Xfbb264   | 7A | 124.8 |
| Xwmc83    | 7A | 126.8 |
| Xwmc405   | 7A | 130.1 |
| Xwmc826   | 7A | 131.5 |
| Xgwm900   | 7A | 135.1 |
| Xbarc174  | 7A | 137.3 |
| TC77993   | 7A | 138.7 |
| Xcdo475b  | 7A | 140.7 |
| Xbarc23   | 7A | 140.8 |
| Xcfd6c    | 7A | 141.4 |
| wPt-1510  | 7A | 141.9 |
| XOA85     | 7A | 142.7 |
| Xgwm573   | 7A | 142.7 |

|               |    |       |
|---------------|----|-------|
| XksuG12b      | 7A | 143.7 |
| XgbxG575a     | 7A | 145.7 |
| wPt-0205      | 7A | 147.2 |
| Xbarc21       | 7A | 147.4 |
| M85/P65.1     | 7A | 147.5 |
| Xfba354a      | 7A | 147.5 |
| wPt-3393      | 7A | 148.1 |
| Xbcd1066b     | 7A | 150.4 |
| Xglk356       | 7A | 150.4 |
| Xwmc17        | 7A | 151.4 |
| Xfba69a       | 7A | 152.4 |
| Xgdm14        | 7A | 152.4 |
| Xcdo17        | 7A | 153.4 |
| Xgpw2083a     | 7A | 153.4 |
| XWB174ha      | 7A | 155.4 |
| Xfbb343       | 7A | 155.4 |
| Xgpw2092      | 7A | 156.4 |
| Xgwm260       | 7A | 156.4 |
| Xsfr.BF475036 | 7A | 157.4 |
| P1            | 7A | 158.4 |
| Xfba97a       | 7A | 159.4 |
| Xbarc195      | 7A | 160.1 |
| Xopa10-480    | 7A | 160.3 |
| Xbarc49       | 7A | 160.5 |
| wPt-4637      | 7A | 161.5 |
| Xbarc29       | 7A | 162.1 |
| Xbarc108      | 7A | 162.8 |
| Xfbb145a      | 7A | 162.9 |
| Xfbb18a       | 7A | 162.9 |
| Xcdo1395      | 7A | 163.2 |
| Xwmc182       | 7A | 163.2 |
| Xwmc695       | 7A | 163.2 |
| Xwmc596       | 7A | 163.6 |
| Xwmc422       | 7A | 163.9 |
| Xwmc65        | 7A | 164.6 |
| wPt-8399      | 7A | 164.7 |
| wPt-4796      | 7A | 165.1 |
| wPt-4744      | 7A | 165.4 |
| M21/P76.12    | 7A | 165.6 |
| M67/P77.4     | 7A | 165.6 |
| Xfba337b      | 7A | 165.6 |
| Xra1-350      | 7A | 165.6 |
| wPt-3992      | 7A | 165.7 |
| Xwmc603       | 7A | 165.9 |
| Xfba234       | 7A | 166.5 |



|            |    |       |
|------------|----|-------|
| Xfbb218b   | 7A | 167.5 |
| Xfba382a   | 7A | 168.5 |
| Xra1-670   | 7A | 168.5 |
| XWB108g    | 7A | 169.5 |
| Xwmc143    | 7A | 169.5 |
| Xcdo962B   | 7A | 172.5 |
| Xpsp3050   | 7A | 173.5 |
| Xwmc107    | 7A | 174.5 |
| Xwmc9      | 7A | 174.5 |
| Xbarc121   | 7A | 177.3 |
| wPt-6842   | 7A | 177.6 |
| Xwmc607    | 7A | 178.5 |
| Xwmc139    | 7A | 179.1 |
| Xgwm10     | 7A | 179.9 |
| Xwmc488    | 7A | 179.9 |
| Xgwm4      | 7A | 180.1 |
| Xcfd193    | 7A | 182.6 |
| wPt-4877   | 7A | 183.2 |
| wPt-6217   | 7A | 183.2 |
| CA668788b  | 7A | 183.4 |
| Xgwm748    | 7A | 183.4 |
| Xdupw254   | 7A | 183.5 |
| CA668775   | 7A | 184.1 |
| Xgwm276    | 7A | 185.1 |
| XksuG12c   | 7A | 193.1 |
| Xdupw226   | 7A | 193.3 |
| Xwmc286    | 7A | 195.8 |
| M21/P76.6  | 7A | 197.8 |
| wPt-3692   | 7A | 200   |
| wPt-0433   | 7A | 201.3 |
| Xfba354b   | 7A | 201.4 |
| Xfba69     | 7A | 203.1 |
| Xcfa2257   | 7A | 209.3 |
| Xcfd20b    | 7A | 209.3 |
| Xcdo595    | 7A | 209.5 |
| Xpsr311    | 7A | 209.5 |
| wPt-5949   | 7A | 210.6 |
| wPt-7053   | 7A | 210.7 |
| Xwmc247    | 7A | 210.8 |
| Xcdo673    | 7A | 210.9 |
| Xwmc426    | 7A | 211   |
| Xcfd20     | 7A | 211.7 |
| P78/M49.2a | 7A | 214.6 |
| Xwg23.6    | 7A | 217.6 |
| Xfba69b    | 7A | 219.6 |

|            |    |       |
|------------|----|-------|
| wPt-4731   | 7A | 220.3 |
| Xfba97b    | 7A | 222.3 |
| XgbxG411a  | 7A | 224.3 |
| M51/P65.7  | 7A | 225.3 |
| Xbarc192   | 7A | 225.4 |
| Xgwm1017   | 7A | 225.6 |
| Xgwm282    | 7A | 227.8 |
| Sr22       | 7A | 228.8 |
| Xgwm332a   | 7A | 228.8 |
| Xfbb145b   | 7A | 232.8 |
| Xfbb18b    | 7A | 232.8 |
| Xrz682     | 7A | 239.8 |
| Xmwg938    | 7A | 240.8 |
| XksuD2     | 7A | 245.8 |
| Xfba204    | 7A | 249.8 |
| Xwg380     | 7A | 251.8 |
| Xfba350    | 7A | 256.8 |
| Xgwm332    | 7A | 259.8 |
| Xpsp3094.1 | 7A | 259.8 |
| Pm37       | 7A | 261.7 |
| Xgwm746    | 7A | 262.2 |
| Xgpw2252   | 7A | 263.5 |
| Xwmc790    | 7A | 263.7 |
| Xgwm63     | 7A | 266.5 |
| Xwmc633    | 7A | 268.9 |
| wPt-0961   | 7A | 270.3 |
| wPt-5524   | 7A | 270.5 |
| wPt-4553   | 7A | 271.1 |
| wPt-6620   | 7A | 272.6 |
| wPt-4831   | 7A | 272.7 |
| BJ262177c  | 7A | 273.7 |
| Xcfd6      | 7A | 278.2 |
| NCA6Pm     | 7A | 281.1 |
| Xcfa2019   | 7A | 281.1 |
| wPt-9808   | 7A | 282.4 |
| Xgwm554    | 7A | 286.4 |
| wPt-6869a  | 7A | 289.2 |
| Xwmc116    | 7A | 290.7 |
| PmNCAG11   | 7A | 290.8 |
| wPt-7219a  | 7A | 290.8 |
| wPt-3439a  | 7A | 291   |
| Xcfa2040a  | 7A | 291.2 |
| wPt-1976   | 7A | 293   |
| wPt-3403   | 7A | 293.1 |
| wPt-8534   | 7A | 293.1 |

|            |    |       |
|------------|----|-------|
| BJ262177b  | 7A | 293.6 |
| Xmag1759   | 7A | 295.1 |
| Xmag2185   | 7A | 295.5 |
| MIm80      | 7A | 296.3 |
| MIm2033    | 7A | 297   |
| Xwmc273    | 7A | 297.2 |
| Xgwm344a   | 7A | 297.3 |
| PmG16      | 7A | 298   |
| M21/P76.13 | 7A | 298.6 |
| P78/M59.5  | 7A | 298.6 |
| P78/M71.8  | 7A | 298.6 |
| Xpsp3001.1 | 7A | 298.6 |
| Xpsr148    | 7A | 298.6 |
| wPt-6797   | 7A | 298.9 |
| MIIW72     | 7A | 299.1 |
| wPt-3154   | 7A | 299.1 |
| Xgwm1061   | 7A | 299.4 |
| Pm22(Pm1e) | 7A | 299.6 |
| P32M51     | 7A | 299.9 |
| wPt-6276a  | 7A | 301.2 |
| M62/P64.8  | 7A | 301.3 |
| PmNCA4     | 7A | 302.5 |
| wPt-8365   | 7A | 302.5 |
| Xcfa2240   | 7A | 302.7 |
| wPt-11370  | 7A | 303   |
| wPt-5940   | 7A | 304.2 |
| wPt-1429   | 7A | 305.1 |
| wPt-9217   | 7A | 305.2 |
| wPt-8846   | 7A | 305.8 |
| wPt-0551   | 7A | 306   |
| wPt-5724   | 7A | 306.2 |
| wPt-5690   | 7A | 307.9 |
| P78/M68.6  | 7A | 309.3 |
| mIRD30     | 7A | 309.4 |
| XgbxG218a  | 7A | 311.7 |
| Xwmc525    | 7A | 311.7 |
| wPt-3226   | 7A | 313.4 |
| Xfba349    | 7A | 313.8 |
| wPt-2260   | 7A | 313.8 |
| TC92445    | 7A | 313.9 |
| Xgwm698    | 7A | 316.8 |
| Lr20       | 7A | 321.6 |
| Sr15       | 7A | 321.6 |
| Xpsr687    | 7A | 321.6 |
| Xpwir232b  | 7A | 321.6 |

|           |    |       |
|-----------|----|-------|
| Pm1       | 7A | 321.6 |
| Xcdo347   | 7A | 321.6 |
| Xgwm344b  | 7A | 321.6 |
| Xpsr680a  | 7A | 321.6 |
| wPt-1601c | 7A | 322.7 |
| Xpsr121   | 7A | 323.2 |
| Xcfa2040  | 7A | 323.6 |
| XksuH9    | 7A | 323.9 |
| wPt-5533  | 7A | 324.8 |
| wPt-1023  | 7A | 324.9 |
| wPt-6019  | 7A | 324.9 |
| wPt-4220  | 7A | 325.1 |
| wPt-4319a | 7A | 325.3 |
| wPt-6495  | 7A | 325.6 |
| wPt-7763  | 7A | 325.6 |
| wPt-7947  | 7A | 326.6 |
| wPt-2501  | 7A | 327   |
| MlaG12    | 7A | 328.3 |
| wPt-0689b | 7A | 328.6 |
| PmU       | 7A | 338.2 |
| Xwmc809   | 7A | 347.5 |
| CA594434c | 7B | 0     |
| Xwmc597   | 7B | 0     |
| Xgwm263   | 7B | 19.1  |
| Xgwm255   | 7B | 20.6  |
| Xwmc606   | 7B | 23.7  |
| Xgwm46a   | 7B | 24.9  |
| Xwmc323   | 7B | 24.9  |
| wPt-7975  | 7B | 25.2  |
| wPt-5283  | 7B | 26.1  |
| wPt-0276  | 7B | 29.4  |
| wPt-3147  | 7B | 29.7  |
| P31/M52-1 | 7B | 32.2  |
| Xgwm569   | 7B | 32.2  |
| wPt-8920b | 7B | 37.6  |
| wPt-5846  | 7B | 37.9  |
| wPt-9800c | 7B | 38    |
| BJ239878  | 7B | 47.5  |
| wPt-2278  | 7B | 50.7  |
| Xwmc338   | 7B | 52.5  |
| wPt-4309  | 7B | 53.1  |
| wPt-1853  | 7B | 55.9  |
| Xfba311a  | 7B | 58.7  |
| Xgpw2233  | 7B | 58.7  |
| P35/M52-4 | 7B | 59.7  |

|             |    |      |
|-------------|----|------|
| Xfba72      | 7B | 59.7 |
| XgbxG367b   | 7B | 59.7 |
| Xgpw2297    | 7B | 60.7 |
| Xgwm233     | 7B | 60.7 |
| Xgwm350     | 7B | 60.7 |
| Xbcd907b    | 7B | 61.7 |
| Xcdo545b    | 7B | 61.7 |
| Xfba65s     | 7B | 61.7 |
| Xfbb121b    | 7B | 61.7 |
| Xgpw2107    | 7B | 61.7 |
| wPt-7318    | 7B | 61.8 |
| Xfbb9b      | 7B | 62.8 |
| XgbxR799b   | 7B | 62.8 |
| wPt-2883    | 7B | 63.3 |
| Xutv911     | 7B | 64.1 |
| Xpsr129     | 7B | 64.8 |
| Xfba17      | 7B | 66.5 |
| Xfba321     | 7B | 66.5 |
| Xfba322     | 7B | 66.5 |
| Xfba93      | 7B | 66.5 |
| Xfbb156c    | 7B | 66.5 |
| Xfbb278d    | 7B | 66.5 |
| Xgwm471     | 7B | 66.5 |
| Xgwm537     | 7B | 66.5 |
| Xgwm601     | 7B | 66.8 |
| P41/M58-169 | 7B | 67.9 |
| wPt-7602    | 7B | 68   |
| Xgwm951     | 7B | 68.5 |
| Xgwm195     | 7B | 69   |
| wPt-7653b   | 7B | 70.6 |
| Xwmc405     | 7B | 70.7 |
| wPt-2737    | 7B | 70.9 |
| wPt-8283    | 7B | 71.2 |
| wPt-2914    | 7B | 71.5 |
| wPt-1723    | 7B | 71.6 |
| wPt-0800    | 7B | 71.9 |
| Xdupw450    | 7B | 72.1 |
| Xcdo475B    | 7B | 72.3 |
| Xgwm400     | 7B | 72.3 |
| Xfbb186     | 7B | 73.3 |
| Xfbb67a     | 7B | 73.3 |
| Xglk301     | 7B | 73.3 |
| P32/M62-5   | 7B | 74.3 |
| Xfba127a    | 7B | 74.3 |
| Xwmc76      | 7B | 74.3 |

|              |    |      |
|--------------|----|------|
| Xfba109      | 7B | 76.3 |
| Xopae7-337   | 7B | 76.3 |
| Xfba346      | 7B | 77.3 |
| Xfba42a      | 7B | 77.3 |
| Xgwm130      | 7B | 77.3 |
| Xgwm526      | 7B | 77.3 |
| Xcdo1395     | 7B | 79.3 |
| Xopa10-280   | 7B | 79.3 |
| Xpsr952      | 7B | 79.3 |
| Xwmc435i     | 7B | 79.3 |
| S18M18_11    | 7B | 80.3 |
| Vrn-B3       | 7B | 80.3 |
| Xgwm60       | 7B | 80.3 |
| S18M20_4     | 7B | 81.3 |
| Xabc158      | 7B | 81.3 |
| Xgwm68       | 7B | 81.3 |
| Xabc465      | 7B | 81.5 |
| Xdupw403a    | 7B | 81.7 |
| Xcfa2028     | 7B | 82.4 |
| Xfba248      | 7B | 83.4 |
| wPt-9467b    | 7B | 84.2 |
| Xubp9        | 7B | 85.6 |
| Xutv777      | 7B | 85.6 |
| Xfbb222b     | 7B | 86.1 |
| Xfbb226.1    | 7B | 86.3 |
| Xgpw2119     | 7B | 86.3 |
| BE499017-174 | 7B | 87.1 |
| Xwmc546.1    | 7B | 87.2 |
| Xgpw2103     | 7B | 87.2 |
| Xgwm935      | 7B | 87.2 |
| P78/M87.4    | 7B | 88.2 |
| Xbcd310      | 7B | 88.2 |
| Xgwm276      | 7B | 88.2 |
| Xbarc85      | 7B | 88.2 |
| Xutv1557     | 7B | 88.4 |
| P34/M48-1    | 7B | 88.9 |
| Xcni8.1      | 7B | 88.9 |
| Xfbb150      | 7B | 88.9 |
| Xpsr955      | 7B | 88.9 |
| Xwg180a      | 7B | 88.9 |
| Xpsr103      | 7B | 89.9 |
| AL825137     | 7B | 90.2 |
| wPt-1457b    | 7B | 90.4 |
| wPt-4230     | 7B | 90.4 |
| Xwmc182      | 7B | 90.5 |

|           |    |      |
|-----------|----|------|
| wPt-9630  | 7B | 90.9 |
| Xgwm573   | 7B | 91.4 |
| Xutv913   | 7B | 91.4 |
| Xgwm573b  | 7B | 91.5 |
| Xwmc426   | 7B | 91.5 |
| Xutv1441  | 7B | 91.6 |
| wPt-0963  | 7B | 91.6 |
| Xbarc83   | 7B | 91.7 |
| Xbarc4b   | 7B | 92   |
| Xwmc376   | 7B | 92   |
| wPt-5463  | 7B | 92   |
| Xbcd1066  | 7B | 92.2 |
| wPt-6498  | 7B | 92.2 |
| Xpsr303   | 7B | 92.4 |
| Xbcd707   | 7B | 92.5 |
| Xcdo949   | 7B | 92.5 |
| Xgwm871   | 7B | 92.6 |
| Xpsr152   | 7B | 92.6 |
| Xubp18    | 7B | 92.6 |
| Xutv1268  | 7B | 92.6 |
| Xgwm941   | 7B | 92.8 |
| M67/P77.2 | 7B | 93   |
| Xbcd385   | 7B | 93   |
| Xfba32    | 7B | 93   |
| Xfba363b  | 7B | 93   |
| Xfbb195   | 7B | 93   |
| Xgwm46b   | 7B | 93   |
| wPt-4863  | 7B | 93.1 |
| wPt-0318  | 7B | 93.2 |
| P78/M71.2 | 7B | 93.5 |
| Xbcd1338  | 7B | 93.5 |
| Xfba340   | 7B | 93.5 |
| Xpsp3015  | 7B | 93.5 |
| Xwmc399   | 7B | 93.5 |
| Xbarc65   | 7B | 93.5 |
| Xbarc72   | 7B | 93.5 |
| Pm40      | 7B | 94.5 |
| Xwmc546   | 7B | 94.5 |
| Xwmc758   | 7B | 94.5 |
| Xbarc255  | 7B | 94.5 |
| Xbcd98    | 7B | 94.5 |
| Xfba371   | 7B | 94.5 |
| Xwmc546.2 | 7B | 94.7 |
| Xgwm43    | 7B | 95.2 |
| wPt-5737b | 7B | 95.2 |

|                |    |       |
|----------------|----|-------|
| wPt-7925       | 7B | 95.2  |
| Xwmc335        | 7B | 96.2  |
| Xabc465a       | 7B | 96.4  |
| Xbcd349        | 7B | 96.4  |
| Xpsr490.1(Ss1) | 7B | 96.4  |
| Xgwm16         | 7B | 96.4  |
| wPt-9814b      | 7B | 96.4  |
| Xgwm297        | 7B | 96.6  |
| Xwmc475        | 7B | 96.8  |
| Xwmc662        | 7B | 97.2  |
| Xgwm644        | 7B | 97.3  |
| Xwmc696        | 7B | 97.5  |
| Xwmc364        | 7B | 97.9  |
| Xwmc476        | 7B | 97.9  |
| Xwmc471b       | 7B | 98.1  |
| Xbarc267       | 7B | 98.4  |
| Xwmc218        | 7B | 98.7  |
| Xabc455        | 7B | 98.9  |
| Xfba234b       | 7B | 98.9  |
| Xfbb264        | 7B | 98.9  |
| Xpsr94         | 7B | 98.9  |
| Xbarc95        | 7B | 99    |
| XksuH1         | 7B | 99.2  |
| Xutv147        | 7B | 99.2  |
| wPt-8106b      | 7B | 99.2  |
| Xcdo595        | 7B | 99.3  |
| Xglk549        | 7B | 99.3  |
| Xgwm333        | 7B | 99.3  |
| Xgwm963        | 7B | 99.3  |
| XS13M50(330)   | 7B | 99.8  |
| Xwmc265        | 7B | 99.9  |
| Xcdo17         | 7B | 100   |
| Xcni7.3        | 7B | 100   |
| Xgbx4899       | 7B | 100   |
| Xgpw2264       | 7B | 100   |
| Xgpw2269       | 7B | 100   |
| Xgwm897        | 7B | 100.5 |
| P32/M55-1      | 7B | 101   |
| S12M17_1       | 7B | 101   |
| Xcdo551        | 7B | 101   |
| Xcdo962        | 7B | 101   |
| Xfba337        | 7B | 101   |
| Xfbb193a       | 7B | 101   |
| Xfbb218        | 7B | 101   |
| Xgwm540        | 7B | 101   |



|              |    |       |
|--------------|----|-------|
| Xpsr690      | 7B | 101   |
| Xwmc269      | 7B | 101   |
| Xutv934      | 7B | 101.1 |
| Xwmc435      | 7B | 101.1 |
| Xbarc90      | 7B | 102   |
| Xfba311b     | 7B | 102   |
| Xfbb343x     | 7B | 102   |
| XgbxGx228    | 7B | 102   |
| Xgpw1100a    | 7B | 102   |
| Xgpw313b     | 7B | 102   |
| S12M20_1     | 7B | 103   |
| Xbcd178      | 7B | 103   |
| XgbxG732     | 7B | 103   |
| Xglk598      | 7B | 103   |
| Xopag18-340  | 7B | 103   |
| Xrz476       | 7B | 103   |
| Xwmc396      | 7B | 104   |
| Xwmc653      | 7B | 104.1 |
| wPt-6463     | 7B | 104.6 |
| wPt-7934b    | 7B | 104.7 |
| Xgwm213      | 7B | 104.8 |
| wPt-11310    | 7B | 104.8 |
| W01T03b      | 7B | 105.2 |
| Xpsr490      | 7B | 105.6 |
| wPt-3873     | 7B | 105.7 |
| Xutv1110     | 7B | 106.2 |
| XS13M50(460) | 7B | 106.3 |
| wPt-0103b    | 7B | 107.5 |
| Dn1881       | 7B | 108.6 |
| Xglk478      | 7B | 108.6 |
| Xpsr927      | 7B | 108.6 |
| Xwmc17       | 7B | 108.6 |
| TC69176      | 7B | 108.6 |
| Xbarc176     | 7B | 108.6 |
| XksuG12      | 7B | 109.6 |
| Xwg514       | 7B | 109.6 |
| P31/M48-2    | 7B | 110.6 |
| Xfba354b     | 7B | 110.6 |
| Xfbb258      | 7B | 110.6 |
| XgbxG575a    | 7B | 110.6 |
| Xopz10-680   | 7B | 110.6 |
| P78/M49.2    | 7B | 111.6 |
| P78/M63.4    | 7B | 111.6 |
| S23M15_4     | 7B | 111.6 |
| Xfba301      | 7B | 111.6 |

|              |    |       |
|--------------|----|-------|
| M62/P64.2    | 7B | 112.6 |
| Xfba69a      | 7B | 112.6 |
| Xfbb179      | 7B | 112.6 |
| Xgpw2083a    | 7B | 112.6 |
| Xpsr350      | 7B | 112.6 |
| S24M26_5     | 7B | 113.6 |
| Xbarc278     | 7B | 113.6 |
| Xfbb175      | 7B | 113.6 |
| Xgpw2092     | 7B | 113.6 |
| P78/M63.7    | 7B | 114.6 |
| Xfba97       | 7B | 114.6 |
| M77/P64.12a  | 7B | 115.6 |
| S13M18_3     | 7B | 115.6 |
| Xfba305      | 7B | 115.6 |
| Xfbb145b     | 7B | 115.6 |
| Xfbb18       | 7B | 115.6 |
| Xfbb352      | 7B | 115.6 |
| Xgwm274      | 7B | 115.6 |
| Xwg686       | 7B | 116.6 |
| Pc1          | 7B | 117.6 |
| Stb13        | 7B | 117.6 |
| Xfba382a     | 7B | 117.6 |
| Xwg180b      | 7B | 117.6 |
| TC69177      | 7B | 117.6 |
| wPt-1149     | 7B | 117.7 |
| XS13M49(400) | 7B | 118.2 |
| XS25M49(175) | 7B | 118.2 |
| XS25M49(400) | 7B | 118.2 |
| wPt-11598    | 7B | 118.7 |
| wPt-3833     | 7B | 118.8 |
| S25M15_19    | 7B | 119   |
| Xpsr680      | 7B | 119   |
| wPt-2305     | 7B | 119   |
| wPt-0920     | 7B | 119.1 |
| wPt-6372     | 7B | 119.2 |
| CA668788a    | 7B | 119.3 |
| wPt-3730     | 7B | 119.3 |
| Xgwm1036     | 7B | 119.4 |
| wPt-4025     | 7B | 119.4 |
| wPt-8919     | 7B | 119.4 |
| TC95791      | 7B | 119.5 |
| Xpsr687      | 7B | 119.5 |
| Xcdo686      | 7B | 120   |
| Xpsr593c     | 7B | 120   |
| Xpwir232b    | 7B | 120   |

|             |    |       |
|-------------|----|-------|
| S13M19_8    | 7B | 122   |
| Xgwm112     | 7B | 122   |
| wPt-0841    | 7B | 122   |
| wPt-3447    | 7B | 122   |
| wPt-8193    | 7B | 122   |
| wPt-8312    | 7B | 122   |
| wPt-9133    | 7B | 122   |
| wPt-9698    | 7B | 122   |
| wPt-8069    | 7B | 122.6 |
| wPt-0980    | 7B | 123.3 |
| wPt-4323    | 7B | 123.3 |
| Xcfa2106    | 7B | 123.6 |
| Xdupw403b   | 7B | 123.6 |
| wPt-1817    | 7B | 123.6 |
| wPt-6700    | 7B | 124.2 |
| Xcfd22      | 7B | 124.3 |
| wPt-1250b   | 7B | 125.4 |
| Xdupw395b   | 7B | 126.4 |
| wPt-6180    | 7B | 126.7 |
| Xwmc51      | 7B | 127.4 |
| wPt-9665    | 7B | 128.1 |
| wPt-8981    | 7B | 128.3 |
| Xgwm302     | 7B | 128.9 |
| wPt-9511    | 7B | 129   |
| wPt-3503b   | 7B | 129.3 |
| Xwmc540b    | 7B | 129.7 |
| Xwmc723     | 7B | 129.7 |
| Xwmc540     | 7B | 129.9 |
| P38/M59-224 | 7B | 130.2 |
| Xwmc051     | 7B | 130.2 |
| BJ213673a   | 7B | 131   |
| Xfba259     | 7B | 131.2 |
| wPt-6162    | 7B | 132.9 |
| Xgwm767     | 7B | 133.5 |
| wPt-9071    | 7B | 133.5 |
| wPt-2273    | 7B | 134.1 |
| wPt-2994    | 7B | 134.4 |
| P78/M59.7   | 7B | 134.7 |
| S24M18_12   | 7B | 134.7 |
| Xwmc517     | 7B | 134.7 |
| Xgwm131     | 7B | 134.7 |
| Xbarc315    | 7B | 135.7 |
| Xwmc537     | 7B | 137.4 |
| Xpsp3033    | 7B | 140.7 |
| wPt-3723    | 7B | 141   |

|             |    |       |
|-------------|----|-------|
| wPt-5922    | 7B | 141.1 |
| wPt-1826    | 7B | 141.6 |
| Xgwm746     | 7B | 142.2 |
| Xpsr129c    | 7B | 142.7 |
| Xdupw398    | 7B | 143.8 |
| wPt-4258    | 7B | 144.5 |
| Xfbb67b     | 7B | 144.6 |
| Xopag2-950  | 7B | 144.6 |
| Xgwm111     | 7B | 146.6 |
| wPt-2688    | 7B | 146.8 |
| wPt-9925    | 7B | 147.4 |
| M77/P64.12  | 7B | 147.6 |
| wPt-5892    | 7B | 147.7 |
| wPt-7887    | 7B | 147.9 |
| XksuD2      | 7B | 148.6 |
| Xcfd6a      | 7B | 148.8 |
| M86/P65.0   | 7B | 149.6 |
| P32/M52-343 | 7B | 149.6 |
| Xgwm746.2   | 7B | 149.6 |
| wPt-1553    | 7B | 149.6 |
| Xwmc792     | 7B | 149.8 |
| M83/P65.7   | 7B | 150.1 |
| P42/M52-3   | 7B | 151.1 |
| M21/P76.9   | 7B | 152.1 |
| M62/P64.11  | 7B | 152.1 |
| M65/P64.2   | 7B | 152.1 |
| Xglk302     | 7B | 152.1 |
| tPt-5747    | 7B | 152.5 |
| P36/M49-6   | 7B | 152.7 |
| P36/M53-184 | 7B | 152.7 |
| P37/M57-180 | 7B | 152.7 |
| Xpsr547     | 7B | 152.7 |
| XP78M71.6   | 7B | 153.7 |
| Xbarc258    | 7B | 153.8 |
| wPt-5341    | 7B | 154.2 |
| M62/P64.9   | 7B | 154.6 |
| P35/M47-1   | 7B | 154.6 |
| P40/M60-58  | 7B | 154.6 |
| XksuE18     | 7B | 155.6 |
| tPt-7362    | 7B | 156.1 |
| wPt-0447    | 7B | 156.3 |
| wPt-1715    | 7B | 156.3 |
| wPt-2668    | 7B | 156.3 |
| wPt-4010    | 7B | 156.3 |
| wPt-4298    | 7B | 156.3 |

|            |    |       |
|------------|----|-------|
| wPt-7351   | 7B | 156.3 |
| P78/M43.14 | 7B | 157.1 |
| Xwmc311    | 7B | 157.1 |
| Xgwm232    | 7B | 158   |
| wPt-8417   | 7B | 158   |
| rPt-3887   | 7B | 158.1 |
| wPt-8615   | 7B | 158.2 |
| wPt-5343   | 7B | 158.4 |
| wPt-8921   | 7B | 158.8 |
| wPt-1422   | 7B | 159.2 |
| wPt-4342   | 7B | 159.2 |
| wPt-5547   | 7B | 159.2 |
| wPt-0482   | 7B | 159.3 |
| wPt-9547   | 7B | 159.6 |
| wPt-5280   | 7B | 160.5 |
| Xgwm420    | 7B | 160.8 |
| wPt-0194   | 7B | 160.9 |
| Xglk750    | 7B | 162.1 |
| wPt-4297   | 7B | 163.2 |
| Xwg232a    | 7B | 163.7 |
| wPt-2356   | 7B | 165.9 |
| Xcnl2.1    | 7B | 166   |
| Xgwm1267   | 7B | 166   |
| wPt-4814   | 7B | 166.1 |
| mlxbd      | 7B | 166.4 |
| P32/M53-4  | 7B | 167.2 |
| P35/M61-1  | 7B | 167.2 |
| Xmwg710a   | 7B | 167.2 |
| wPt-6156   | 7B | 167.3 |
| wPt-3086   | 7B | 167.7 |
| wPt-4300   | 7B | 167.7 |
| wPt-1132b  | 7B | 167.8 |
| wPt-8938   | 7B | 168.3 |
| Xgwm783    | 7B | 169.1 |
| Xwmc613    | 7B | 169.6 |
| TC88833    | 7B | 170.3 |
| P40/M47-4  | 7B | 170.4 |
| Xgwm611    | 7B | 170.4 |
| Xcnl1      | 7B | 171.4 |
| Xwg420     | 7B | 171.4 |
| P35/M47-3  | 7B | 172.4 |
| P38/M49-1  | 7B | 172.4 |
| P41/M48-98 | 7B | 172.4 |
| P41/M50-8  | 7B | 172.4 |
| Xcdo414    | 7B | 172.4 |

|           |    |       |
|-----------|----|-------|
| Xwmc322   | 7B | 172.4 |
| P39/M53-3 | 7B | 173.4 |
| Psy-B1    | 7B | 173.4 |
| Xglk576   | 7B | 173.4 |
| Pm5d      | 7B | 173.9 |
| Lr19      | 7B | 174.4 |
| P33/M55-6 | 7B | 174.4 |
| P35/M49-5 | 7B | 174.4 |
| P38/M54-3 | 7B | 174.4 |
| Rht13     | 7B | 174.4 |
| Sr25      | 7B | 174.4 |
| Xfba21    | 7B | 174.4 |
| Xfbb189.1 | 7B | 174.4 |
| Xgwm577   | 7B | 174.4 |
| wPt-3190  | 7B | 174.4 |
| wPt-7740  | 7B | 174.4 |
| wPt-3093  | 7B | 175.1 |
| wPt-0600  | 7B | 176.5 |
| PmTm4     | 7B | 177.3 |
| wPt-8040b | 7B | 178.6 |
| wPt-3058  | 7B | 178.8 |
| wPt-6104  | 7B | 178.9 |
| wPt-8989  | 7B | 178.9 |
| wPt-9880  | 7B | 178.9 |
| wPt-0217  | 7B | 179   |
| wPt-7295  | 7B | 179   |
| wPt-1267  | 7B | 179.2 |
| wPt-3939  | 7B | 180   |
| XpdaC01   | 7B | 180.3 |
| wPt-8007  | 7B | 180.3 |
| Xmag600   | 7B | 181.1 |
| Xwmc581   | 7B | 181.3 |
| wPt-5138  | 7B | 183.1 |
| wPt-6701  | 7B | 184.5 |
| wPt-6657  | 7B | 185.8 |
| wPt-6869b | 7B | 186.1 |
| wPt-1075  | 7B | 186.5 |
| wPt-1957  | 7B | 186.5 |
| wPt-5228  | 7B | 186.5 |
| wPt-5462  | 7B | 186.5 |
| Pm5e      | 7B | 186.8 |
| wPt-7413  | 7B | 187   |
| Xbarc10   | 7B | 187.2 |
| Xbarc1073 | 7B | 187.3 |
| wPt-7720  | 7B | 187.4 |

|           |    |       |
|-----------|----|-------|
| wPt-3530  | 7B | 188.1 |
| wPt-4743  | 7B | 188.2 |
| wPt-5585  | 7B | 188.2 |
| Swes619   | 7B | 188.4 |
| wPt-3439b | 7B | 188.4 |
| wPt-7219b | 7B | 188.4 |
| wPt-7374  | 7B | 189.9 |
| Xgwm344a  | 7B | 190.2 |
| wPt-2677  | 7B | 190.4 |
| Xbarc340  | 7B | 190.7 |
| Xpsr680b  | 7B | 191.1 |
| wPt-6484  | 7B | 191.3 |
| wPt-4054  | 7B | 191.5 |
| Xmag4362  | 7B | 191.6 |
| XgbxR035  | 7B | 192.1 |
| wPt-5309  | 7B | 192.6 |
| wPt-7046  | 7B | 192.7 |
| Xwmc166   | 7B | 192.9 |
| Xwmc276   | 7B | 193   |
| Xbarc32   | 7B | 193.1 |
| Xbarc50   | 7B | 193.3 |
| wPt-4038  | 7B | 193.8 |
| tPt-6363  | 7B | 194.1 |
| wPt-3004  | 7B | 194.3 |
| wPt-2449  | 7B | 194.8 |
| wPt-4393  | 7B | 195   |
| wPt-7108  | 7B | 195   |
| wPt-5617  | 7B | 195.2 |
| Xwmc273   | 7B | 196.1 |
| TC70722   | 7B | 196.2 |
| Xmwg2062  | 7B | 196.7 |
| Xmag4321  | 7B | 197.3 |
| wPt-4902  | 7B | 197.7 |
| Xcfa2040  | 7B | 198.4 |
| wPt-4140  | 7B | 198.5 |
| wPt-4875  | 7B | 198.5 |
| wPt-5747  | 7B | 198.5 |
| Xbarc182  | 7B | 199   |
| Xgwm1061  | 7B | 199.3 |
| wPt-3710  | 7B | 199.6 |
| wPt-0494  | 7B | 200.1 |
| wPt-3785  | 7B | 200.1 |
| wPt-5816  | 7B | 200.1 |
| wPt-6276b | 7B | 200.1 |
| wPt-6320  | 7B | 200.1 |

|              |    |       |
|--------------|----|-------|
| wPt-9813     | 7B | 200.1 |
| tPt-8504     | 7B | 200.2 |
| wPt-0126     | 7B | 200.2 |
| wPt-1359     | 7B | 200.2 |
| wPt-2838     | 7B | 200.2 |
| wPt-4319b    | 7B | 200.2 |
| wPt-4644     | 7B | 200.2 |
| wPt-5677     | 7B | 200.2 |
| wPt-8936     | 7B | 200.2 |
| wPt-9515     | 7B | 200.2 |
| wPt-9746     | 7B | 200.2 |
| wPt-9992     | 7B | 200.2 |
| wPt-0577     | 7B | 200.3 |
| wPt-4620b    | 7B | 200.4 |
| wPt-9877     | 7B | 200.6 |
| wPt-2878     | 7B | 200.7 |
| wPt-3402     | 7B | 200.7 |
| wPt-5377     | 7B | 200.7 |
| Xmag1715     | 7B | 201.1 |
| Xmag1932     | 7B | 201.1 |
| Xmag1933     | 7B | 202.3 |
| wPt-1475     | 7B | 202.6 |
| BG262689-071 | 7B | 203.1 |
| wPt-7891     | 7B | 204.3 |
| wPt-8598     | 7B | 204.5 |
| Xwmc557      | 7B | 204.9 |
| wPt-1085     | 7B | 204.9 |
| wPt-0504     | 7B | 206   |
| wPt-6869d    | 7B | 206   |
| wPt-5069     | 7B | 206.7 |
| Xwmc10       | 7B | 207.9 |
| Xwmc526      | 7B | 209.5 |
| Xwmc500      | 7B | 209.8 |
| wPt-8650c    | 7B | 209.9 |
| wPt-4057     | 7B | 210.6 |
| wPt-4259     | 7B | 210.6 |
| wPt-7567b    | 7B | 210.6 |
| Xbarc123     | 7B | 211   |
| Xwmc70       | 7B | 211.1 |
| Xgwm146      | 7B | 212.4 |
| QLr.osu-7BL  | 7B | 213.4 |
| wPt-0465     | 7B | 214.1 |
| Stb8         | 7B | 214.4 |
| Xrz508       | 7B | 214.4 |
| wPt-1069     | 7B | 214.8 |



|              |    |       |
|--------------|----|-------|
| Xgwm344b     | 7B | 216.4 |
| wPt-0786     | 7B | 217.4 |
| Xwmc232      | 7B | 218.8 |
| Xbarc94      | 7B | 220.4 |
| Xbarc20      | 7B | 220.8 |
| Xwmc261      | 7B | 231.8 |
| wPt-9488     | 7B | 238   |
| Xmwg710b     | 7B | 272.6 |
| Xgwm350      | 7D | 0     |
| Xwmc646      | 7D | 6     |
| Xfba243      | 7D | 10    |
| Xgpw1108c    | 7D | 10    |
| XgbxR799a    | 7D | 13    |
| wPt-0833b    | 7D | 16.3  |
| Xbcd1975     | 7D | 17    |
| Xwmc506      | 7D | 21    |
| D1.1_ctg1720 | 7D | 22    |
| Xpsr103b     | 7D | 22    |
| wPt-2551     | 7D | 24.1  |
| wPt-0992b    | 7D | 24.7  |
| Xbcd129      | 7D | 27    |
| Xbarc184     | 7D | 28.1  |
| Xwmc450      | 7D | 30.8  |
| Xgwm635      | 7D | 31.5  |
| D1.1_ctg1058 | 7D | 32.2  |
| Xcdo1400     | 7D | 32.2  |
| Xbarc70      | 7D | 41.3  |
| Xbcd588      | 7D | 42.2  |
| Xcfd41       | 7D | 44.2  |
| Xgpw328      | 7D | 46.2  |
| Xgpw1142a    | 7D | 50.2  |
| Xgpw351      | 7D | 51.2  |
| Xgdm145      | 7D | 52.3  |
| Xgdm88       | 7D | 52.3  |
| Xcfd31       | 7D | 53.2  |
| Xcfd26       | 7D | 53.4  |
| Xfba253      | 7D | 53.4  |
| Xcni6a       | 7D | 54.4  |
| Xcfd66       | 7D | 55.1  |
| Xwmc629      | 7D | 55.3  |
| D1.1_ctg4058 | 7D | 55.5  |
| D1.1_ctg4364 | 7D | 55.5  |
| Xbcd1872     | 7D | 55.5  |
| Xwmc698      | 7D | 56    |
| Xwmc606      | 7D | 57.3  |

|              |    |       |
|--------------|----|-------|
| D1.1_ctg3072 | 7D | 58.4  |
| D1.1_ctg4968 | 7D | 58.4  |
| D1.1_ctg8047 | 7D | 58.4  |
| D1.1_ctg9710 | 7D | 58.4  |
| Xfba8y       | 7D | 58.4  |
| XgbxG564     | 7D | 60.4  |
| Xgwm130      | 7D | 61.2  |
| Xbarc154     | 7D | 64.5  |
| Xcfd30       | 7D | 67.1  |
| D1.1_ctg1525 | 7D | 67.1  |
| D1.1_ctg5098 | 7D | 67.1  |
| Xwg834       | 7D | 67.1  |
| Xbarc92      | 7D | 68.1  |
| Xwmc827      | 7D | 68.2  |
| BE418437-195 | 7D | 70.9  |
| Xbarc87      | 7D | 71.9  |
| Xbarc5       | 7D | 72.6  |
| Ltn          | 7D | 73.2  |
| Yr18         | 7D | 73.3  |
| Xgpw1106     | 7D | 73.9  |
| Xgwm1220     | 7D | 74.3  |
| Xwmc463      | 7D | 74.6  |
| Xswm10       | 7D | 74.6  |
| Lr34         | 7D | 76.6  |
| Xwmc405      | 7D | 76.6  |
| Xbcd1438     | 7D | 78.6  |
| Xbarc126     | 7D | 79.6  |
| Xgpw1142b    | 7D | 80.5  |
| Xgwm295      | 7D | 81.4  |
| Xgwm44       | 7D | 82.9  |
| Xcnl6b       | 7D | 83.3  |
| Xbarc352     | 7D | 86.3  |
| D1.1_ctg3701 | 7D | 87.3  |
| D1.1_ctg4161 | 7D | 87.3  |
| Xmwg710b     | 7D | 87.3  |
| Xcfd21       | 7D | 88.3  |
| Xrz2         | 7D | 97.3  |
| Xwmc438      | 7D | 99.1  |
| Xwmc702      | 7D | 99.1  |
| Xfbb366b     | 7D | 100.1 |
| Xbarc125     | 7D | 101.1 |
| Stb5         | 7D | 103.1 |
| Xfba377      | 7D | 108.1 |
| Xgpw299      | 7D | 108.1 |
| Xcfd46       | 7D | 109.1 |

|              |    |       |
|--------------|----|-------|
| XksuA1a      | 7D | 109.1 |
| Xbarc214     | 7D | 117.1 |
| Xcfa2174     | 7D | 122.1 |
| Xgwm676      | 7D | 122.1 |
| Xwmc121      | 7D | 124.1 |
| D1.1_ctg4396 | 7D | 125.1 |
| M62/P64.6    | 7D | 125.1 |
| P78/M43.5    | 7D | 125.1 |
| Stb4         | 7D | 125.1 |
| Xpsr160.2    | 7D | 125.1 |
| Xpsr392.2    | 7D | 125.1 |
| Xpsr563.1    | 7D | 125.1 |
| Xwmc42       | 7D | 125.4 |
| Xgwm111      | 7D | 126.5 |
| XWC0031du    | 7D | 126.9 |
| Xbarc128     | 7D | 126.9 |
| Xgwm296      | 7D | 127.9 |
| Xwmc414      | 7D | 127.9 |
| XWB154u      | 7D | 128.9 |
| Xcfd68       | 7D | 128.9 |
| Xmgl59       | 7D | 128.9 |
| Xpsp3035     | 7D | 129.9 |
| XWB026u      | 7D | 130.9 |
| XWB128ib     | 7D | 130.9 |
| XWC0014u     | 7D | 130.9 |
| Xpsp3113     | 7D | 130.9 |
| Xwmc017      | 7D | 130.9 |
| Xgwm473      | 7D | 131.2 |
| Xwmc653      | 7D | 131.2 |
| Xcfd2        | 7D | 132.2 |
| Xwmc182      | 7D | 132.2 |
| P34/M50-14   | 7D | 132.8 |
| Xgwm437      | 7D | 132.8 |
| Xwmc489      | 7D | 132.8 |
| Xwmc630      | 7D | 132.9 |
| Xwmc221      | 7D | 133   |
| S24M20_11    | 7D | 134   |
| Xbarc26      | 7D | 134   |
| Xcfd14       | 7D | 134   |
| Xcfa2099     | 7D | 139   |
| Xfbb112      | 7D | 142   |
| Xwmc473      | 7D | 142.3 |
| Xcfd193      | 7D | 143.4 |
| Xgpw2052     | 7D | 144.7 |
| Xgpw350      | 7D | 144.7 |

|               |    |       |
|---------------|----|-------|
| Xgpw2160      | 7D | 145.7 |
| Xwmc488       | 7D | 145.9 |
| D1.1_ctg7915  | 7D | 147.5 |
| Xcdo775       | 7D | 147.5 |
| S15M15_1      | 7D | 148.5 |
| Xwg719        | 7D | 148.5 |
| Xwmc426       | 7D | 149.5 |
| Xbarc172      | 7D | 151.5 |
| Xgwm121       | 7D | 154.4 |
| Xwmc94        | 7D | 154.5 |
| Xwmc150       | 7D | 157.8 |
| Xbarc121      | 7D | 159.3 |
| Xgdm67        | 7D | 159.6 |
| Xabc173       | 7D | 160.2 |
| Xwmc797       | 7D | 160.6 |
| Xgdm46        | 7D | 162.1 |
| Xcfd25        | 7D | 164.1 |
| Xbarc105      | 7D | 167.1 |
| Xgpw2327      | 7D | 169.1 |
| XksuE9        | 7D | 169.1 |
| Xwmc671       | 7D | 171.5 |
| Xbarc111      | 7D | 171.8 |
| Xgpw1009      | 7D | 171.8 |
| Xfba69.2      | 7D | 173.8 |
| XgbxG451      | 7D | 174.8 |
| Xgpw334       | 7D | 174.8 |
| Xpsp3123      | 7D | 174.8 |
| D1.1_ctg10053 | 7D | 178.8 |
| Xfbb79        | 7D | 178.8 |
| D1.1_ctg4224  | 7D | 179.8 |
| Xfba264       | 7D | 179.8 |
| D1.1_ctg11444 | 7D | 184.8 |
| Xmwg975       | 7D | 184.8 |
| Xpsp3045      | 7D | 187.8 |
| Xfbb325       | 7D | 188.8 |
| Xwmc824       | 7D | 190   |
| XgbxG411c     | 7D | 193.5 |
| Xbarc53       | 7D | 196.4 |
| Xwg420        | 7D | 197.2 |
| Gb7           | 7D | 199.2 |
| Xbarc235      | 7D | 199.2 |
| Xfba204a      | 7D | 202.2 |
| Xgwm428       | 7D | 206.2 |
| Xpsp3094.2    | 7D | 210.2 |
| Gbd           | 7D | 219.2 |

|              |    |       |
|--------------|----|-------|
| Xfbb189.2    | 7D | 220.2 |
| Gbz          | 7D | 221.2 |
| Xwmc157      | 7D | 221.2 |
| Gbx1         | 7D | 224.2 |
| Gb3          | 7D | 235.2 |
| Xgwm37       | 7D | 235.2 |
| Xwmc273      | 7D | 237   |
| Xwmc634      | 7D | 237.3 |
| Bdv2         | 7D | 237.4 |
| Xcfa2040     | 7D | 238.2 |
| M71/P77.3    | 7D | 238.3 |
| Xbarc76      | 7D | 238.4 |
| Xcfd69       | 7D | 239.1 |
| Xwmc166      | 7D | 241   |
| M71/P77.7    | 7D | 244.3 |
| D1.1_ctg5649 | 7D | 245.3 |
| XksuE3.4     | 7D | 245.3 |
| Xwmc14       | 7D | 247   |
| Xcfd175      | 7D | 248.4 |

Supplementary material 2. Description and category of the traits collected for QTL meta-analysis.

| <b>Trait</b> | <b>Description</b>                     | <b>Category</b>        |
|--------------|----------------------------------------|------------------------|
| ACT          | Root Activity                          | Root Activity          |
| ARD          | Average Root Diameter                  | Root Diameter          |
| ARL          | Average Root Length                    | Root Length            |
| ARN          | Axial Root Number                      | Root Number            |
| AWSDW        | Above-wax seminal dry weight           | Root Weight            |
| BWSDW        | Below-wax seminal dry weight           | Root Weight            |
| CCR          | Root Ca <sup>2+</sup> concentration    | Nutrient Concentration |
| CRS          | Number of Root Crossings               | Root Crossings         |
| DRR          | Deep Root Ratio                        | Root Depth             |
| DRW          | Deep Root Weight                       | Root Weight            |
| EASR         | Emergence Angle of the Seminal Root    | Root Angle             |
| FRK          | Number of Root Forks                   | Root Number            |
| KCR          | Root K <sup>+</sup> concentration      | Nutrient Concentration |
| LatRL        | lateral root length                    | Root Length            |
| LRL          | Longest Root Length                    | Root Length            |
| LRN          | Number of lateral roots                | Root Number            |
| MaxRD        | Maxium Root Depth                      | Root Depth             |
| MaxRL        | Maximal Root Length                    | Root Length            |
| MaxRW        | Maximum Root Width                     | Root Width             |
| MCR          | Root Mg <sup>2+</sup> concentration    | Nutrient Concentration |
| MRL          | Main Root Length                       | Root Length            |
| NCR          | Root Na <sup>+</sup> concentration     | Nutrient Concentration |
| PRA          | Project Root Area                      | Root Area              |
| PRD          | Primary Root Diameter                  | Root Diameter          |
| PRE          | Primary root elongation                | Root Length            |
| PRL          | Primary Root Length                    | Root Length            |
| PRS          | Primary Root Surface                   | Root Area              |
| PRV          | Primary Root Volume                    | Root Volume            |
| RAH          | Root Angle in response to Hydrotropism | Root Angle             |
| RBB30        | Root biomas below 30cm                 | Root Biomass           |
| RBU30        | Root biomass up to 30cm                | Root Biomass           |
| RDW          | Root Dry Weight                        | Root Weight            |
| RER          | Root Elongation Rate                   | Root Length            |
| RFW          | Root Fresh Weight                      | Root Weight            |
| RGA          | Root Growth Angle                      | Root Angle             |
| RHL          | Root Hair Length                       | Root Length            |
| RKC          | Root K content per plant               | Nutrient Concentration |
| RKUE         | Root K utilization efficiency          | Nutrient Concentration |
| RNC          | Root N content per plant               | Nutrient Concentration |
| RP           | Root Penetration                       | Root Root Growth       |
| RPC          | Root P content per plant               | Nutrient Concentration |
| RPR          | Root-Plant biomass Ratio               | Root Biomass           |

|       |                                               |                        |
|-------|-----------------------------------------------|------------------------|
| RPUE  | Root P utilization efficiency                 | Nutrient Concentration |
| RRGI  | Relative Root Growth Inhibition               | Root Growth            |
| RSA   | Root surface Area                             | Root Area              |
| RSR   | Root Shoot Ratio                              | Root Shoot Ratio       |
| RT6   | Presence of the sixth asymmetric seminal root | Root Number            |
| RV    | Root Volume                                   | Root Volume            |
| SAL   | Seminal Axes Length                           | Root Length            |
| SASA  | Seminal Axes Surface Area                     | Root Area              |
| SAVol | Seminal Axes Volume                           | Root Volume            |
| SLL   | Seminal Lateral roots Length                  | Root Length            |
| SLSA  | Seminal Lateral roots Surface Area            | Root Area              |
| SLVol | Seminal Lateral roots Volume                  | Root Volume            |
| SRA   | Seminal Root Angle                            | Root Angle             |
| SRL   | Seminal Root Length                           | Root Length            |
| SRN   | Seminal Root Number                           | Root Number            |
| SRW   | Shallow Root Weight                           | Root Weight            |
| TIP   | Number of Root Tips                           | Root Number            |
| TRB   | Total Root Biomass                            | Root Biomass           |
| TRD   | Total Root Diameter                           | Root Diameter          |
| TRL   | Total Root Length                             | Root Length            |
| TRL30 | Total Root Longer 30cm                        | Root Length            |
| TRN   | Total Root Number                             | Root Number            |

Supplementary Material 3. QTL overview index. The horizontal solid line represents the average value for the overview index and the horizontal dotted line represents the threshold for high values.

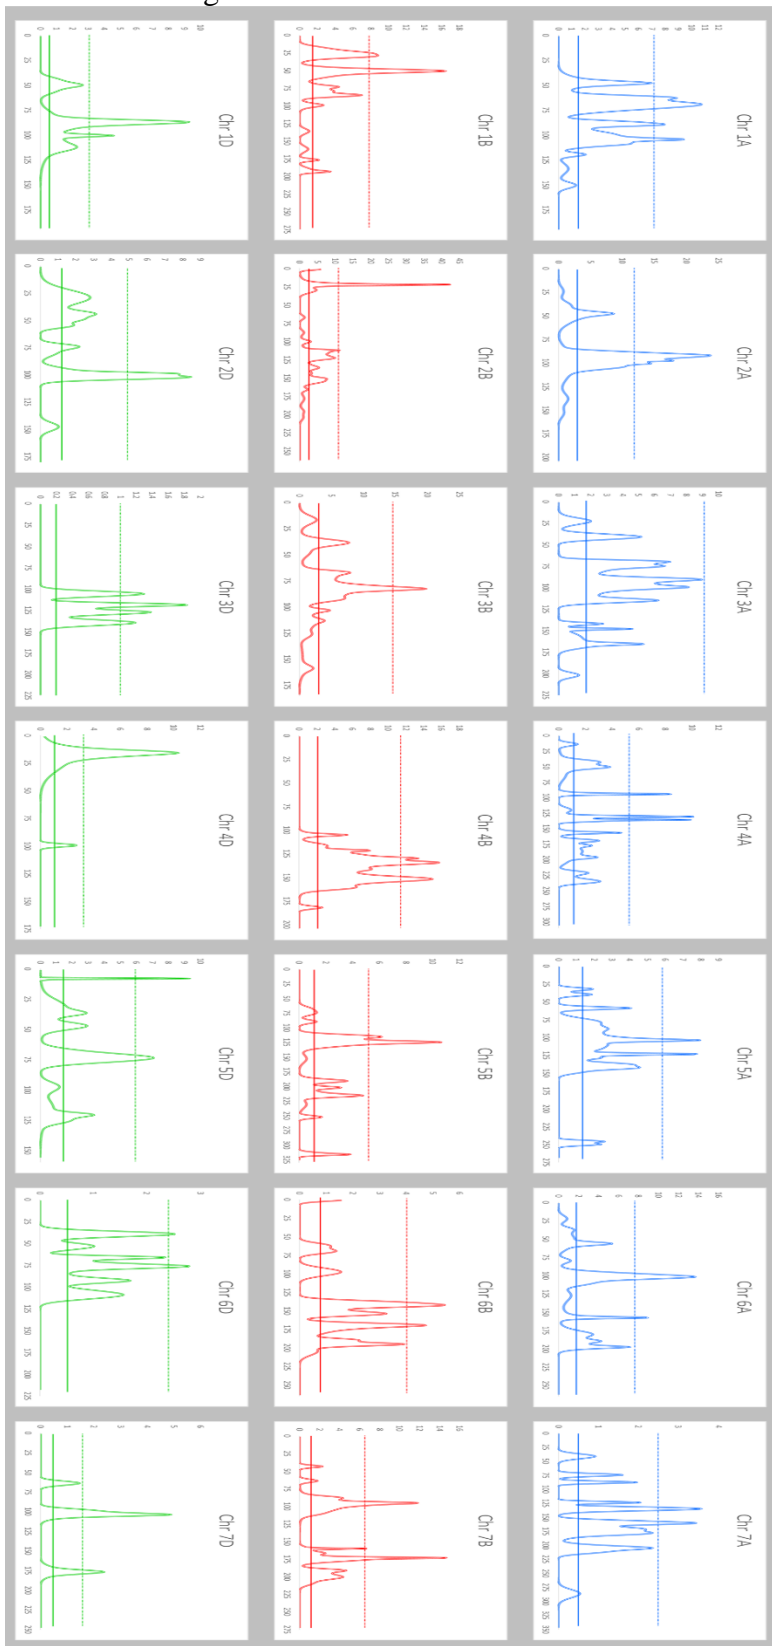

Supplement: 41598_2019_47038_MOESM1_ESM.pdf [file 41598_2019_47038_MOESM1_ESM.pdf]
